# Supplementary figures and images for: Impacts of Climate Change on the Biogeography of Three Amnesic Shellfish Toxin Producing Diatom Species
Source: MDPI journal article supplement (doi:10.3390/toxins15010009), 2022-12-22

**Pseudo\_nitzchia\_serjata\_2050\_RCP8.5\_binary**

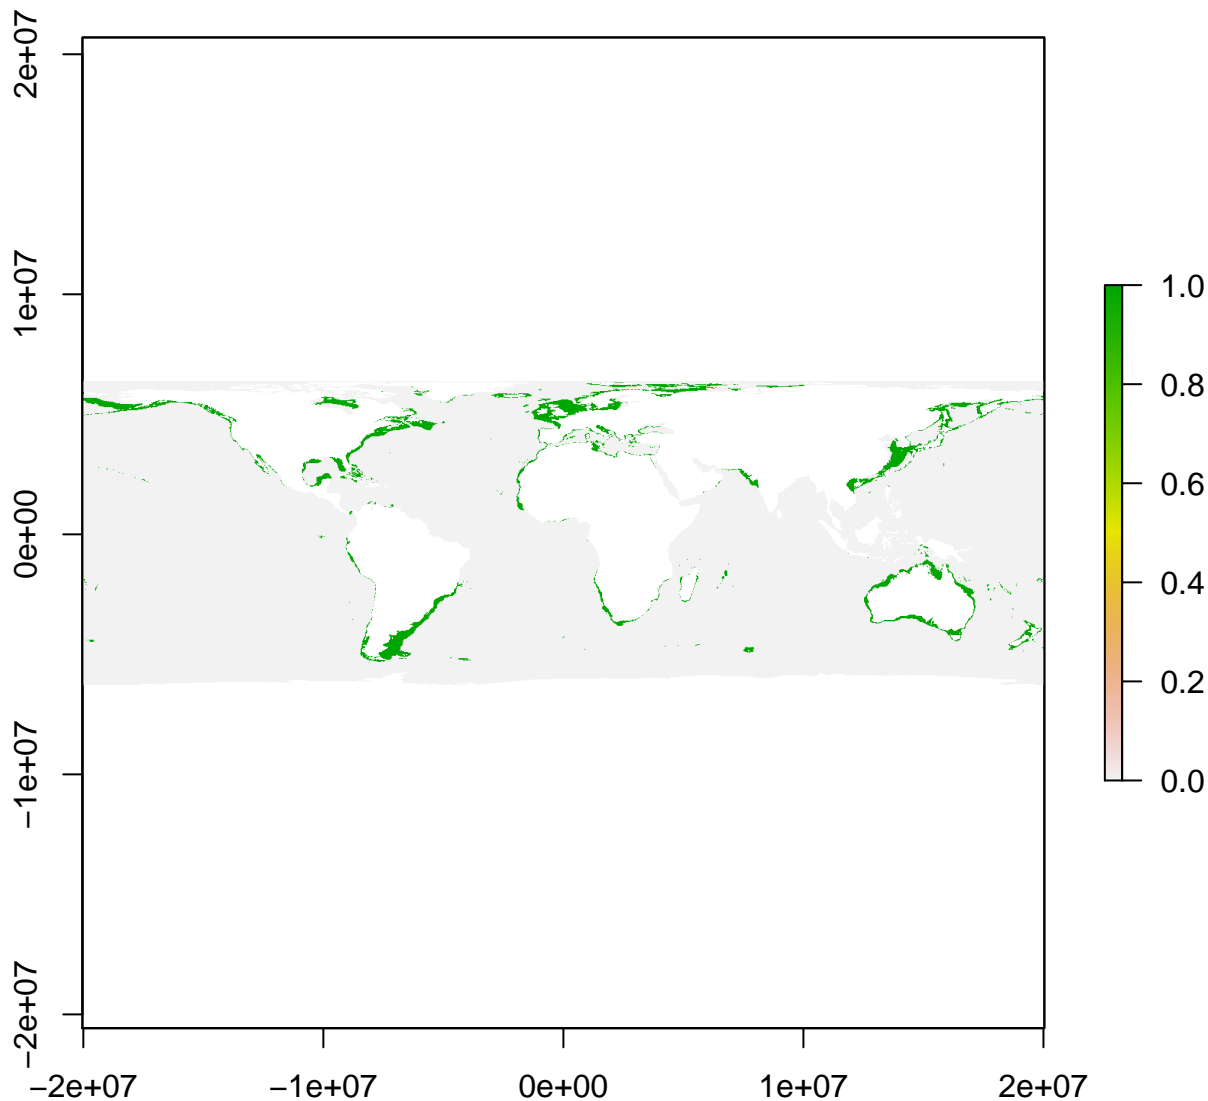

Supplement: s1 [file s1]

# Pseudo\_nitzchia\_fraudulenta\_2050\_RCP8.5\_binary

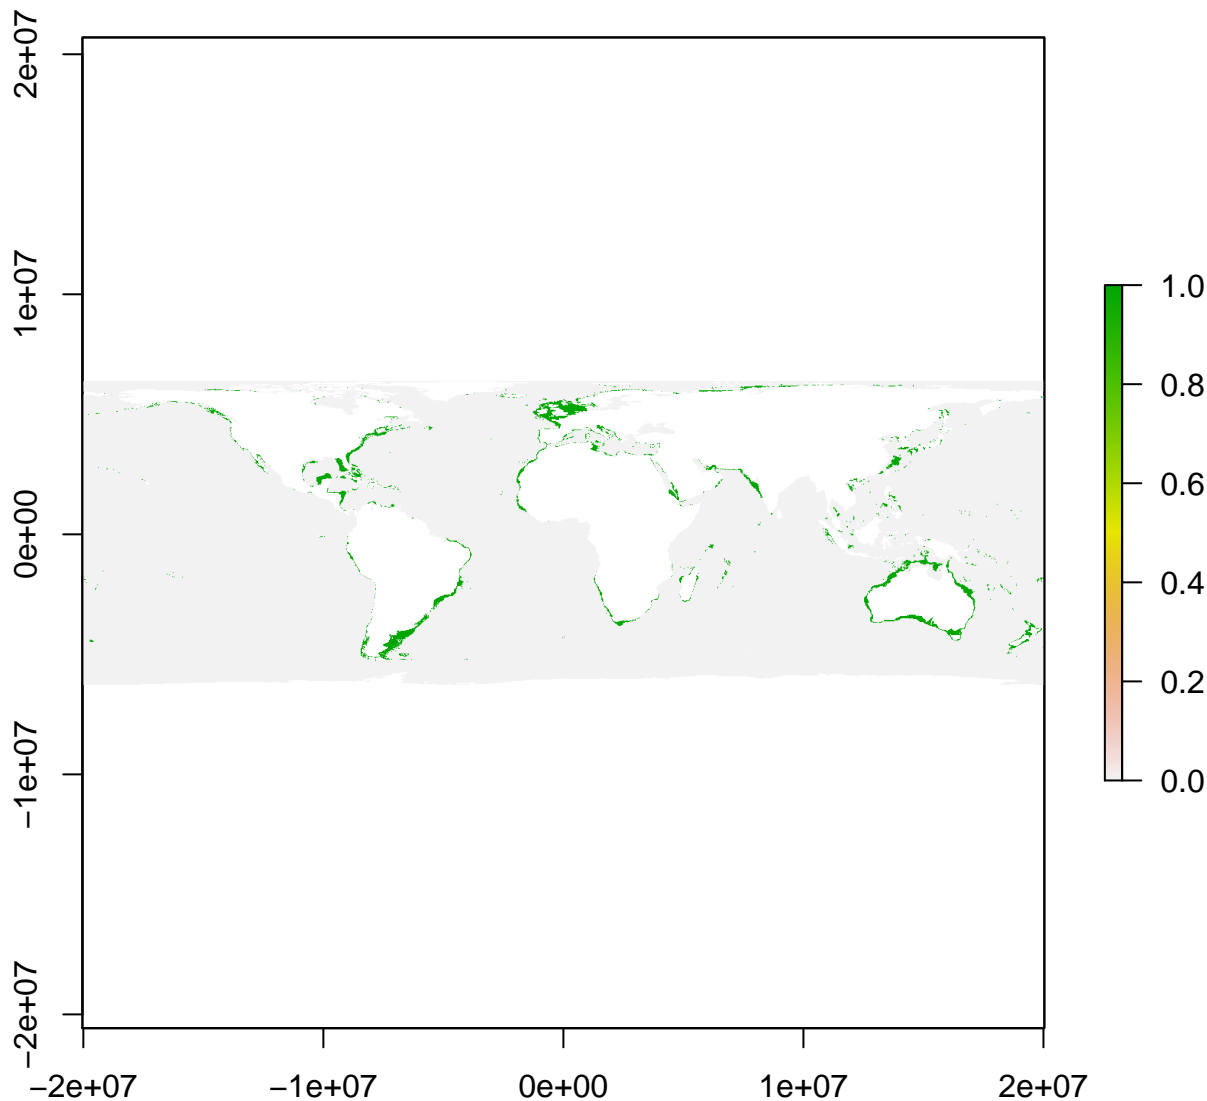

Supplement: s1 [file s1]

# Pseudo\_nitzchia\_serjata\_2100\_RCP6.0

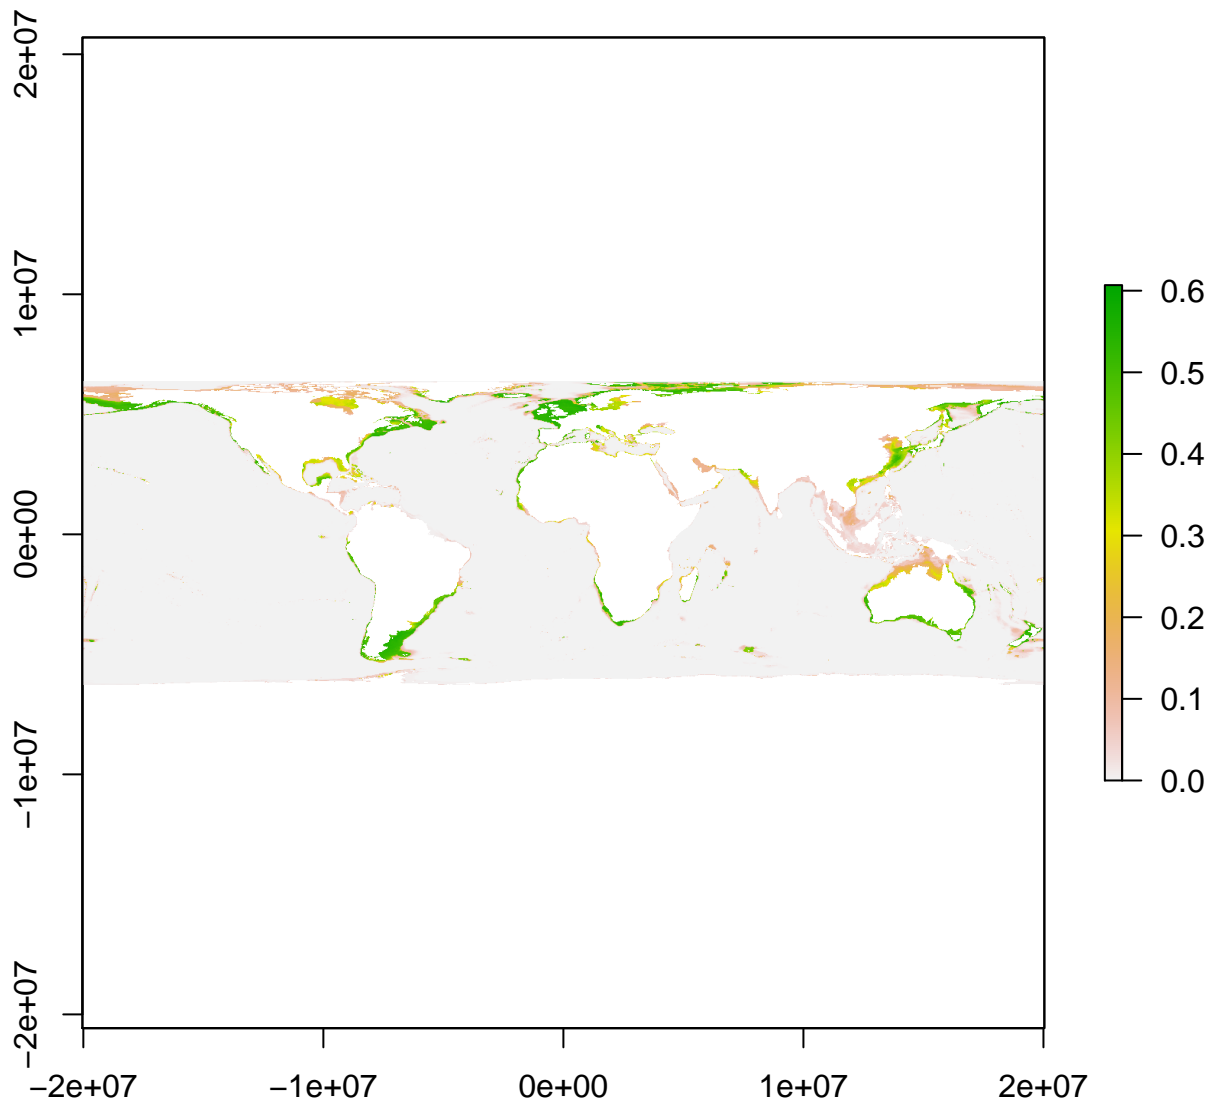

Supplement: s1 [file s1]

# Pseudo-nitzschia\_australis\_2100\_RCP6.0

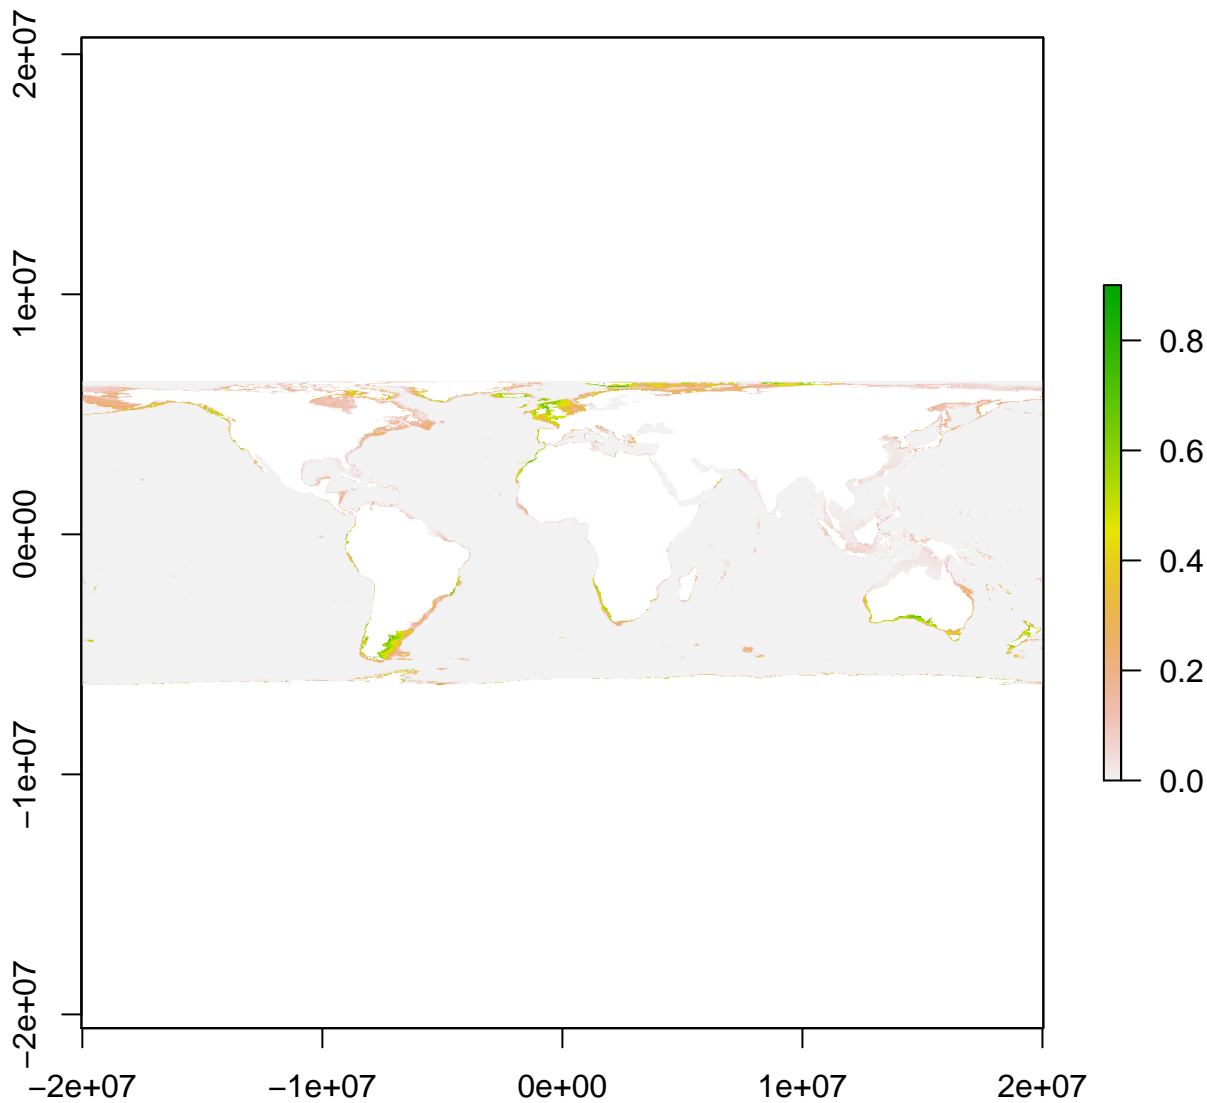

Supplement: s1 [file s1]

# Pseudo\_nitzchia\_serjata\_2100\_RCP6.0\_binary

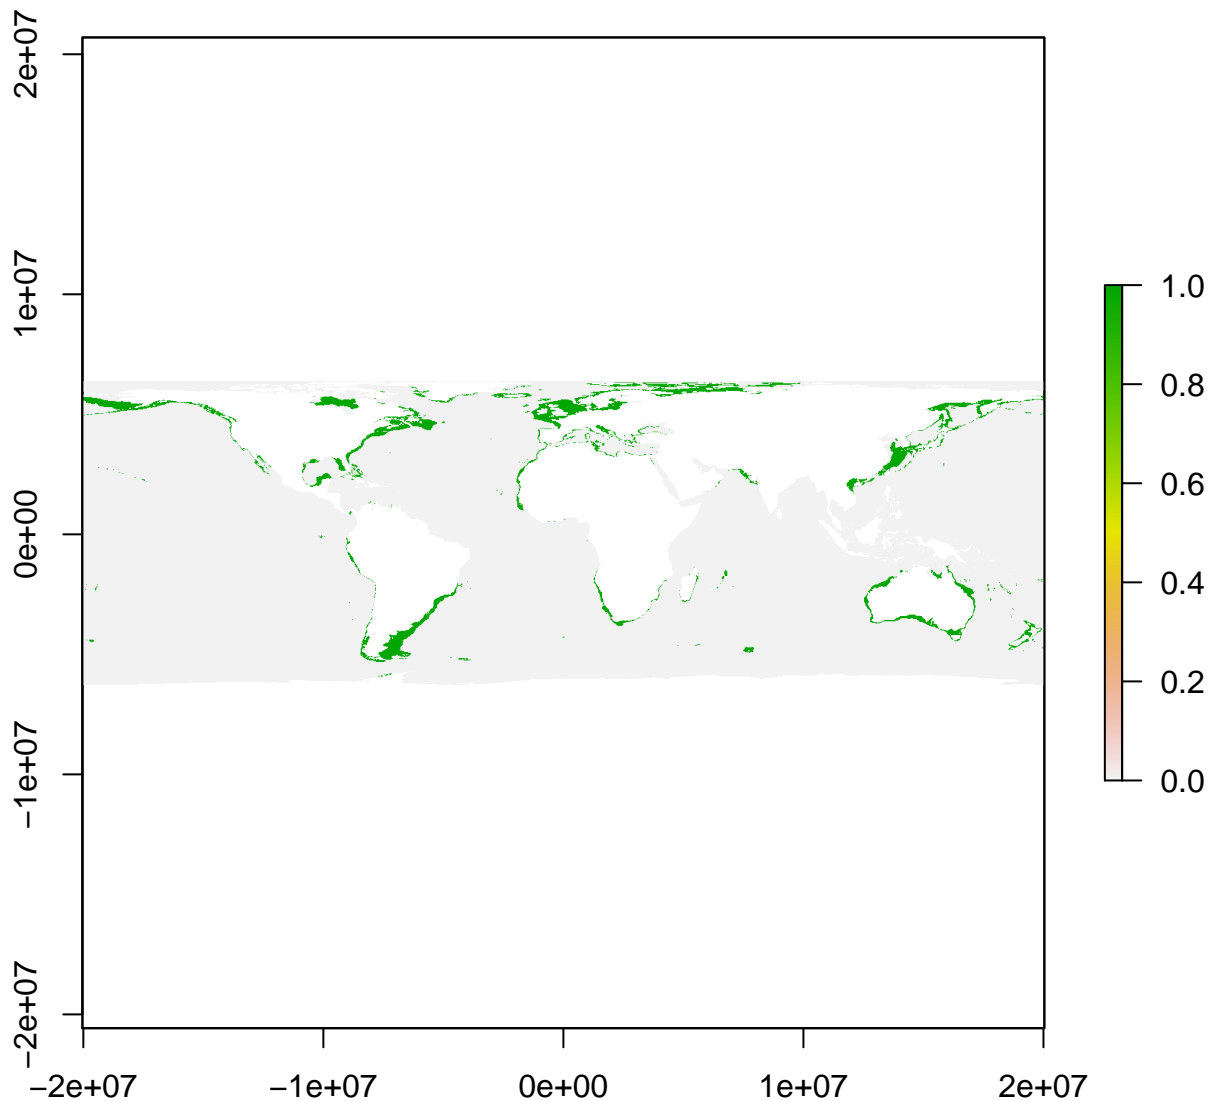

Supplement: s1 [file s1]

# Pseudo-nitzschia\_australis\_2100\_RCP8.5\_binary

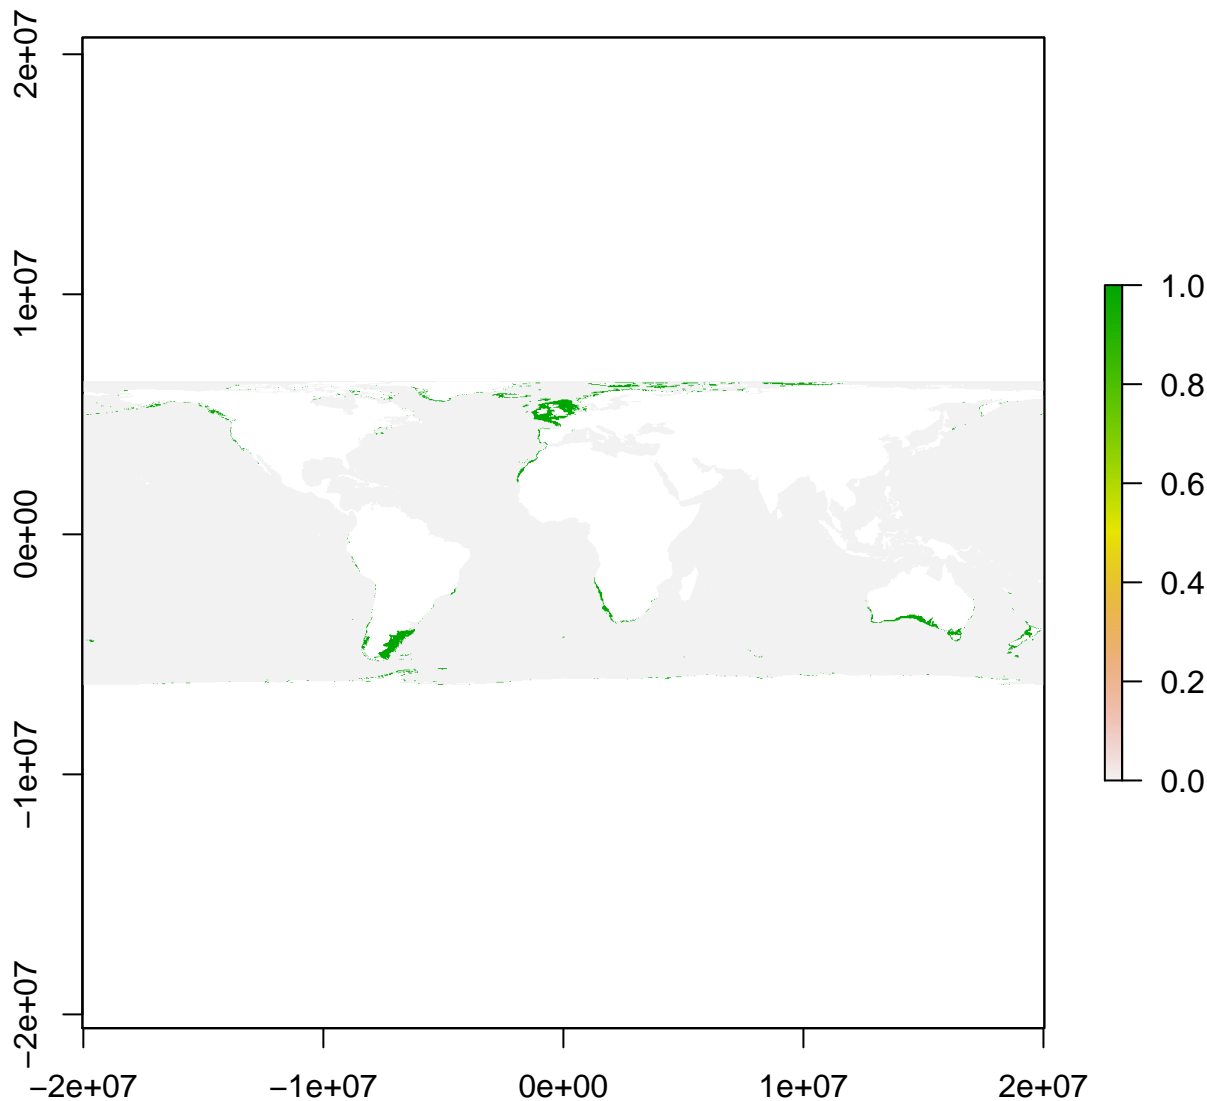

Supplement: s1 [file s1]

# Pseudo-nitzschia\_australis\_2100\_RCP6.0\_binary

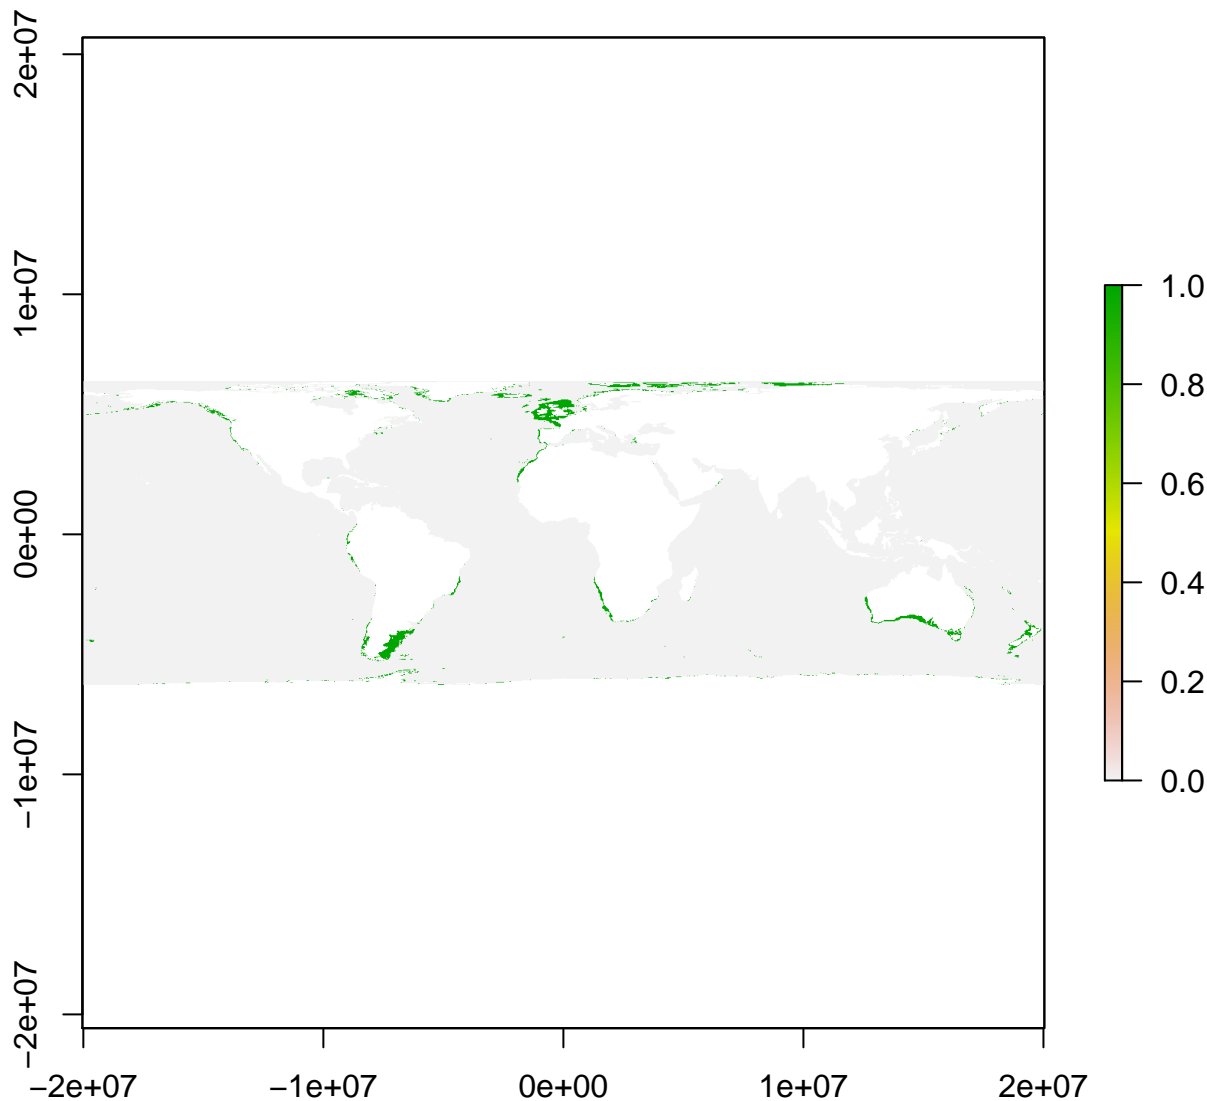

Supplement: s1 [file s1]

# Pseudo-nitzschia\_australis\_2050\_RCP4.5

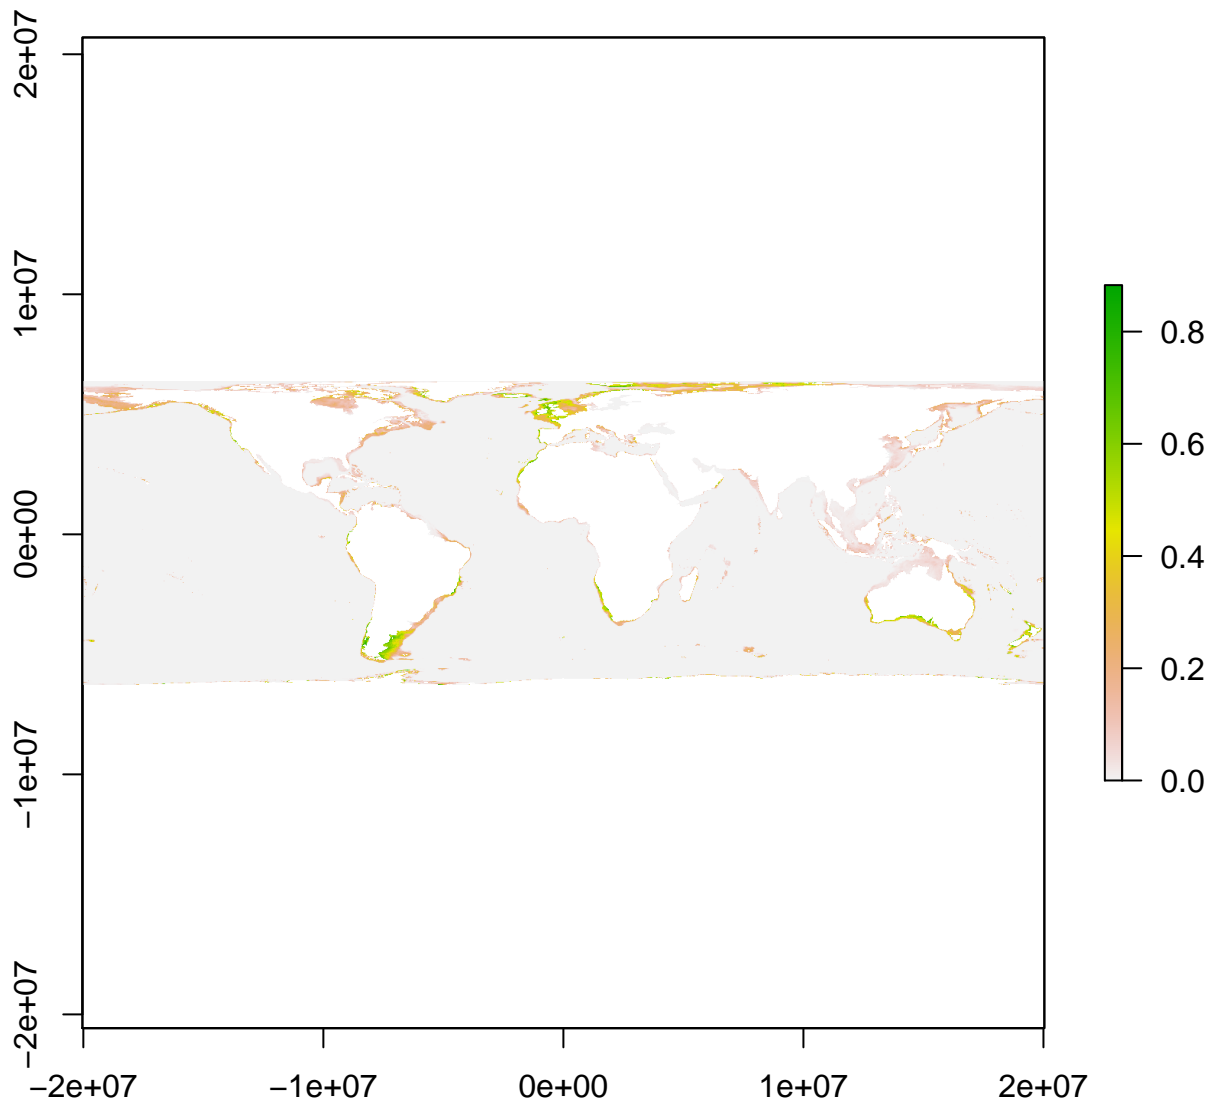

Supplement: s1 [file s1]

# Pseudo-nitzschia\_australis\_2050\_RCP6.0

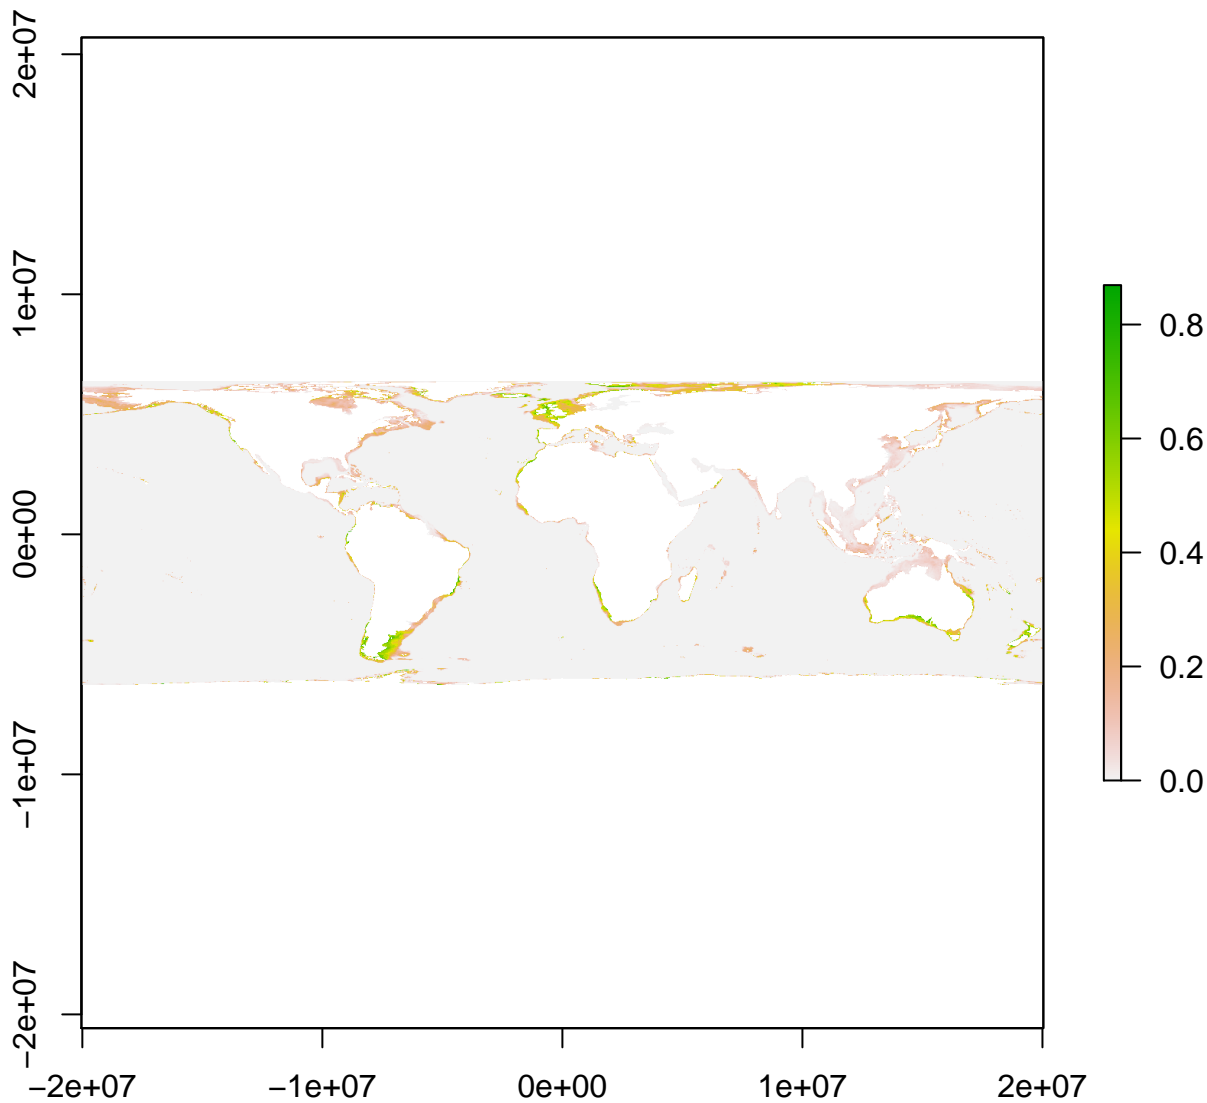

Supplement: s1 [file s1]

# Pseudo\_nitzchia\_fraudulenta\_2100\_RCP4.5

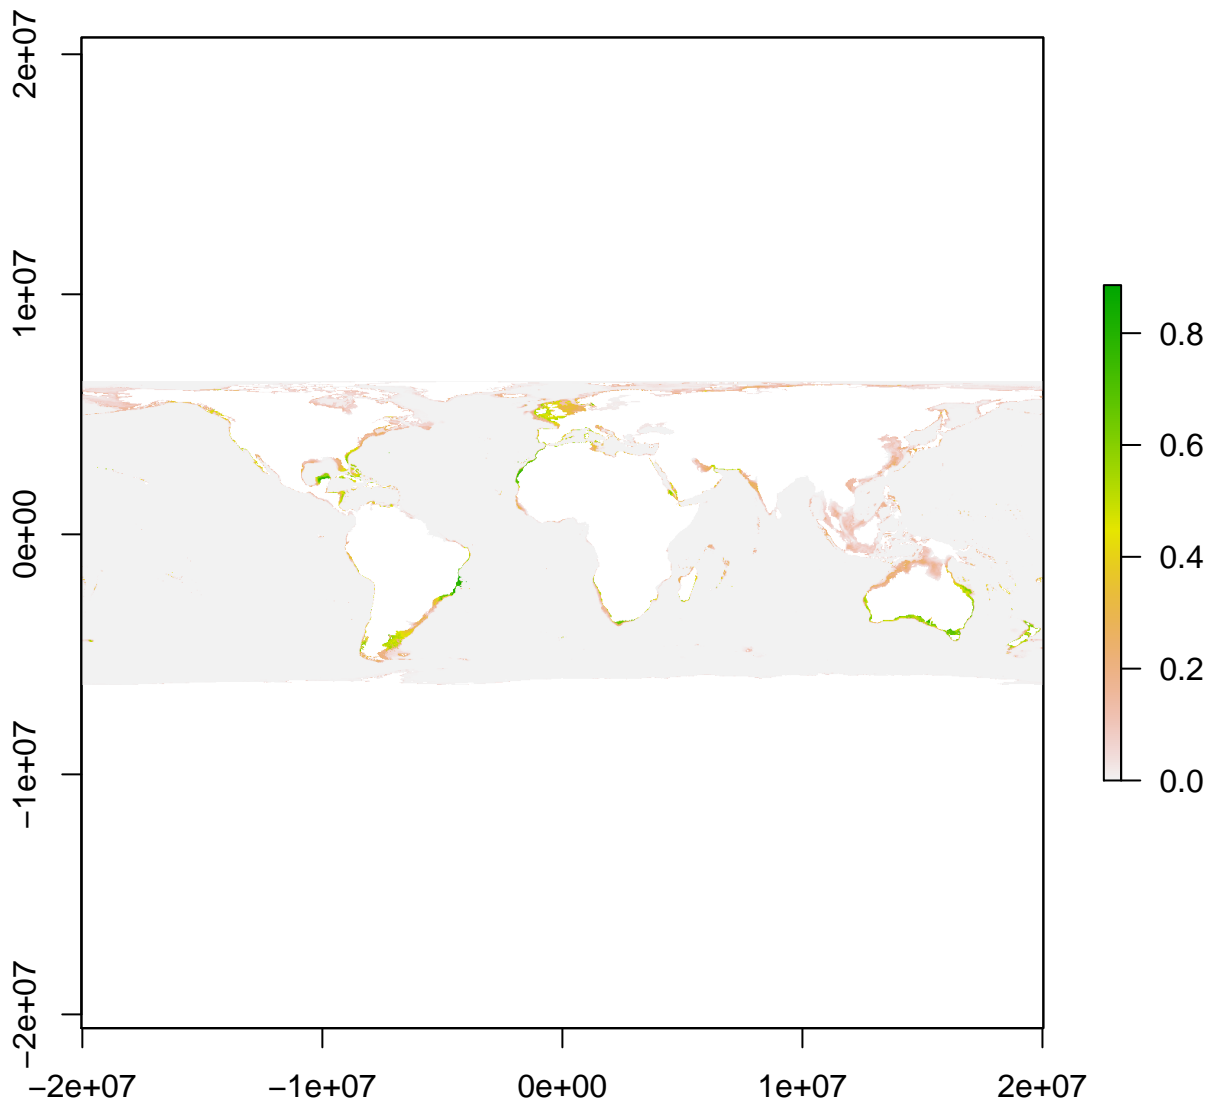

Supplement: s1 [file s1]

# Pseudo\_nitzchia\_serjata\_2100\_RCP8.5\_binary

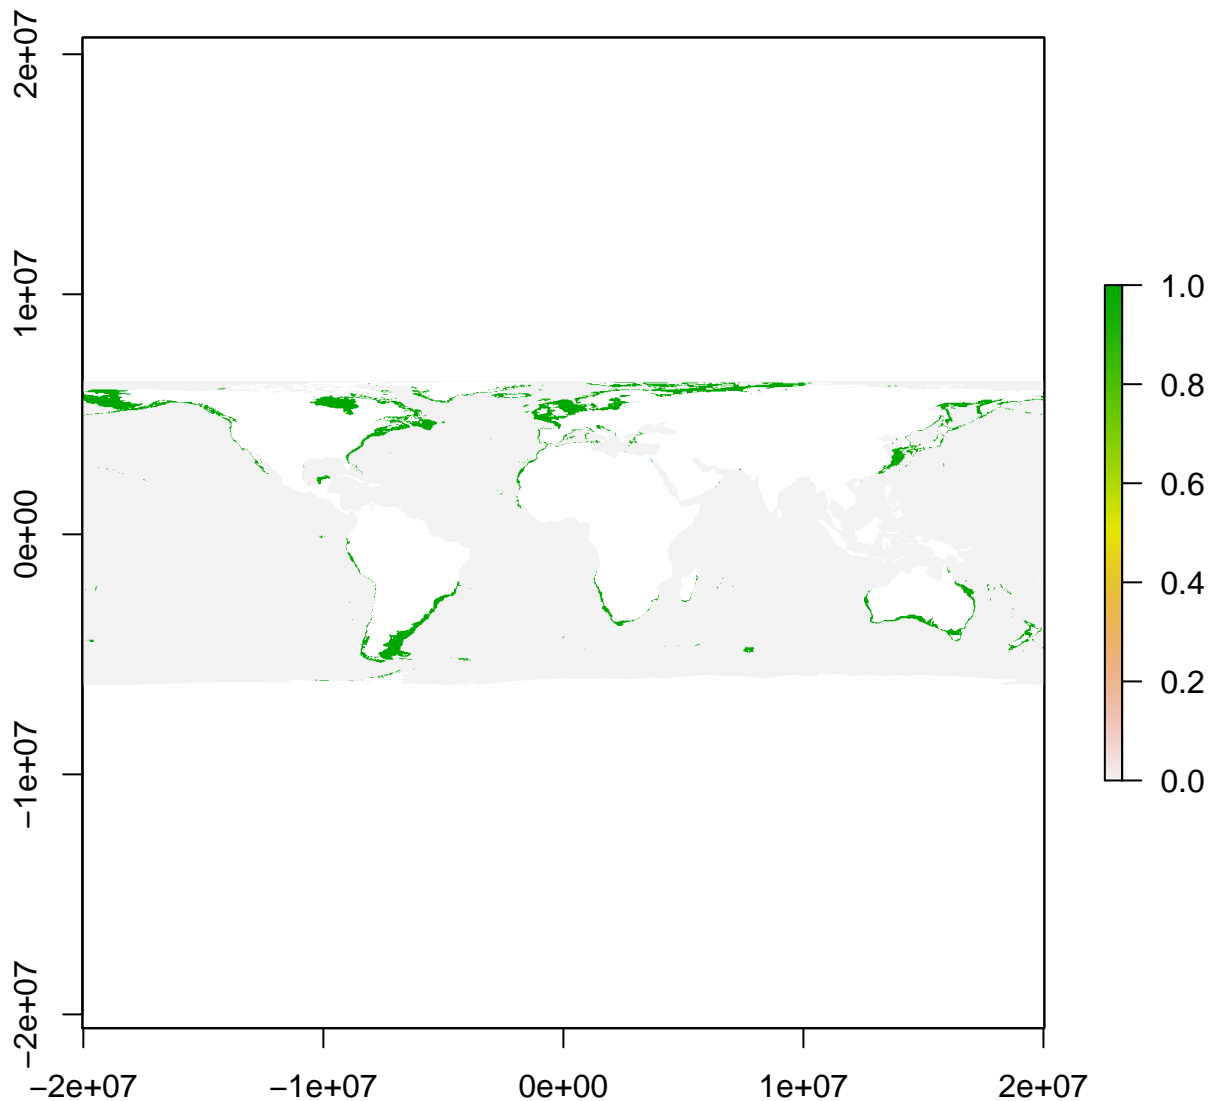

Supplement: s1 [file s1]

# Pseudo\_nitzchia\_serziata\_present\_binary

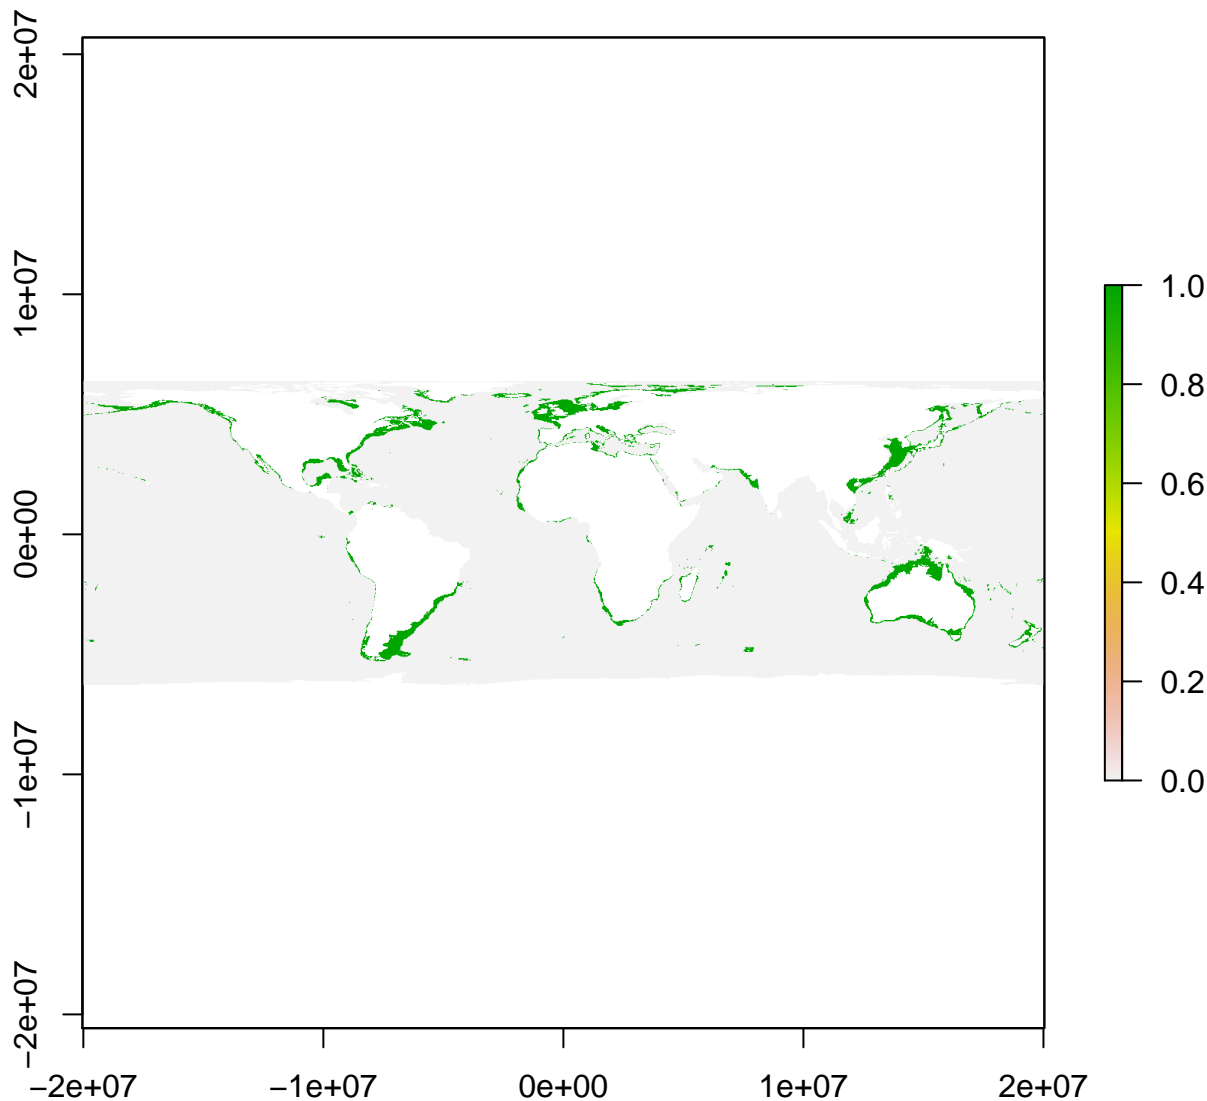

Supplement: s1 [file s1]

# Pseudo\_nitzchia\_fraudulenta\_2100\_RCP4.5\_binary

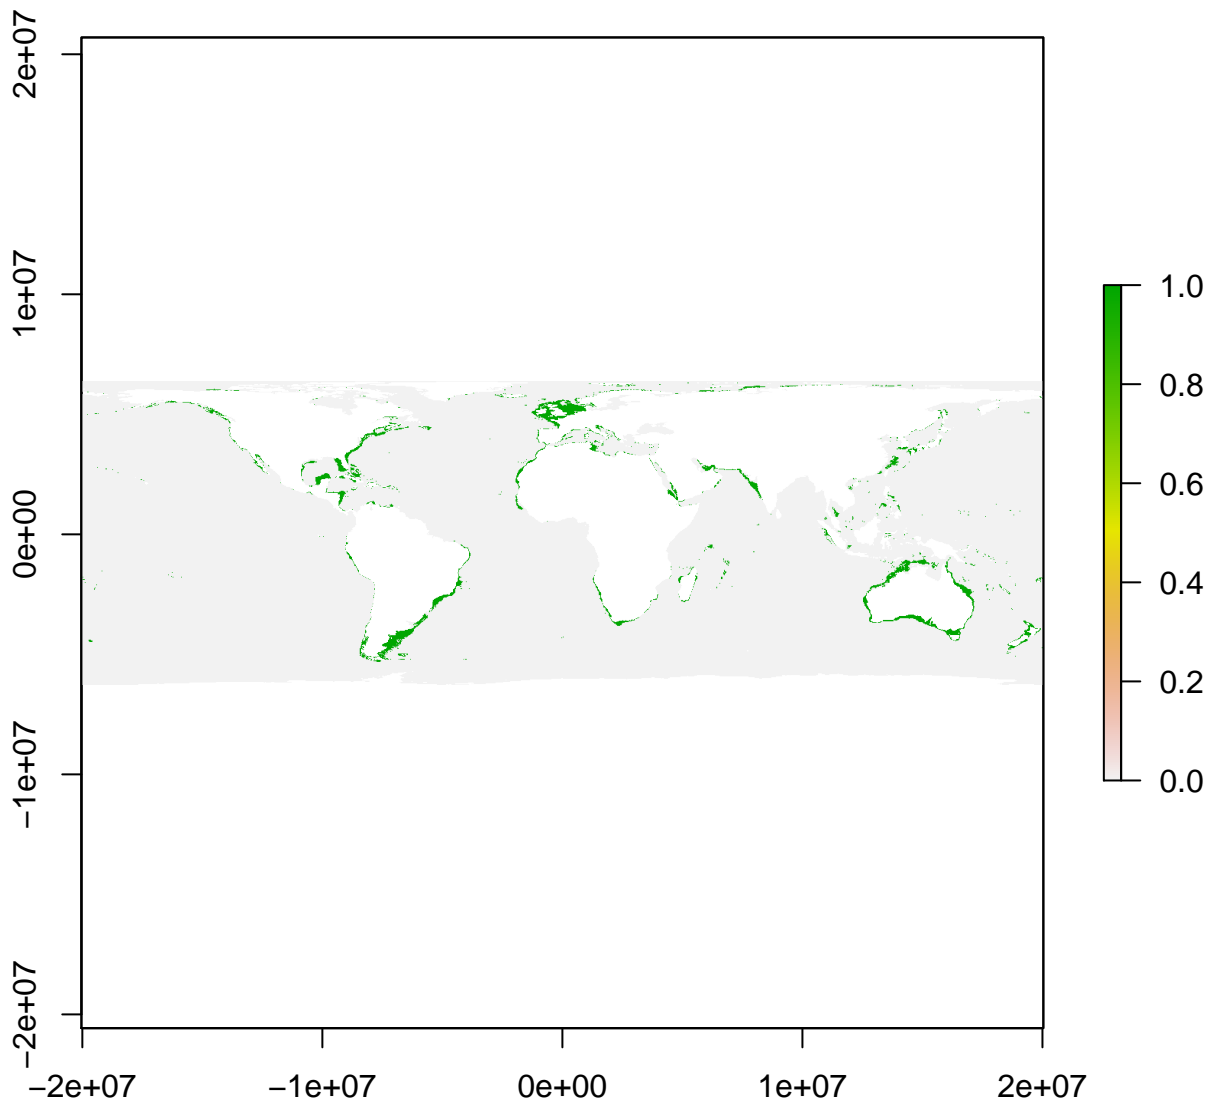

Supplement: s1 [file s1]

# Pseudo-nitzschia\_australis\_2100\_RCP2.6\_binary

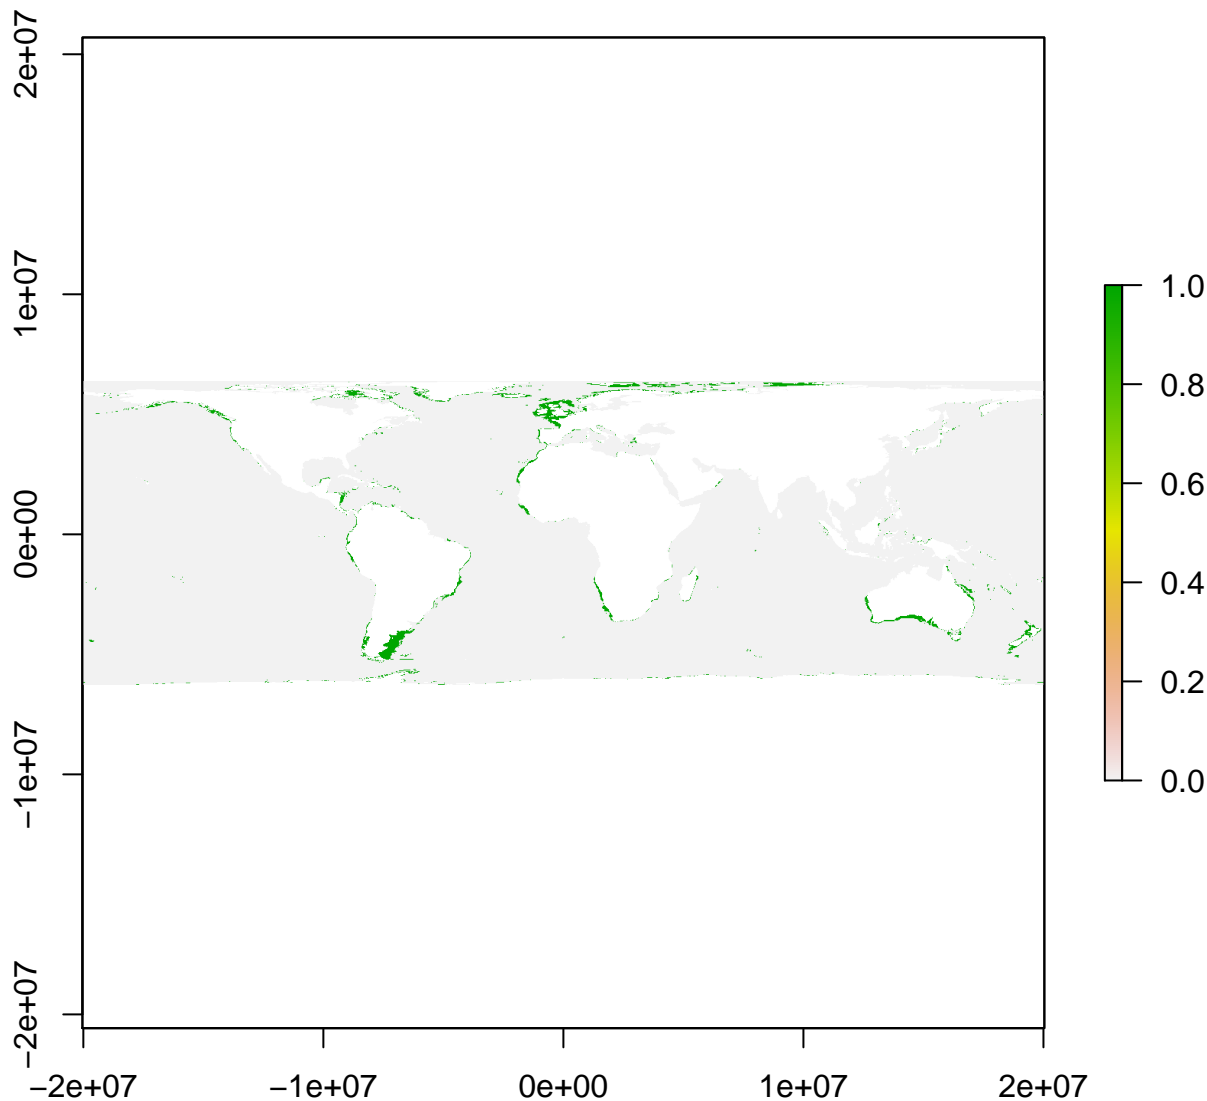

Supplement: s1 [file s1]

# Pseudo\_nitzchia\_fraudulenta\_present

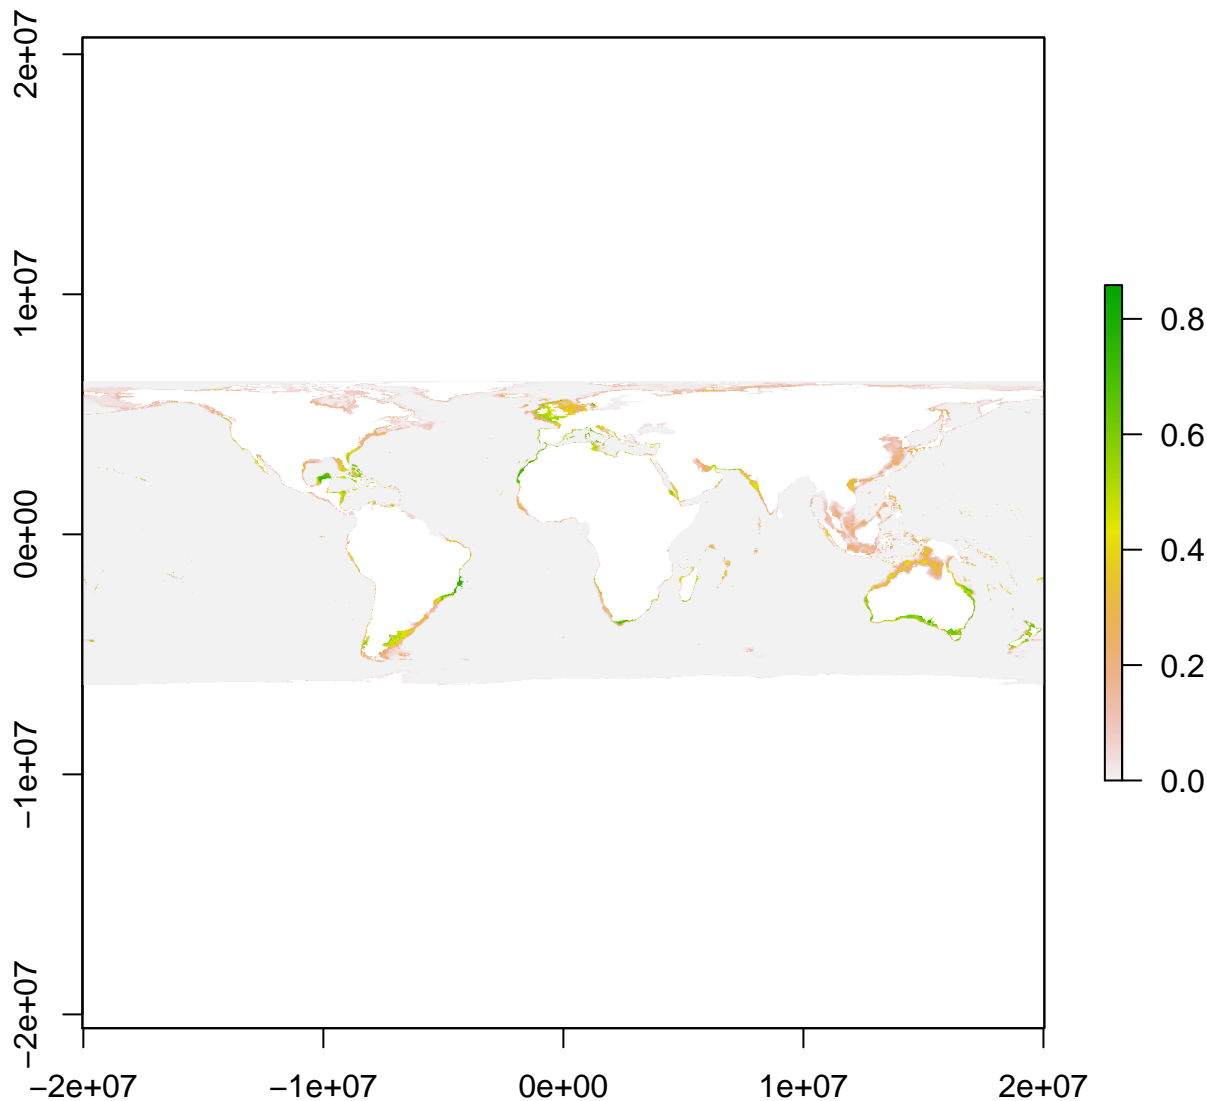

Supplement: s1 [file s1]

# Pseudo-nitzschia\_australis\_2050\_RCP8.5

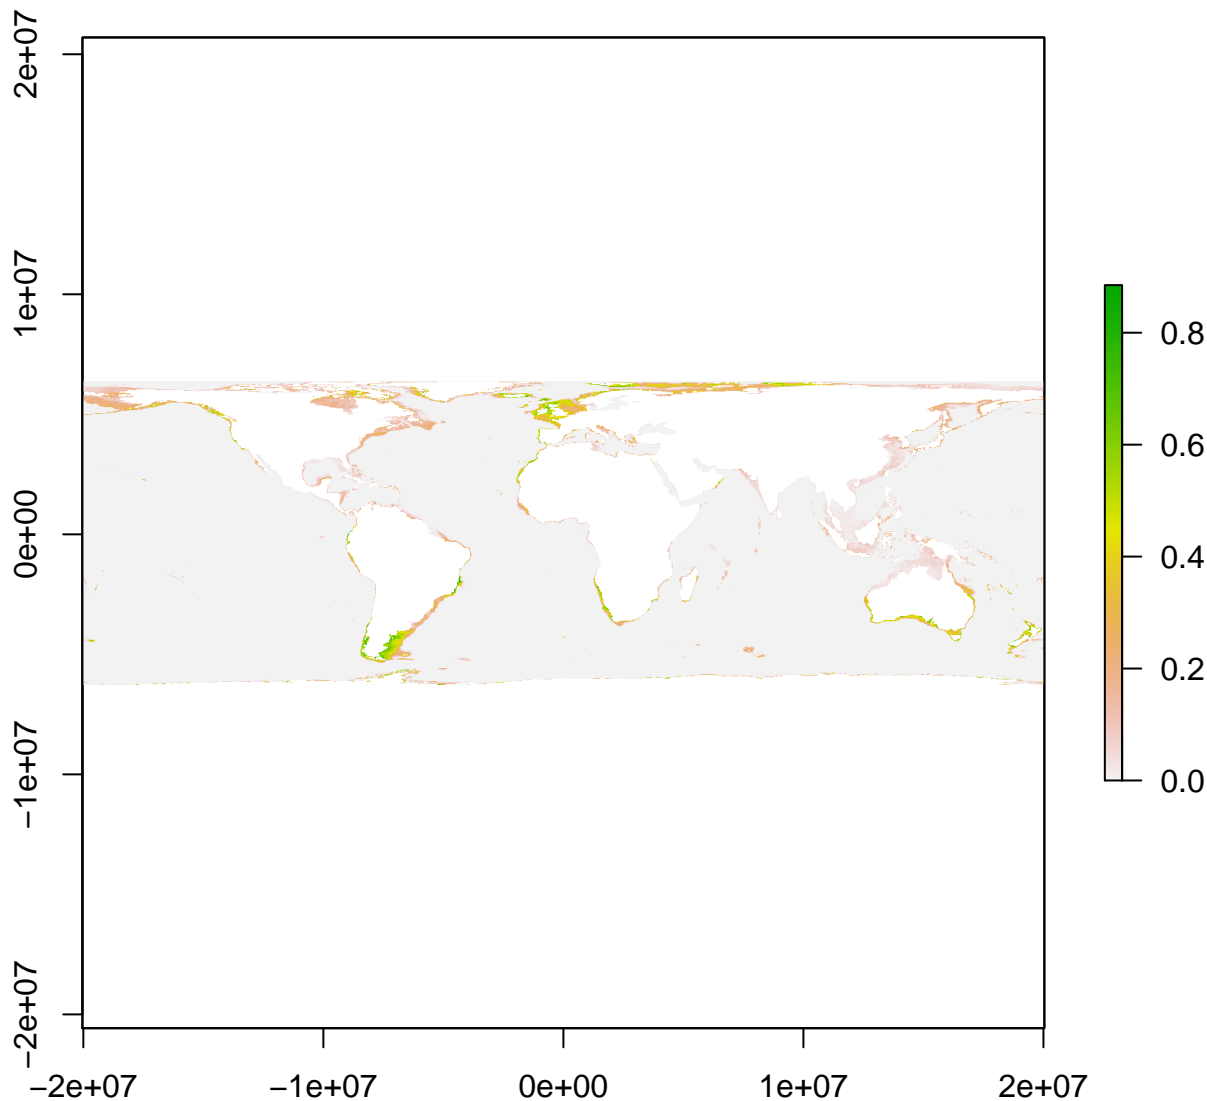

Supplement: s1 [file s1]

# Pseudo-nitzschia\_australis\_2050\_RCP8.5\_binary

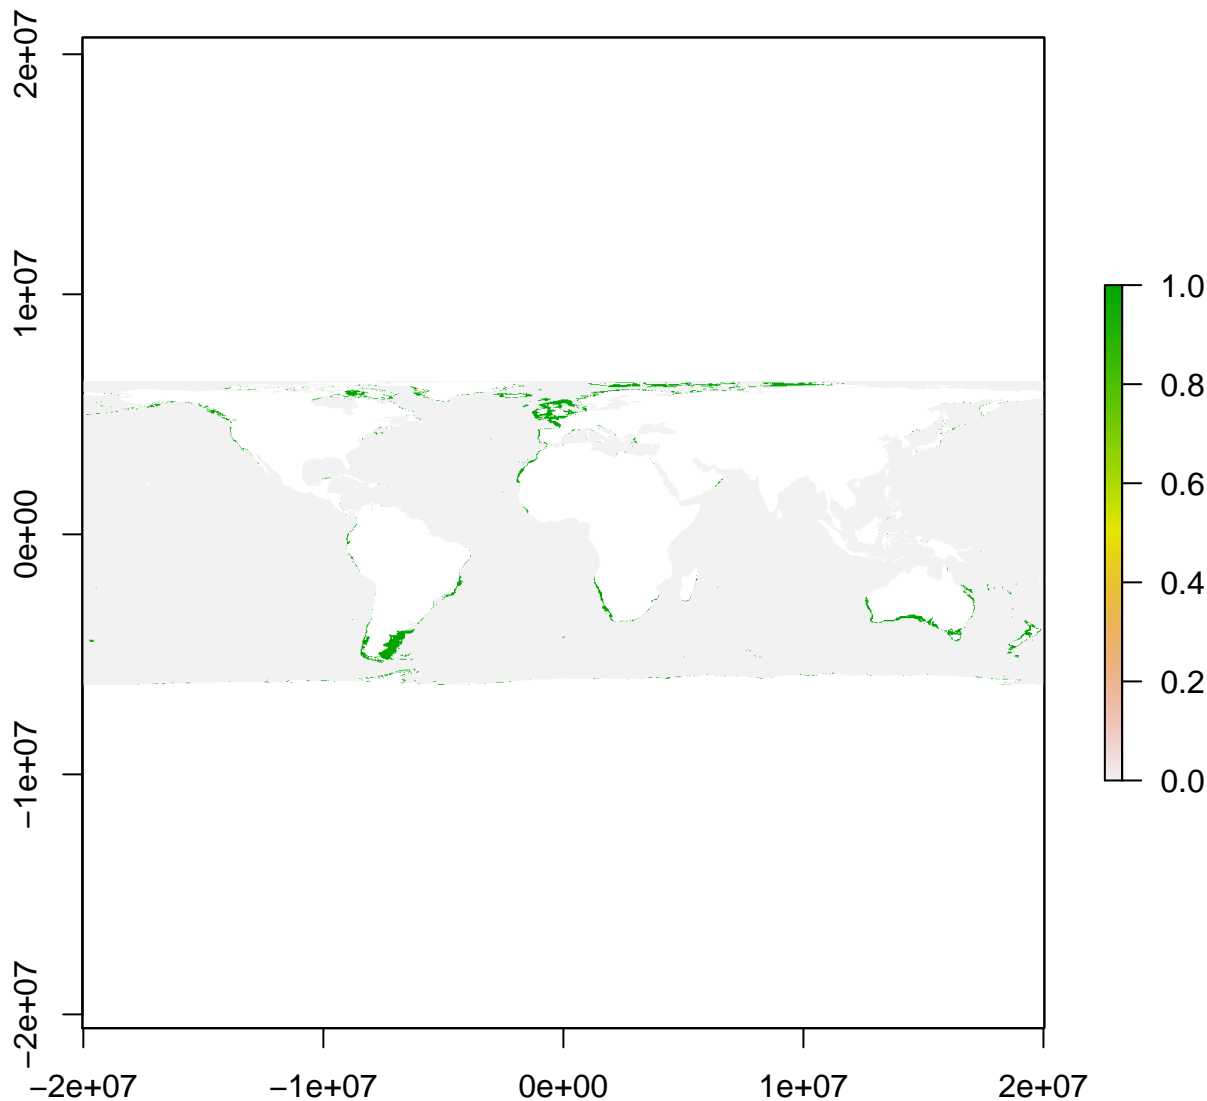

Supplement: s1 [file s1]

# Pseudo-nitzschia\_australis\_2050\_RCP2.6\_binary

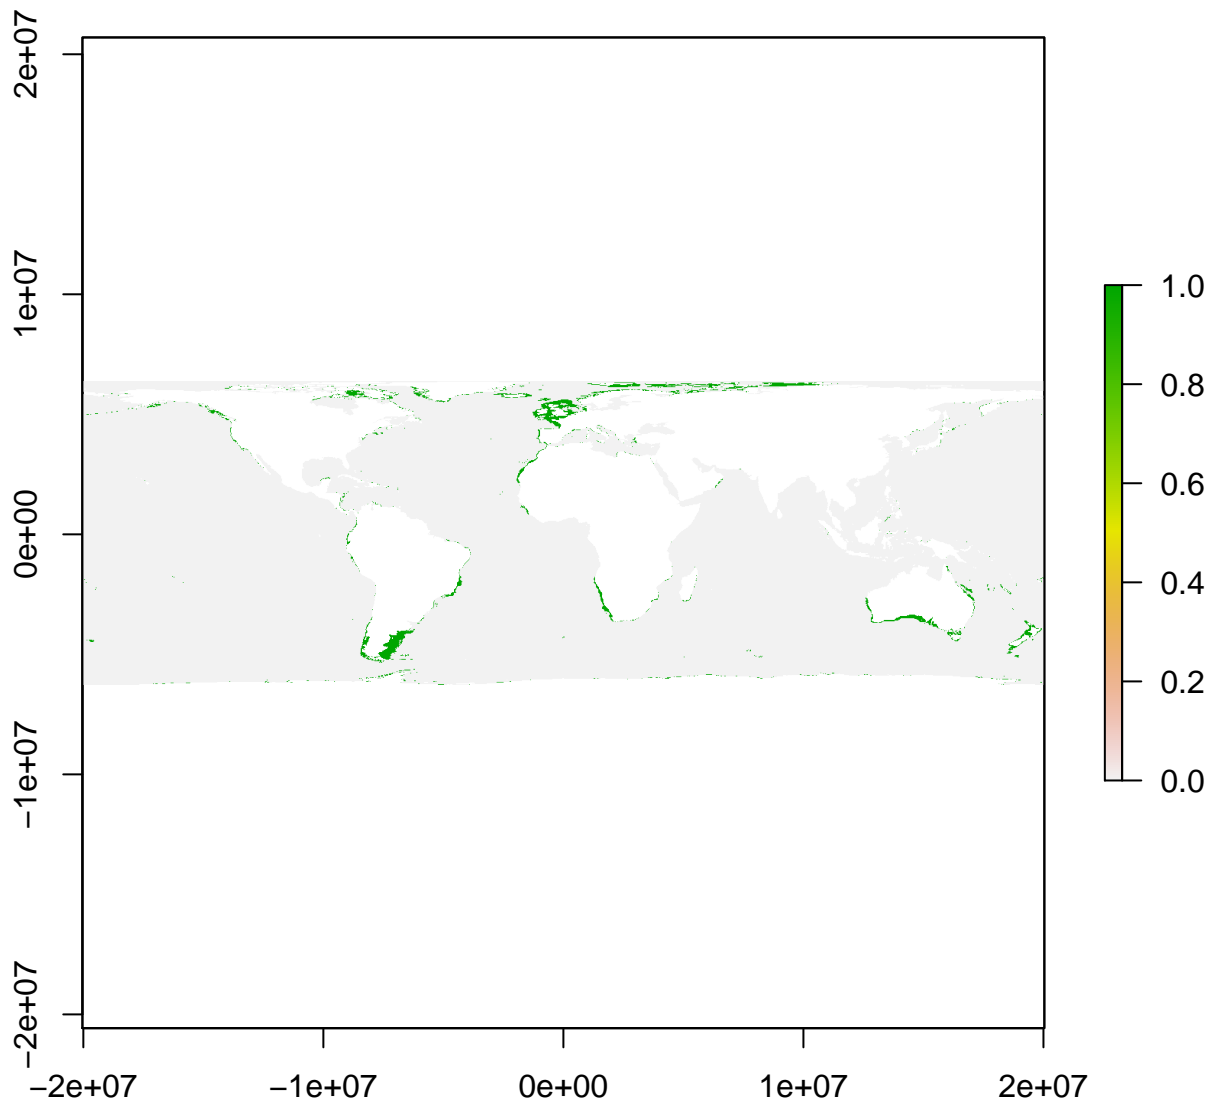

Supplement: s1 [file s1]

# Pseudo\_nitzchia\_fraudulenta\_2100\_RCP6.0

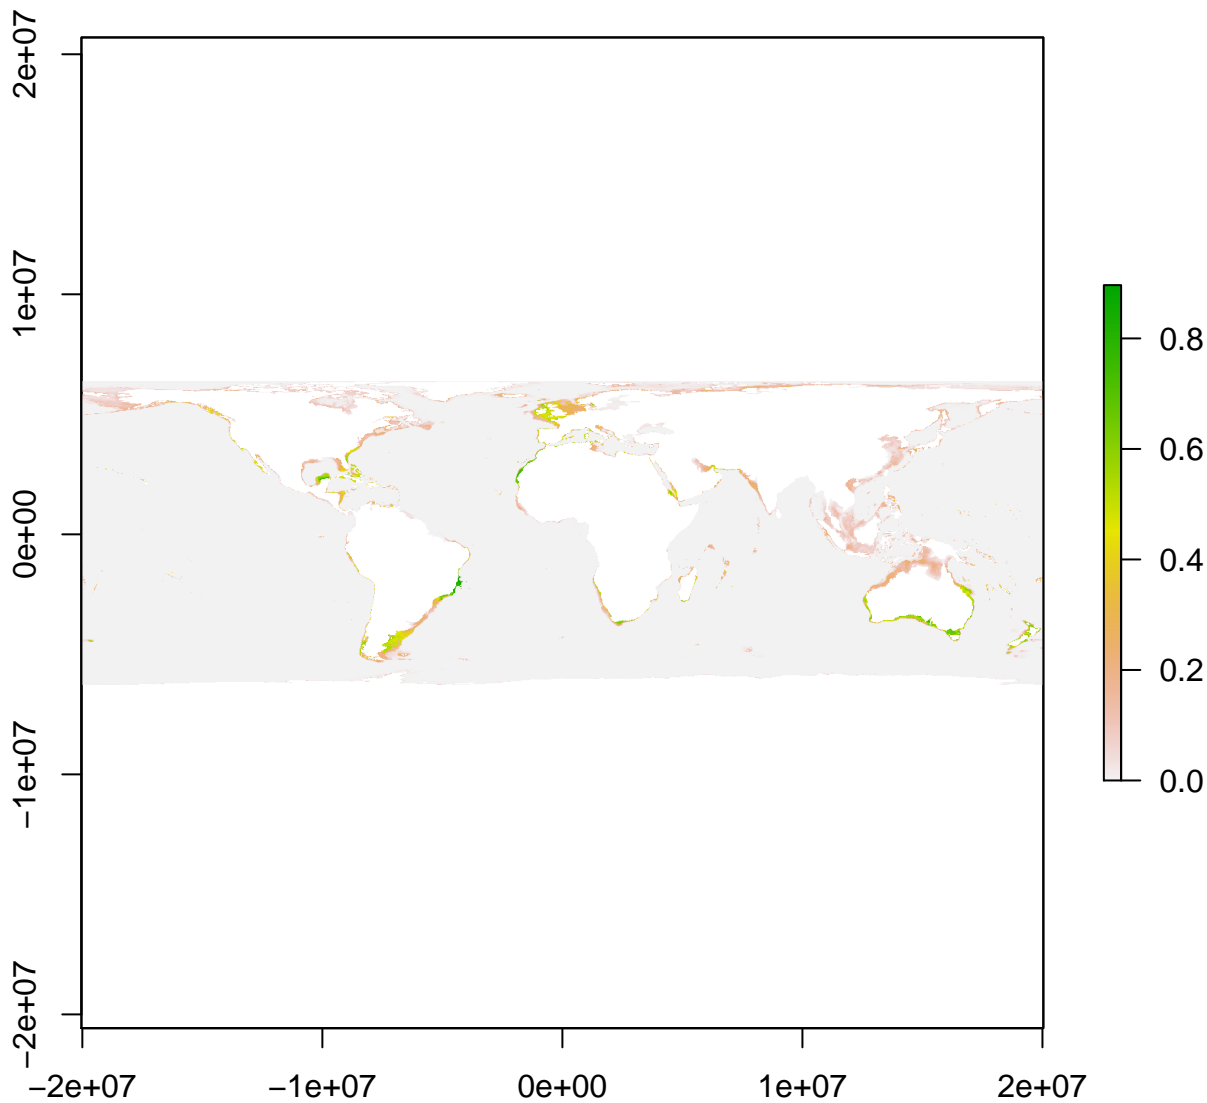

Supplement: s1 [file s1]

# Pseudo\_nitzchia\_serjata\_2050\_RCP6.0

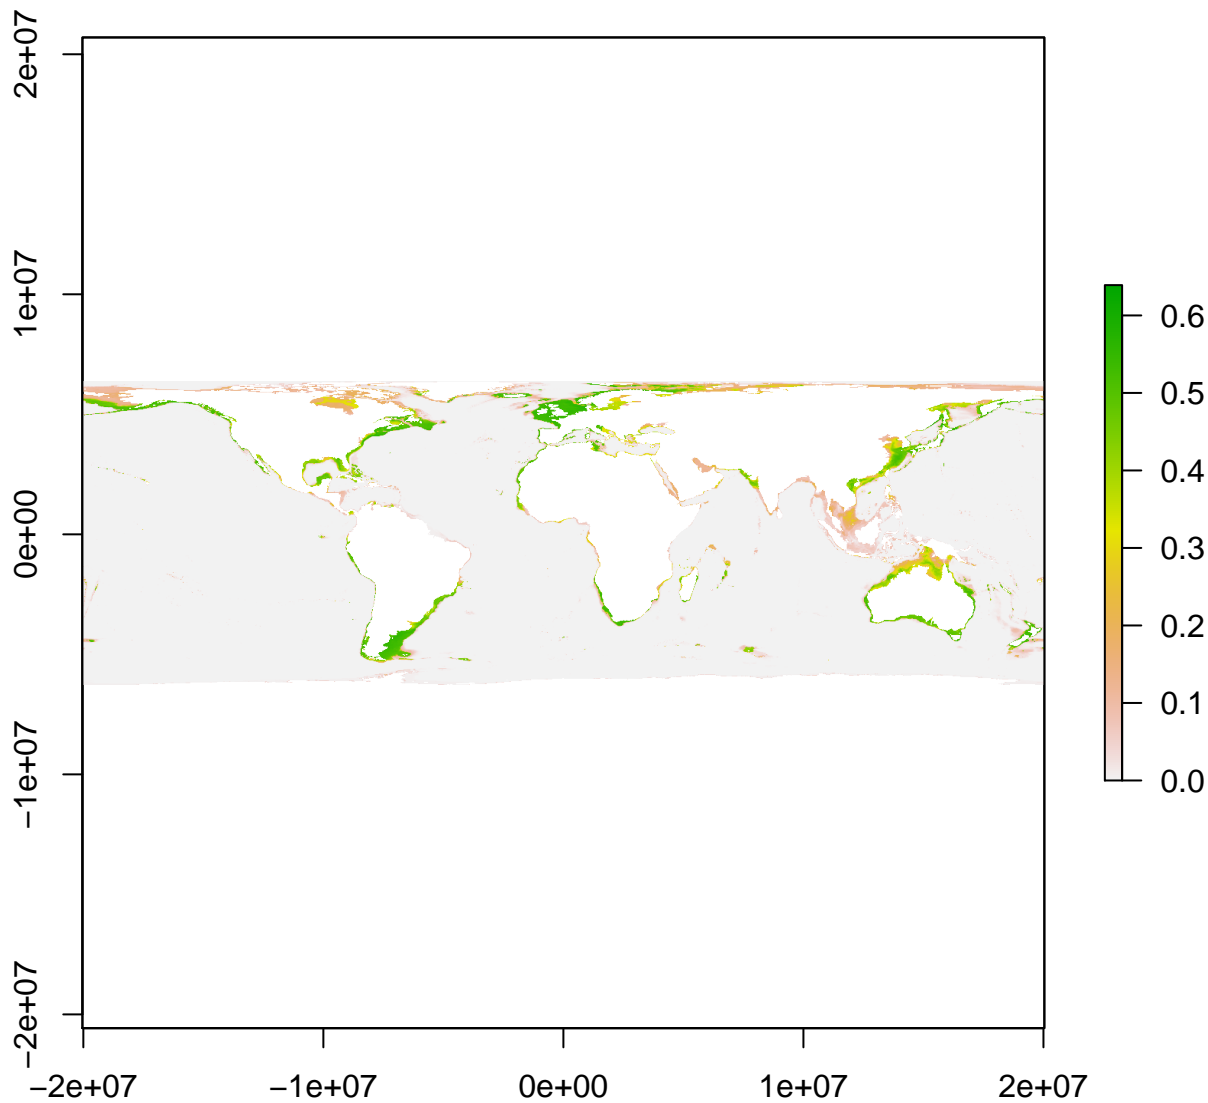

Supplement: s1 [file s1]

# Pseudo-nitzschia\_australis\_2050\_RCP4.5\_binary

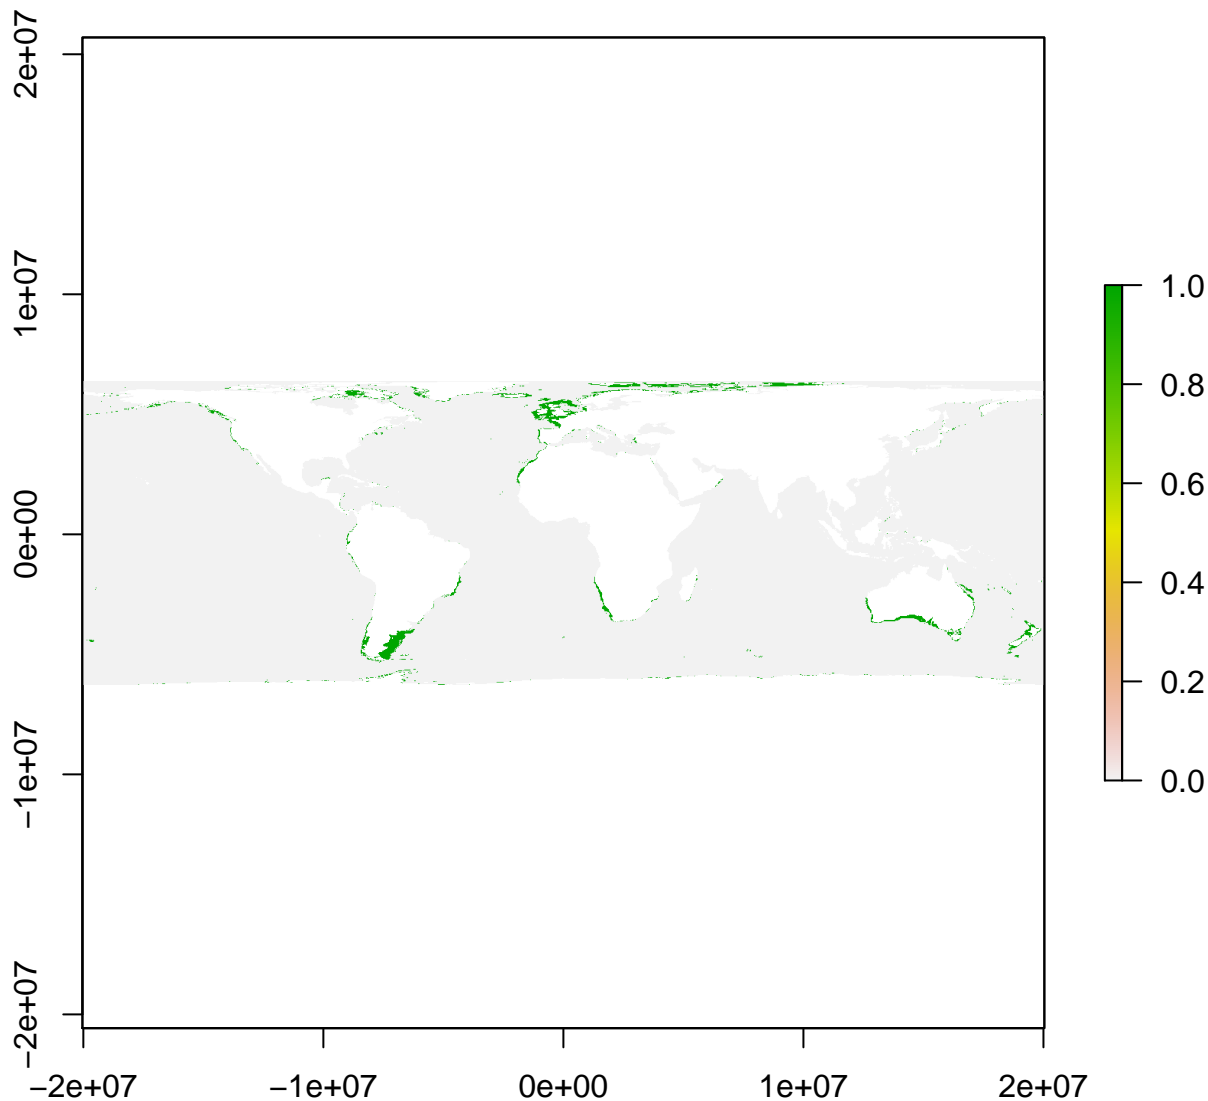

Supplement: s1 [file s1]

# Pseudo\_nitzchia\_fraudulenta\_2050\_RCP2.6\_binary

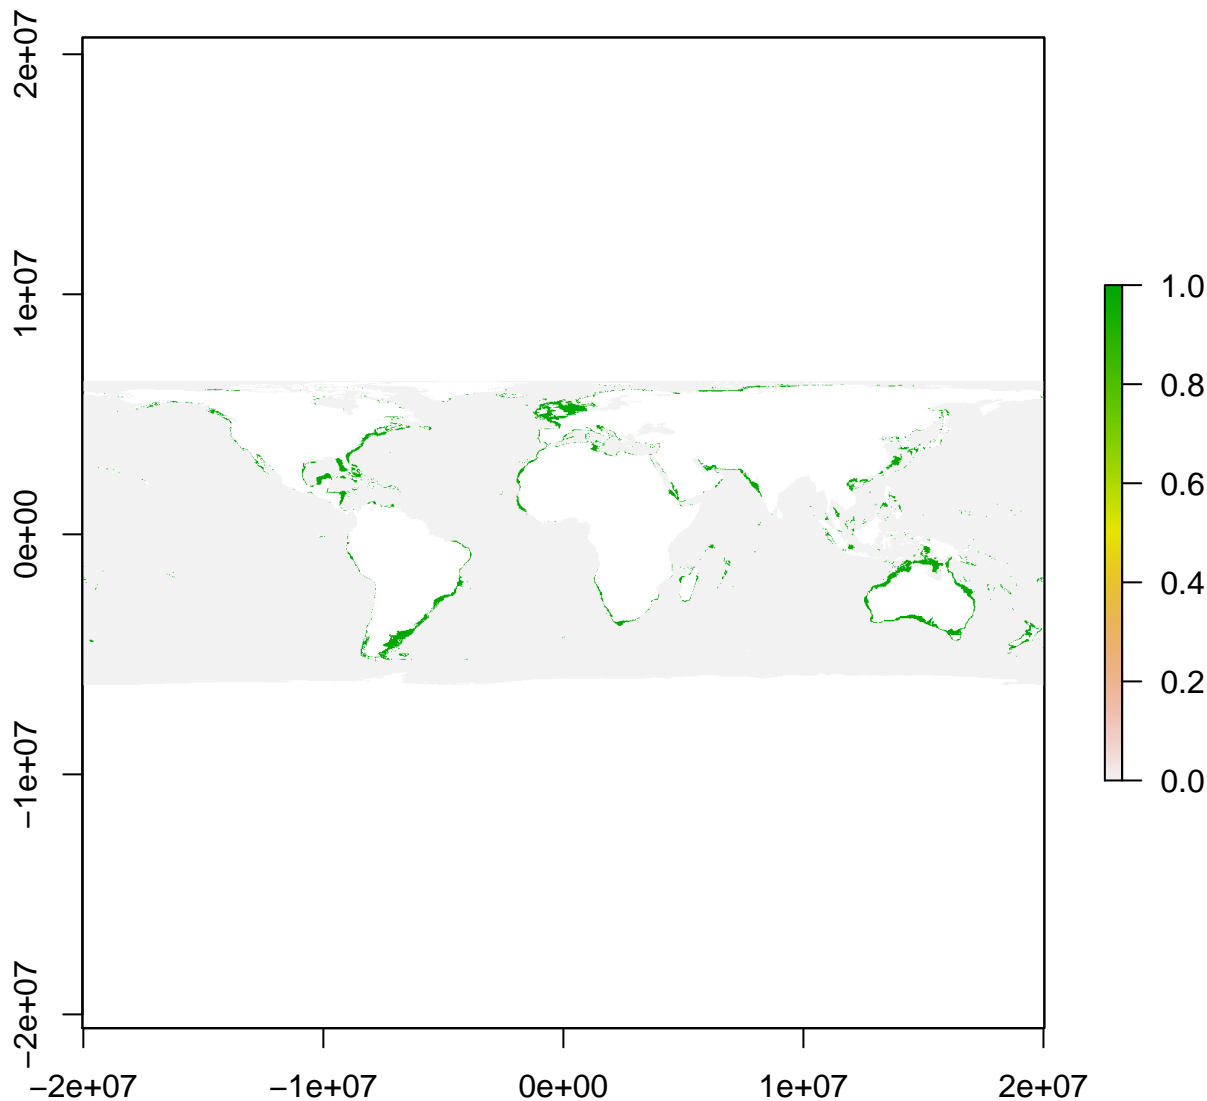

Supplement: s1 [file s1]

# Pseudo\_nitzchia\_fraudulenta\_2100\_RCP8.5\_binary

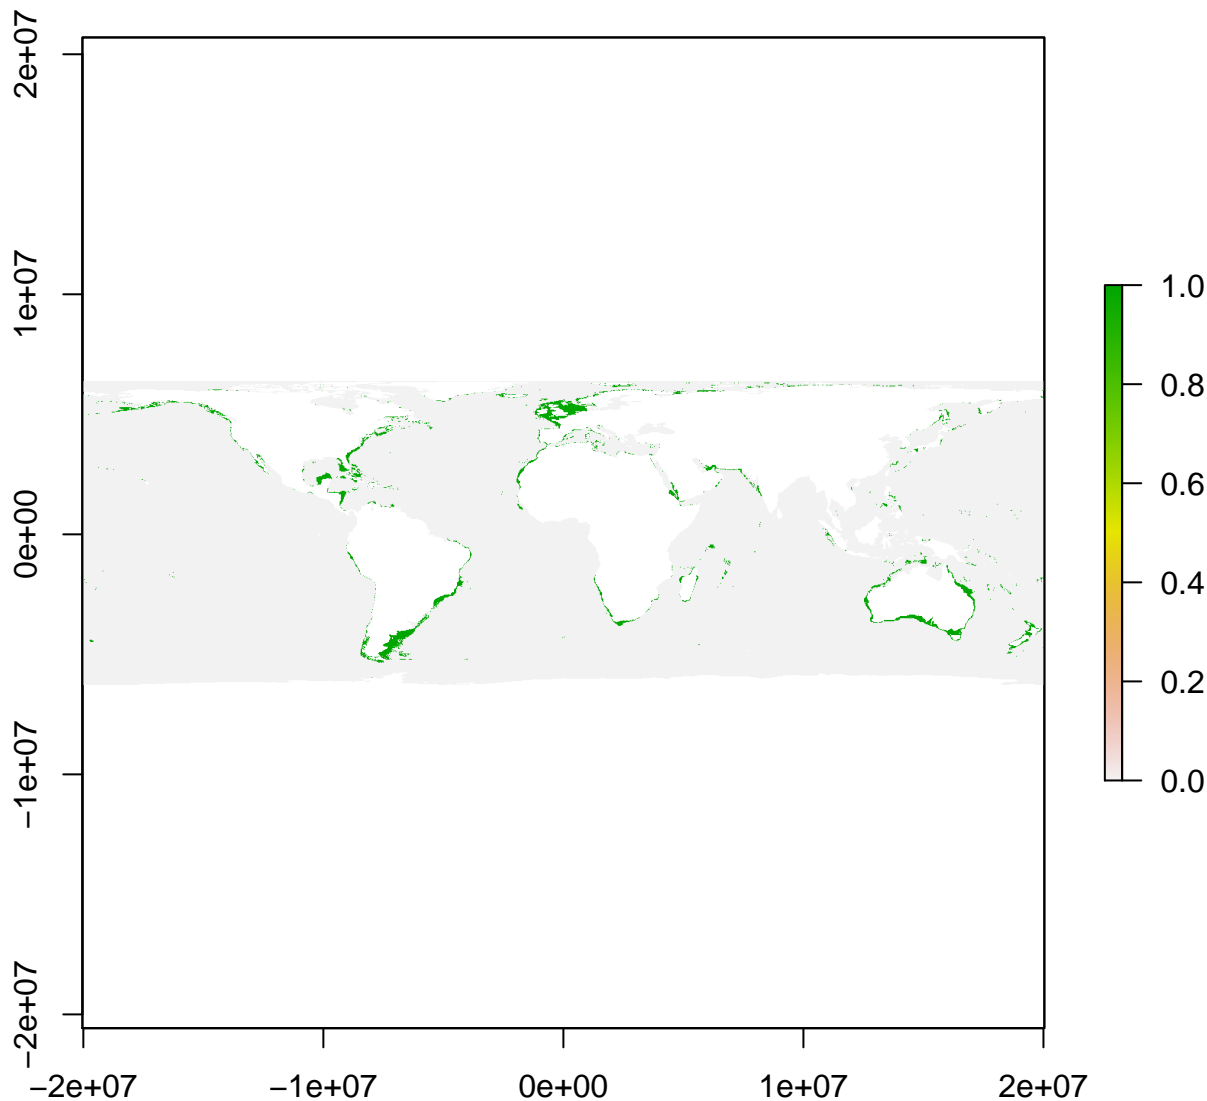

Supplement: s1 [file s1]

# Pseudo\_nitzchia\_serjata\_2100\_RCP8.5

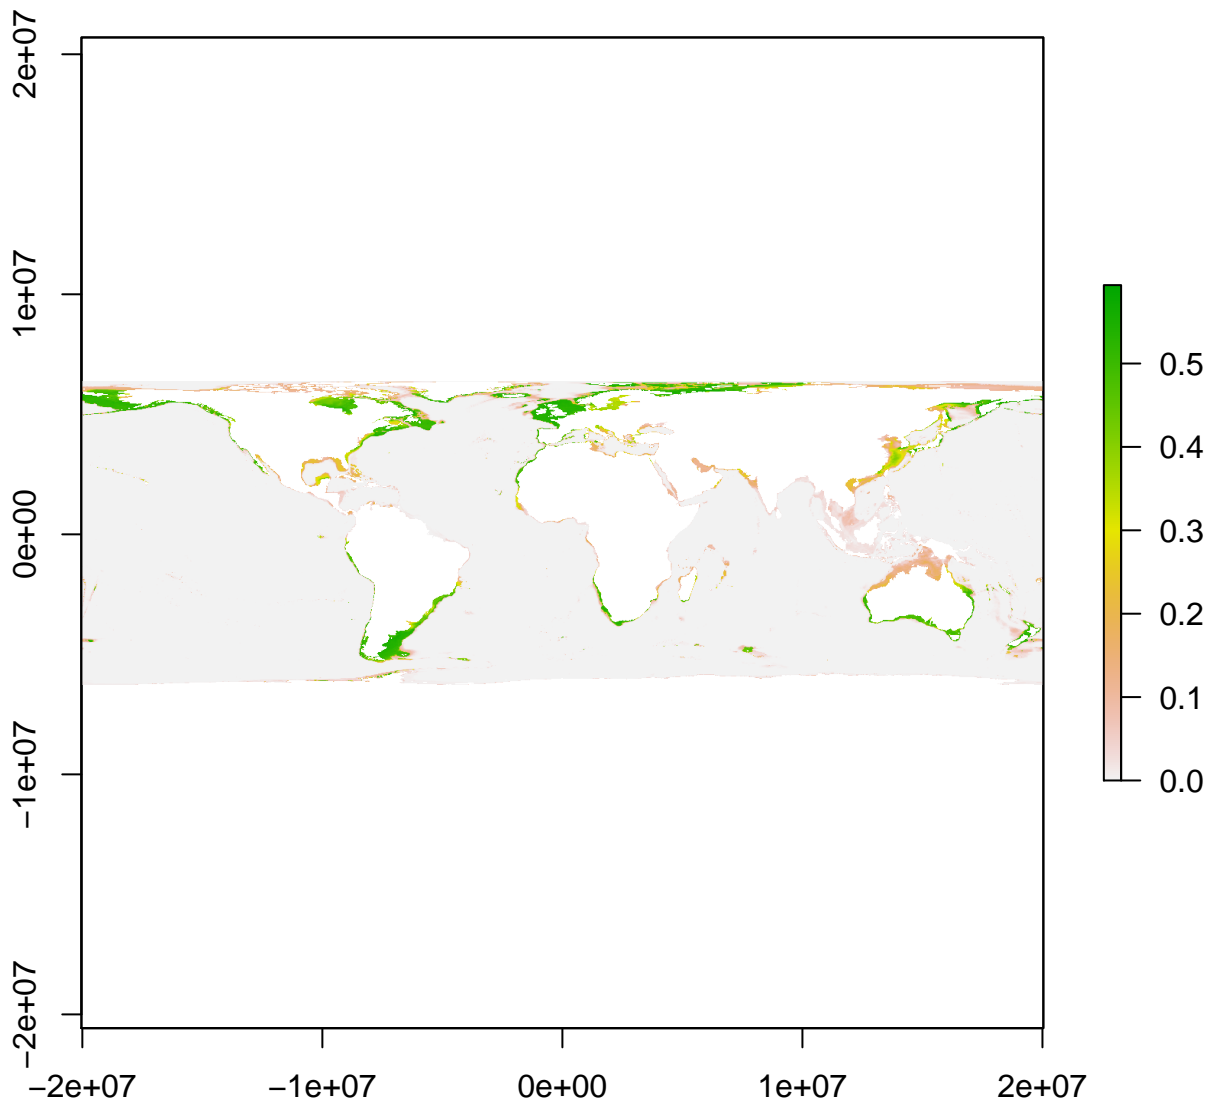

Supplement: s1 [file s1]

# Pseudo-nitzschia\_australis\_present

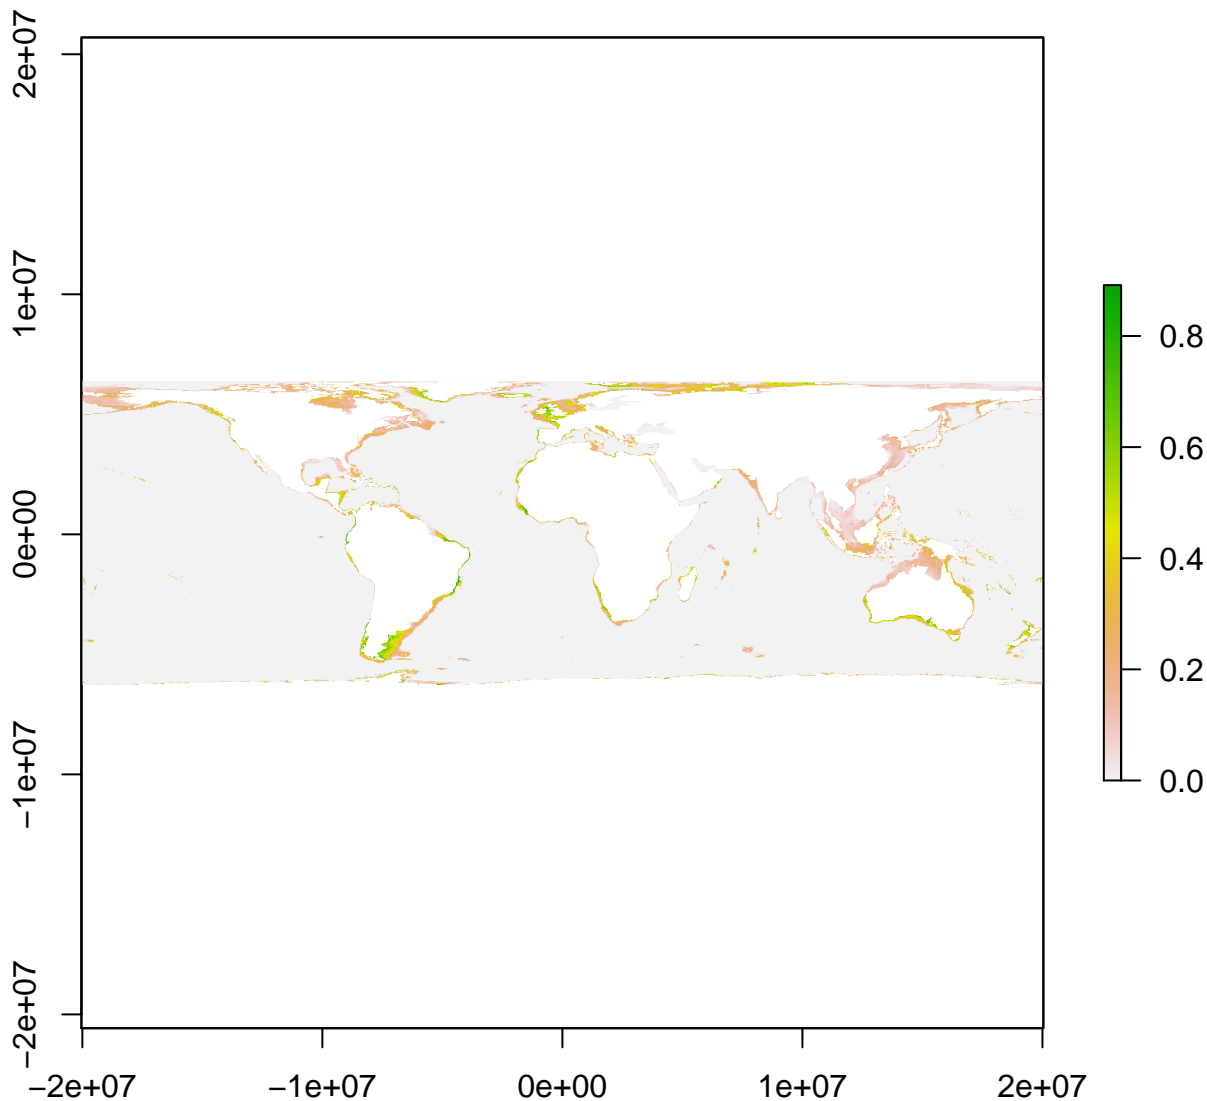

Supplement: s1 [file s1]

# Pseudo\_nitzchia\_serjata\_2100\_RCP2.6

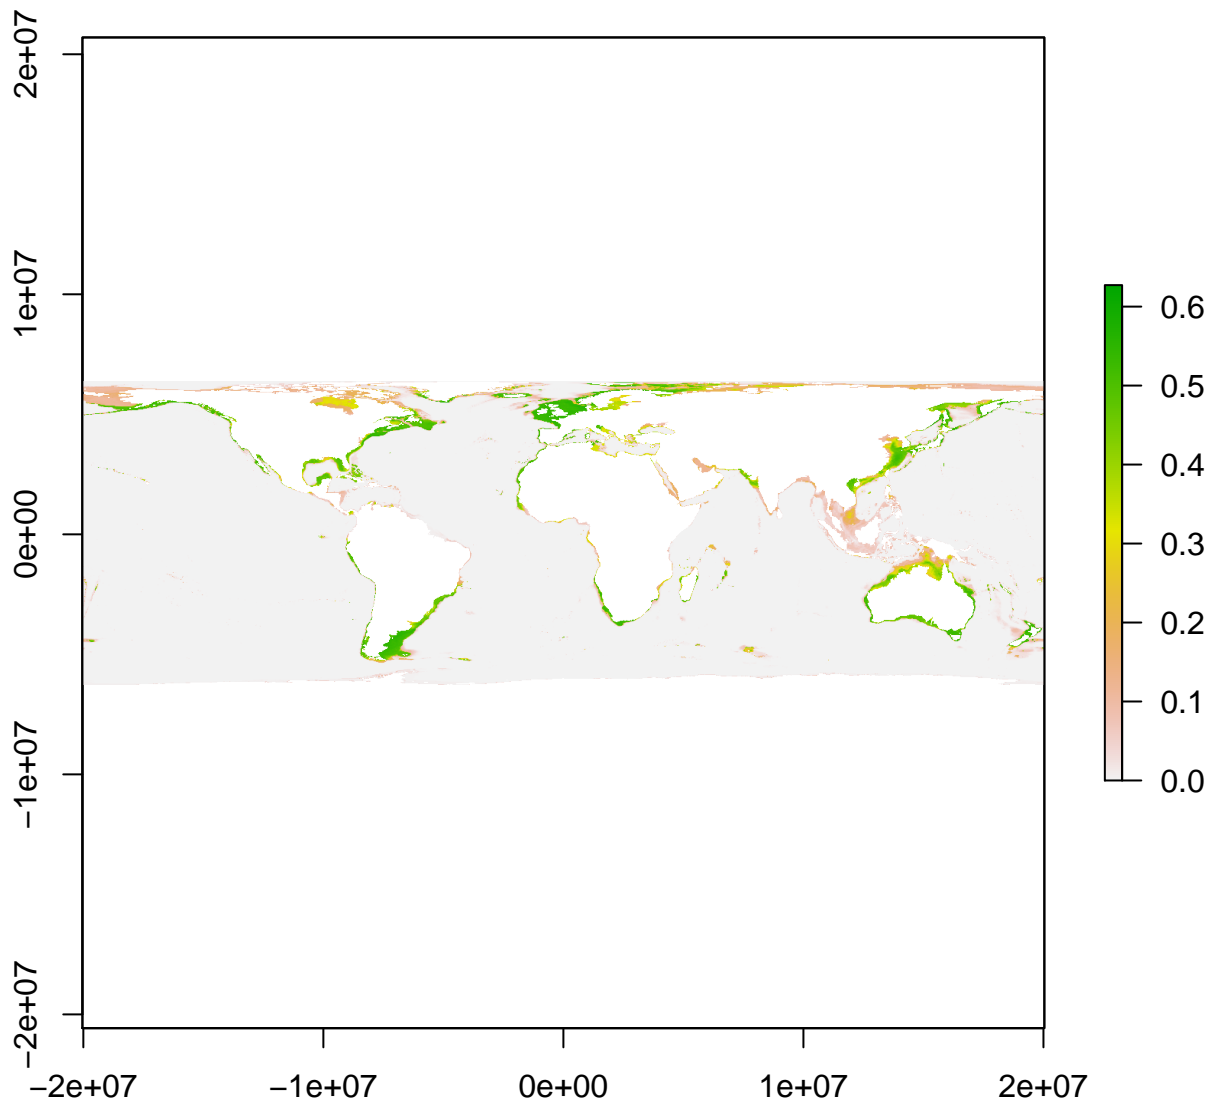

Supplement: s1 [file s1]

# Pseudo\_nitzchia\_fraudulenta\_2050\_RCP4.5

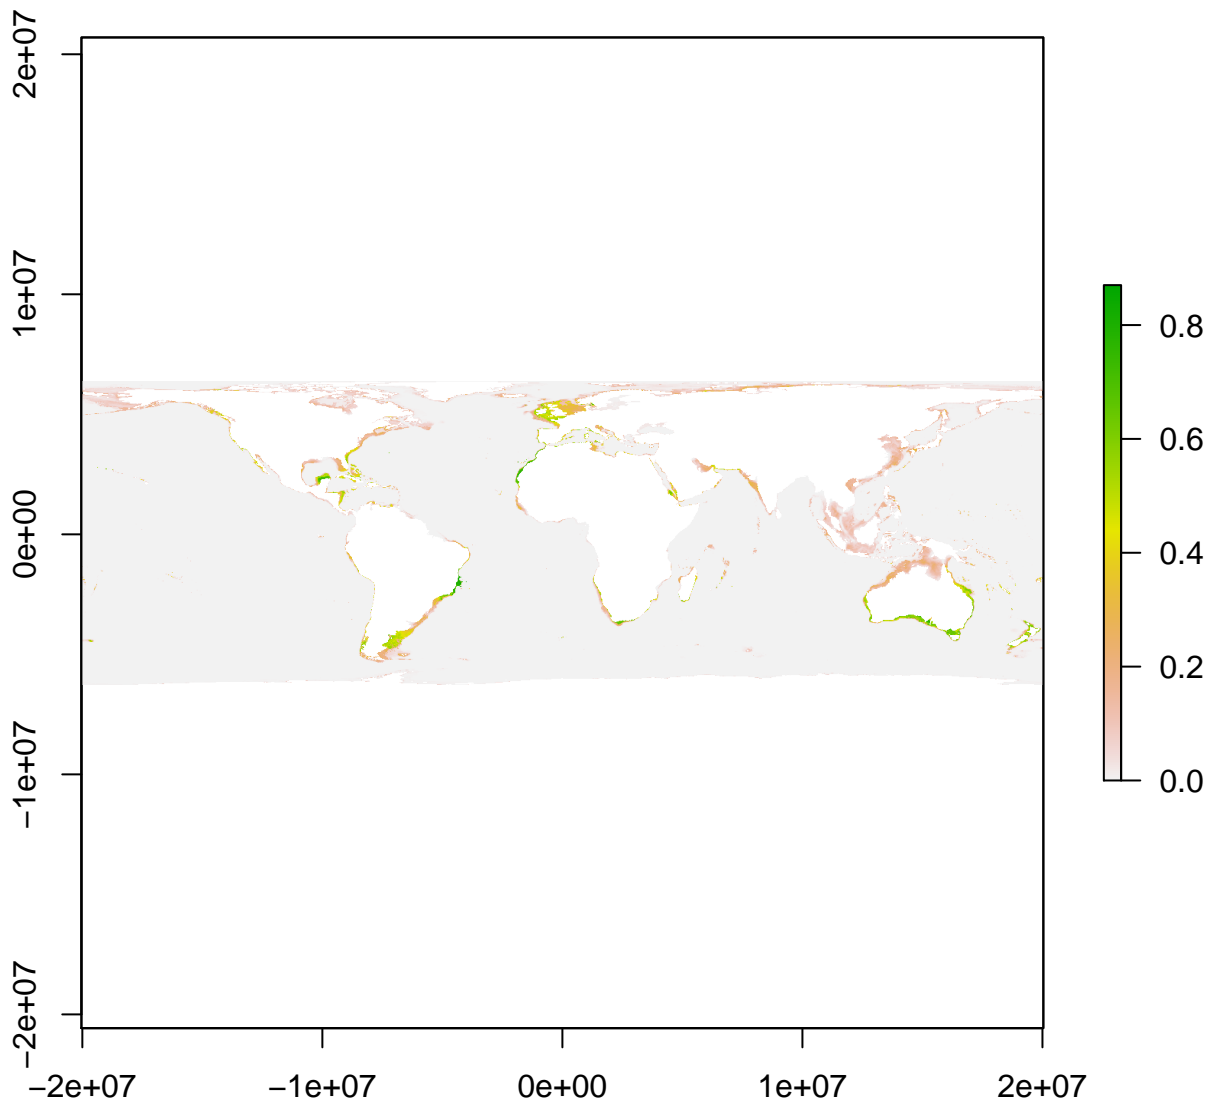

Supplement: s1 [file s1]

**Pseudo\_nitzchia\_serjata\_2050\_RCP6.0\_binary**

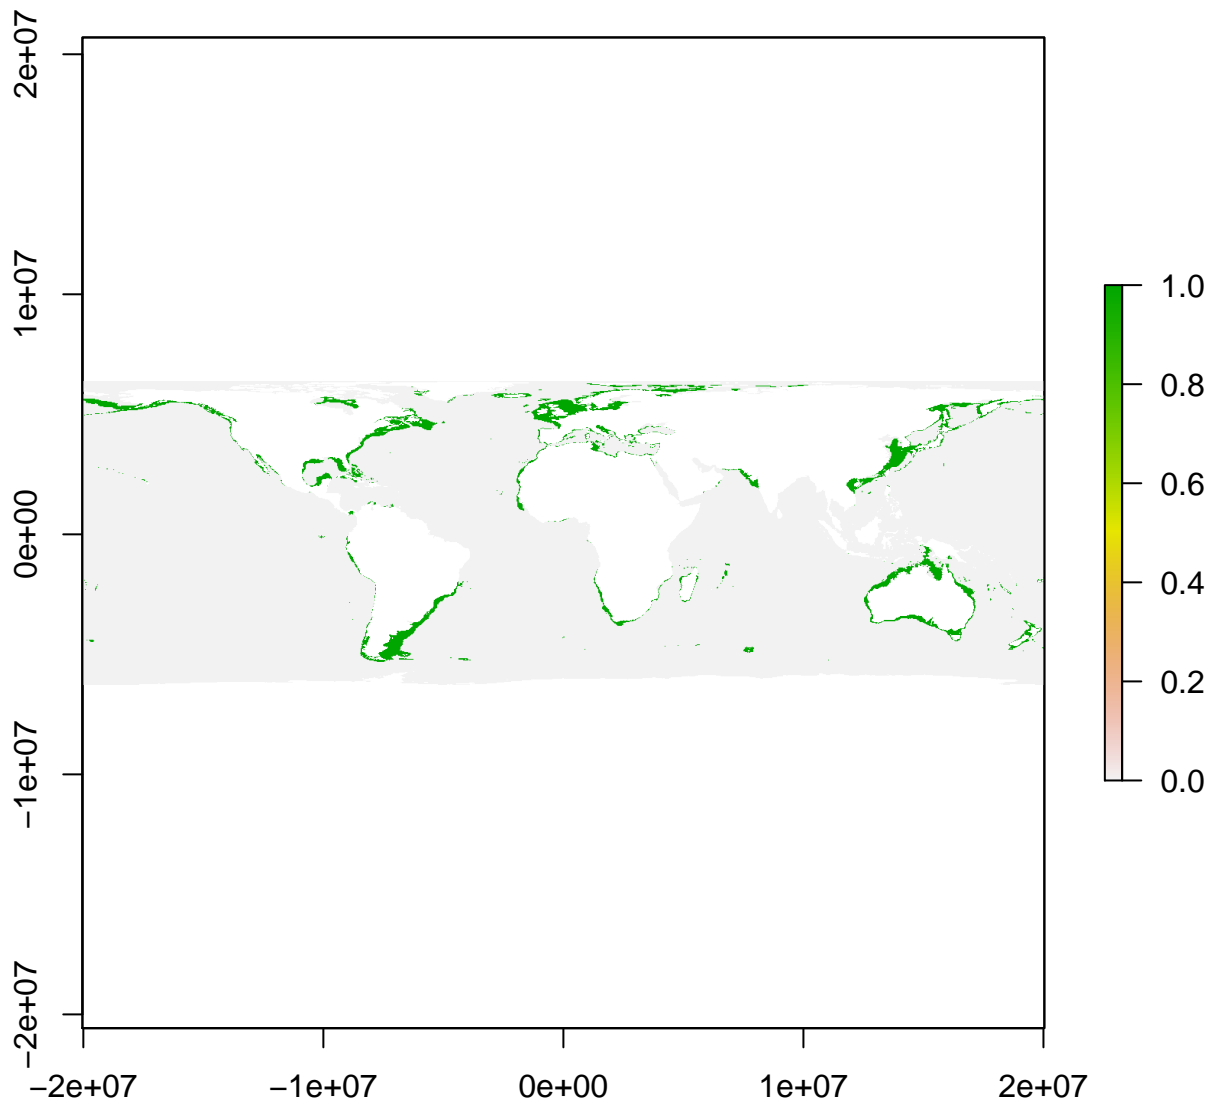

Supplement: s1 [file s1]

# Pseudo\_nitzchia\_serjata\_2100\_RCP2.6\_binary

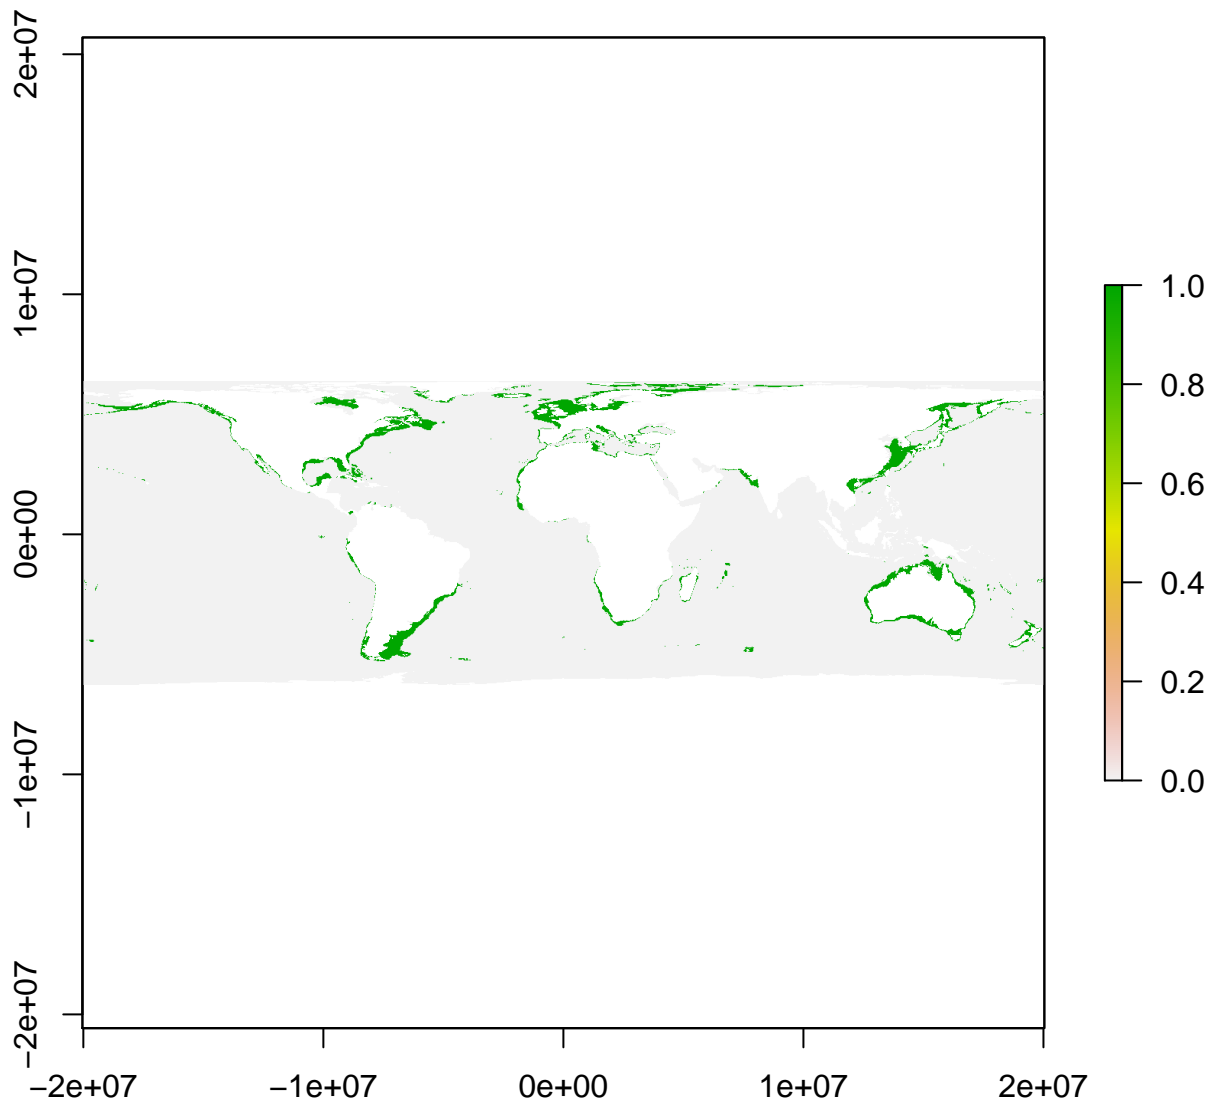

Supplement: s1 [file s1]

# Pseudo\_nitzchia\_fraudulenta\_2100\_RCP2.6

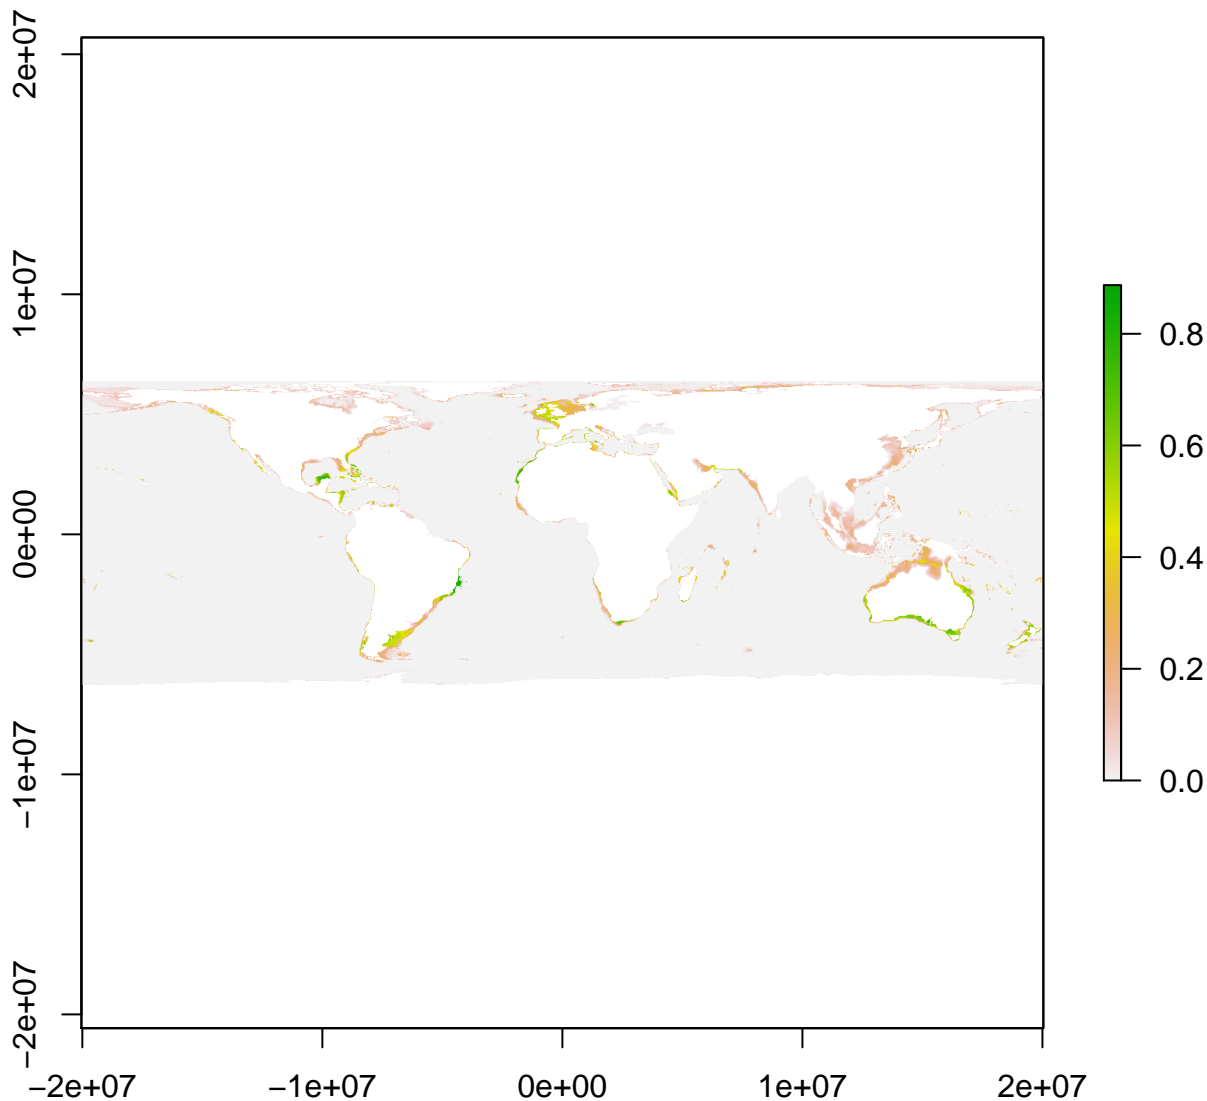

Supplement: s1 [file s1]

# Pseudo-nitzschia\_australis\_2050\_RCP2.6

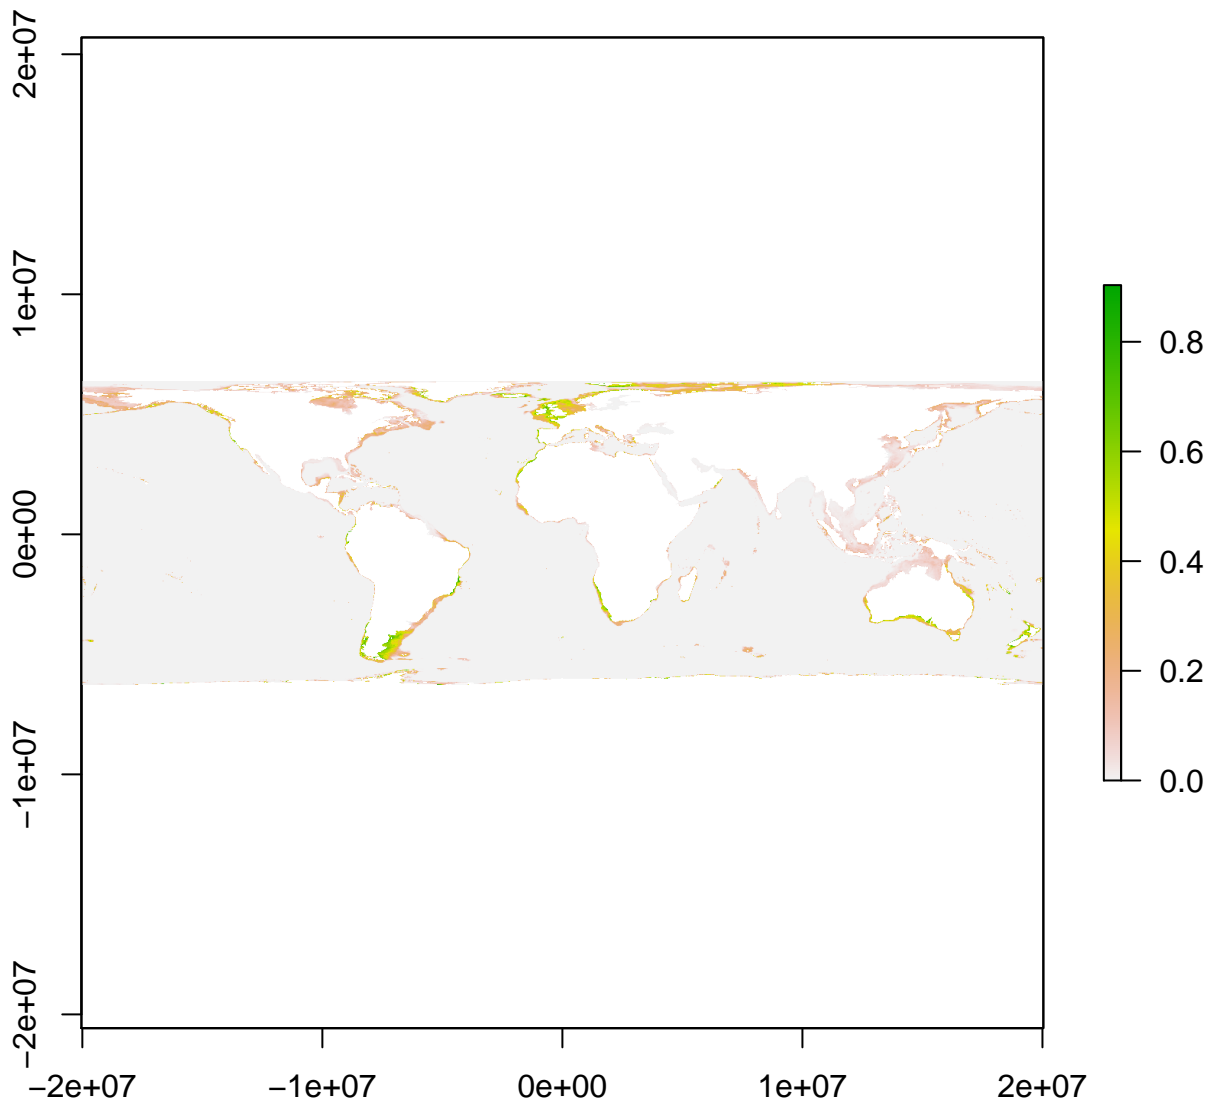

Supplement: s1 [file s1]

# Pseudo\_nitzchia\_fraudulenta\_2050\_RCP4.5\_binary

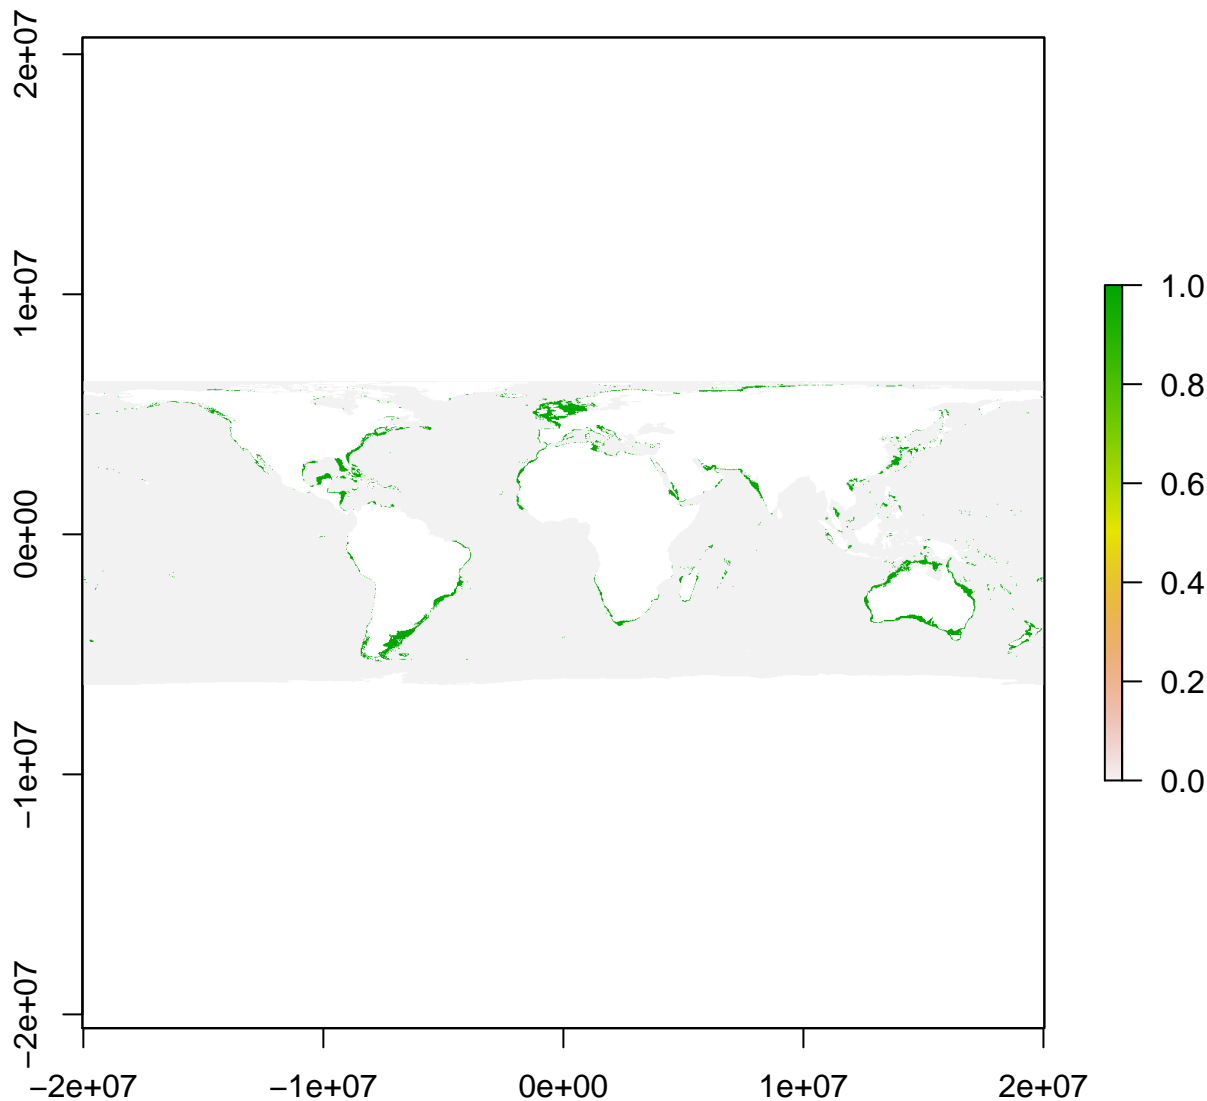

Supplement: s1 [file s1]

**Pseudo\_nitzchia\_serjata\_2050\_RCP2.6\_binary**

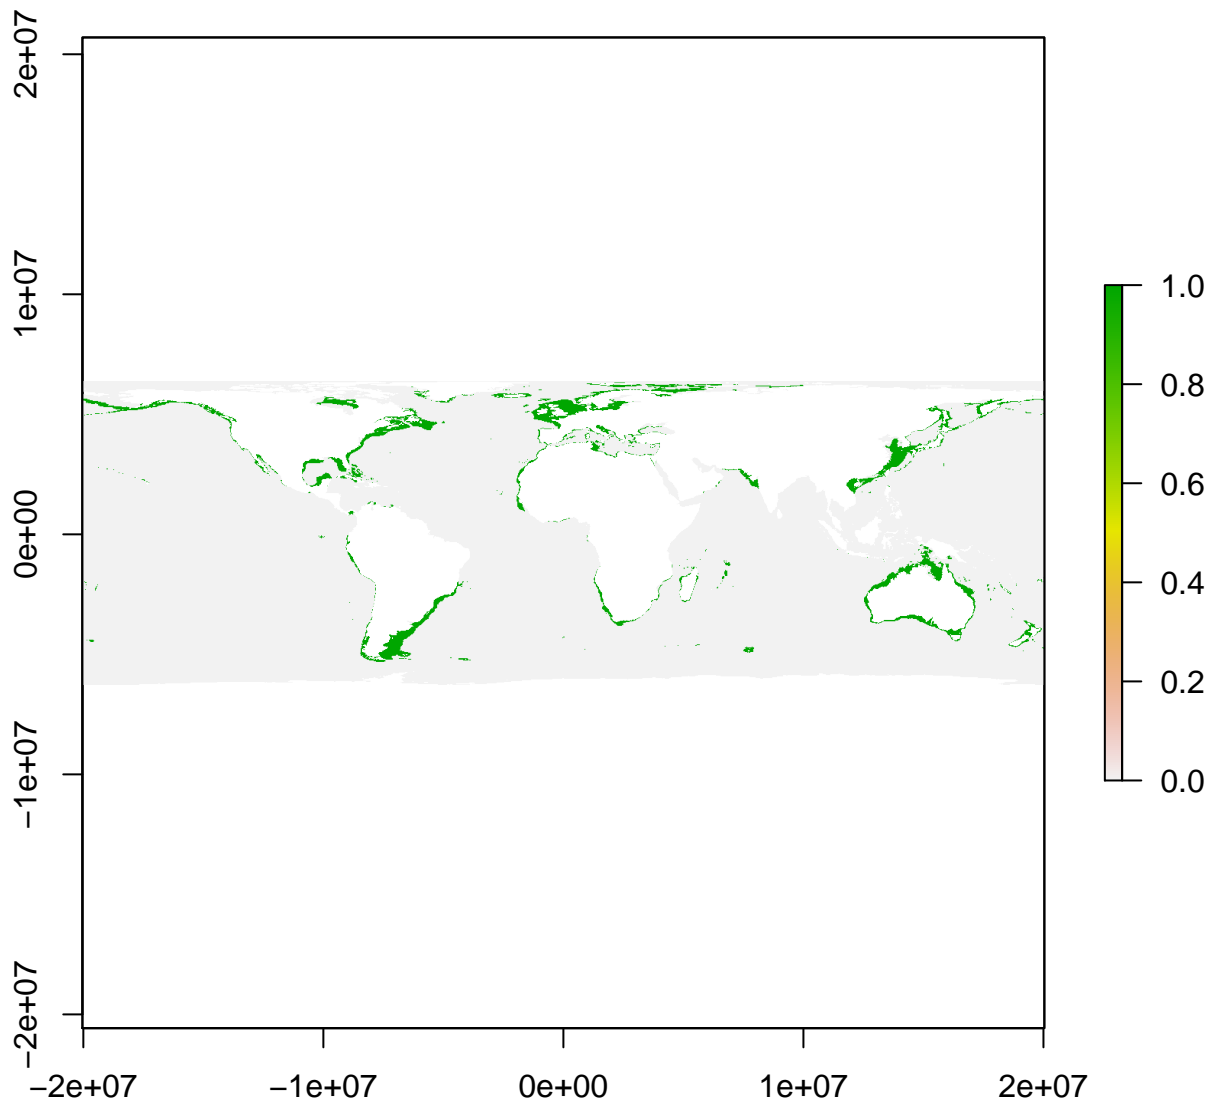

Supplement: s1 [file s1]

# Pseudo\_nitzchia\_fraudulenta\_2100\_RCP8.5

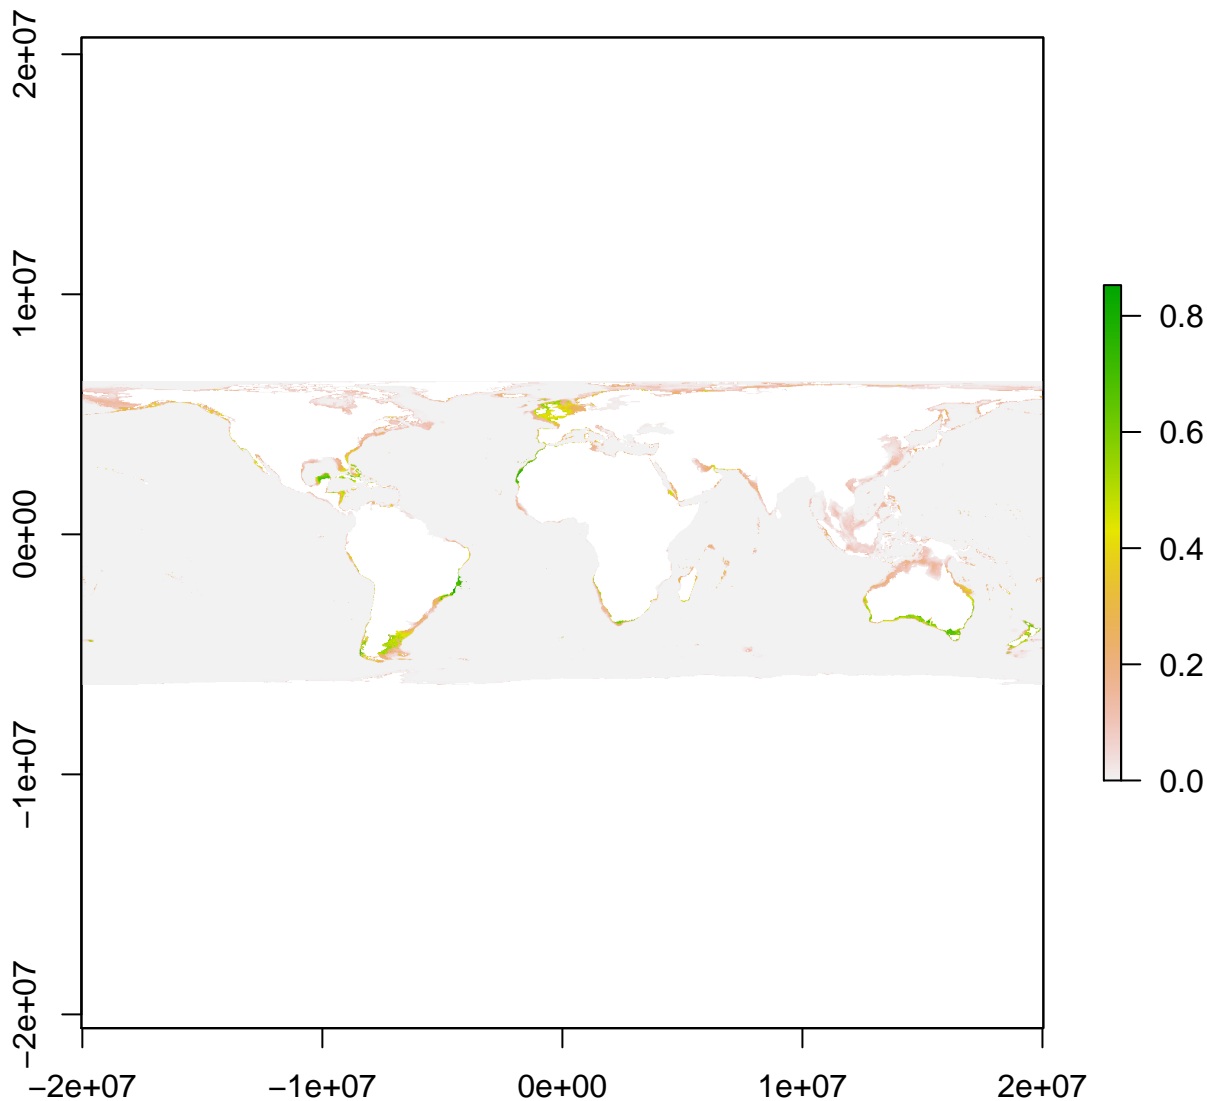

Supplement: s1 [file s1]

# Pseudo-nitzschia\_australis\_2050\_RCP6.0\_binary

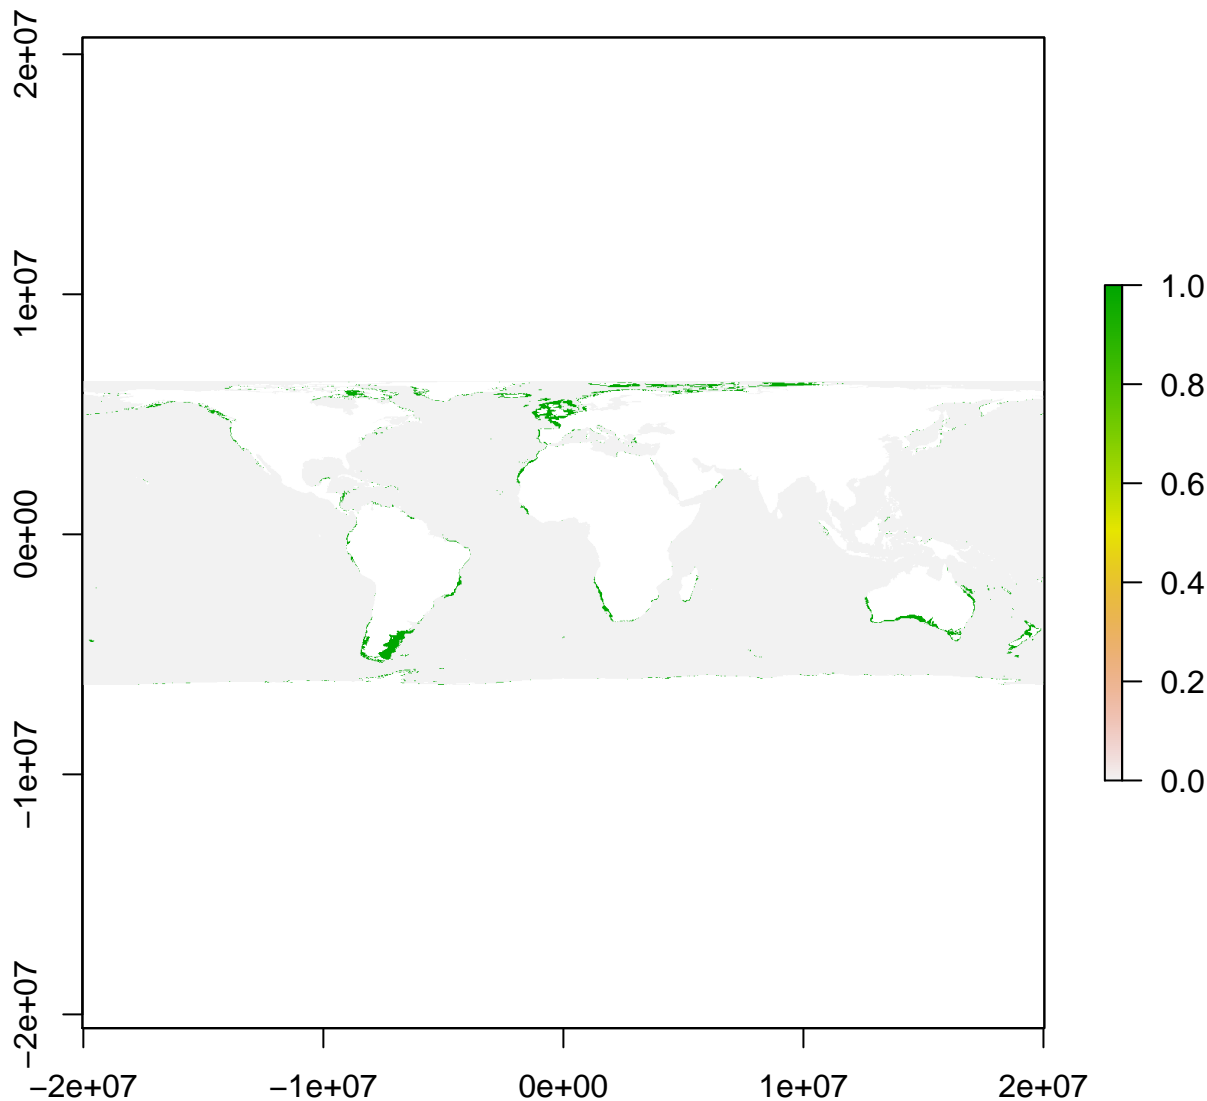

Supplement: s1 [file s1]

# Pseudo\_nitzchia\_fraudulenta\_2050\_RCP8.5

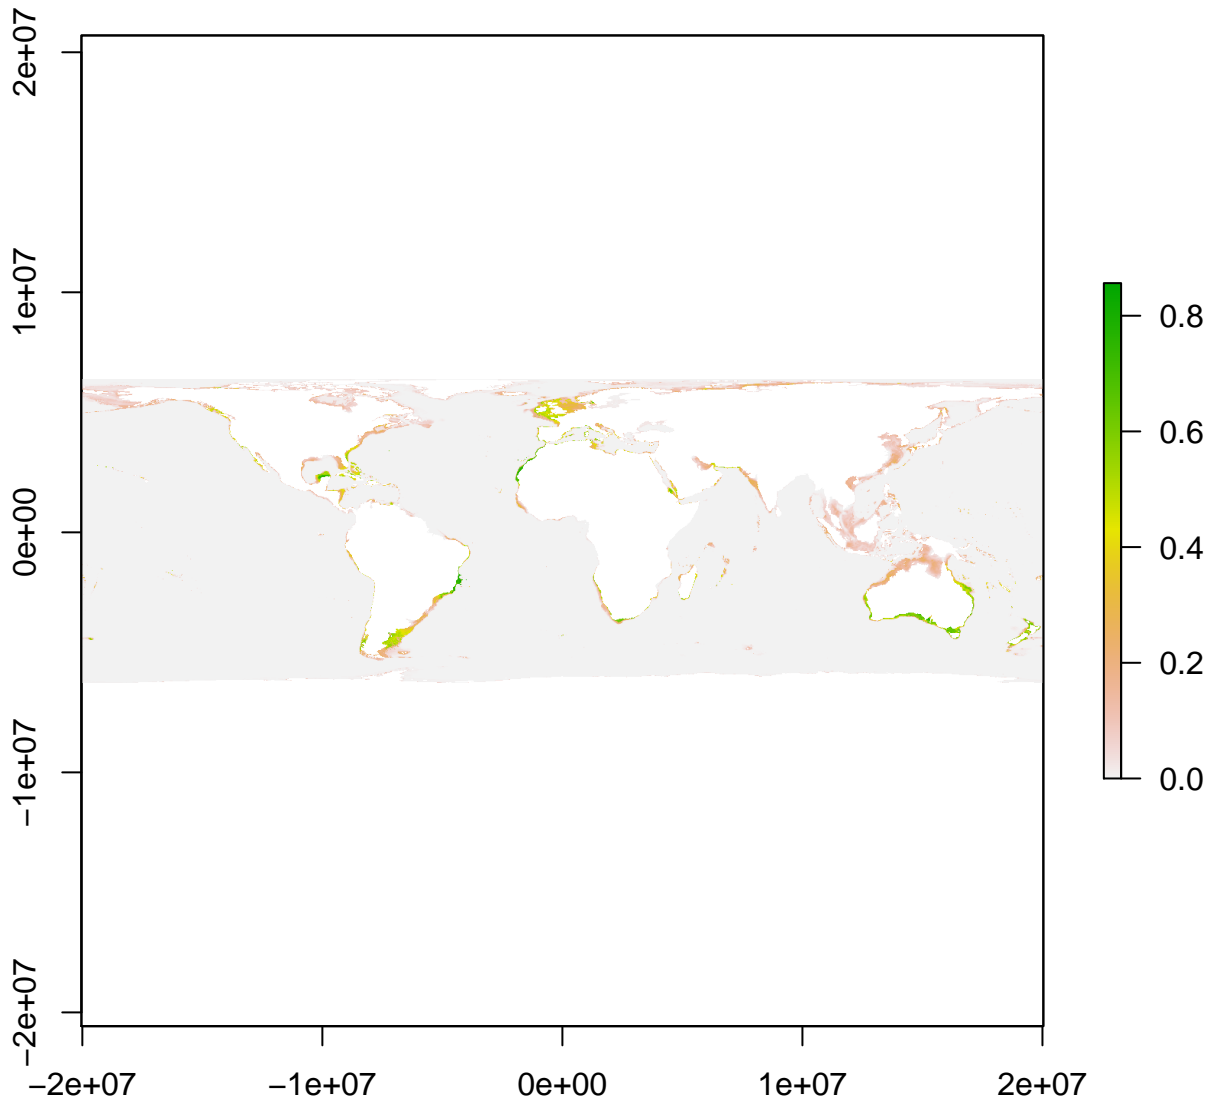

Supplement: s1 [file s1]

# Pseudo-nitzschia\_australis\_2100\_RCP4.5

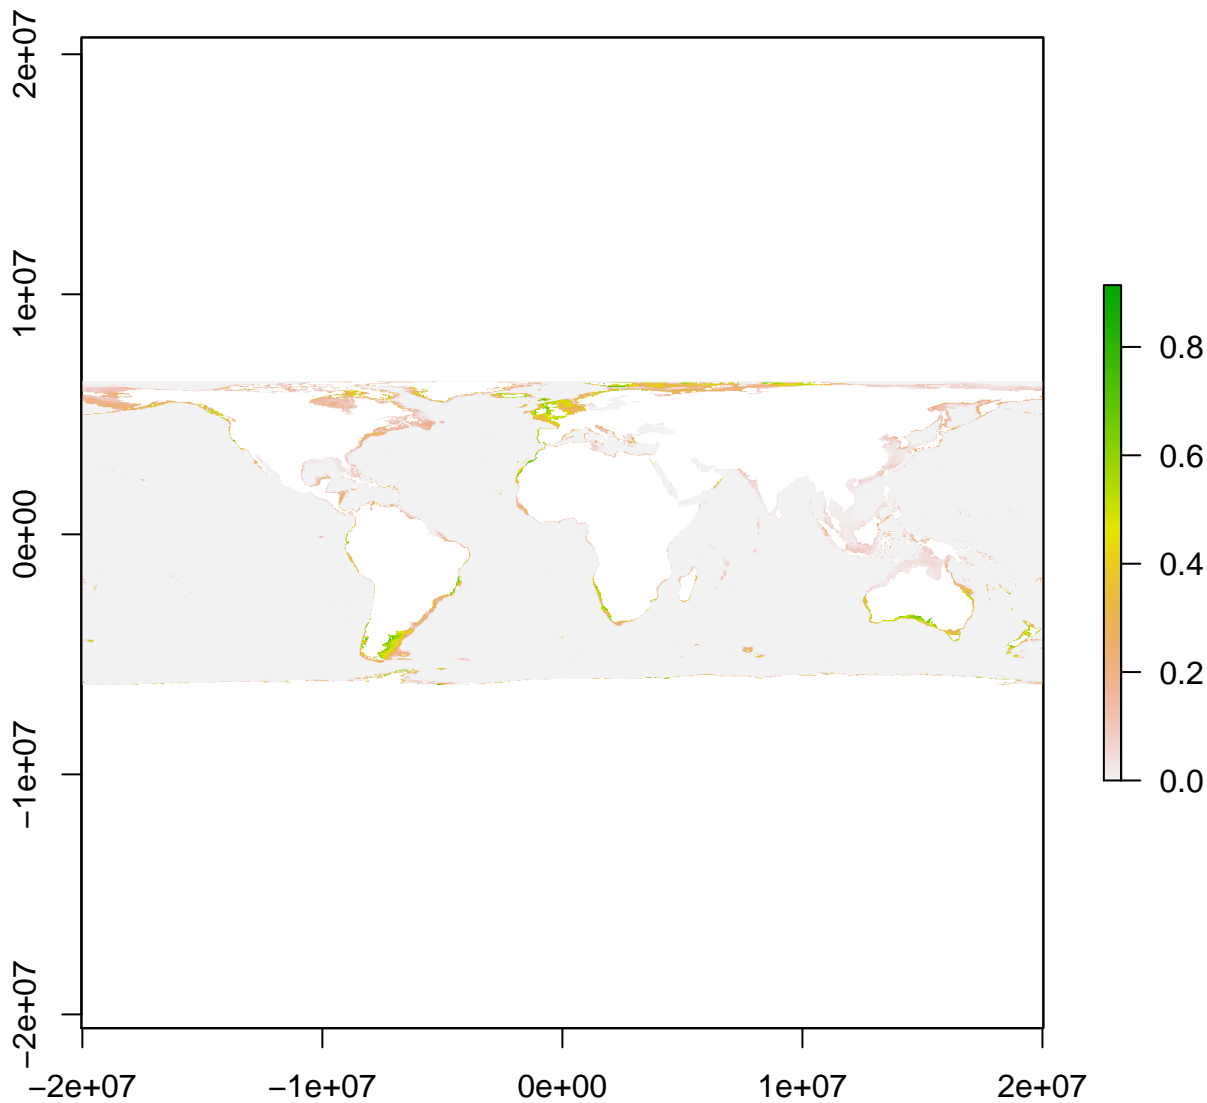

Supplement: s1 [file s1]

# Pseudo\_nitzchia\_seriata\_2100\_RCP4.5

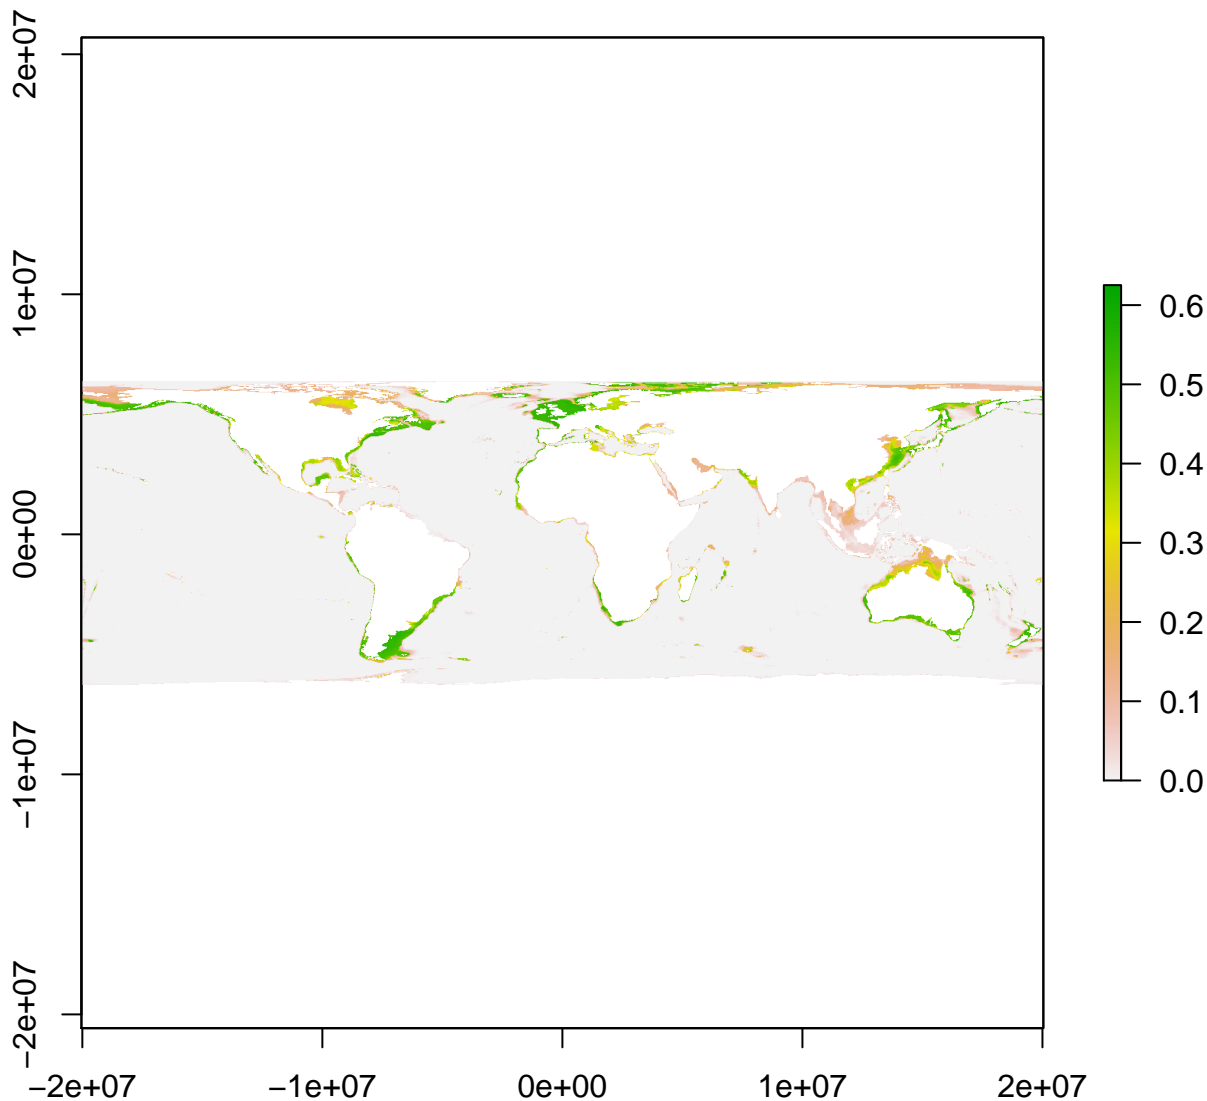

Supplement: s1 [file s1]

# Pseudo\_nitzchia\_seriata\_2050\_RCP2.6

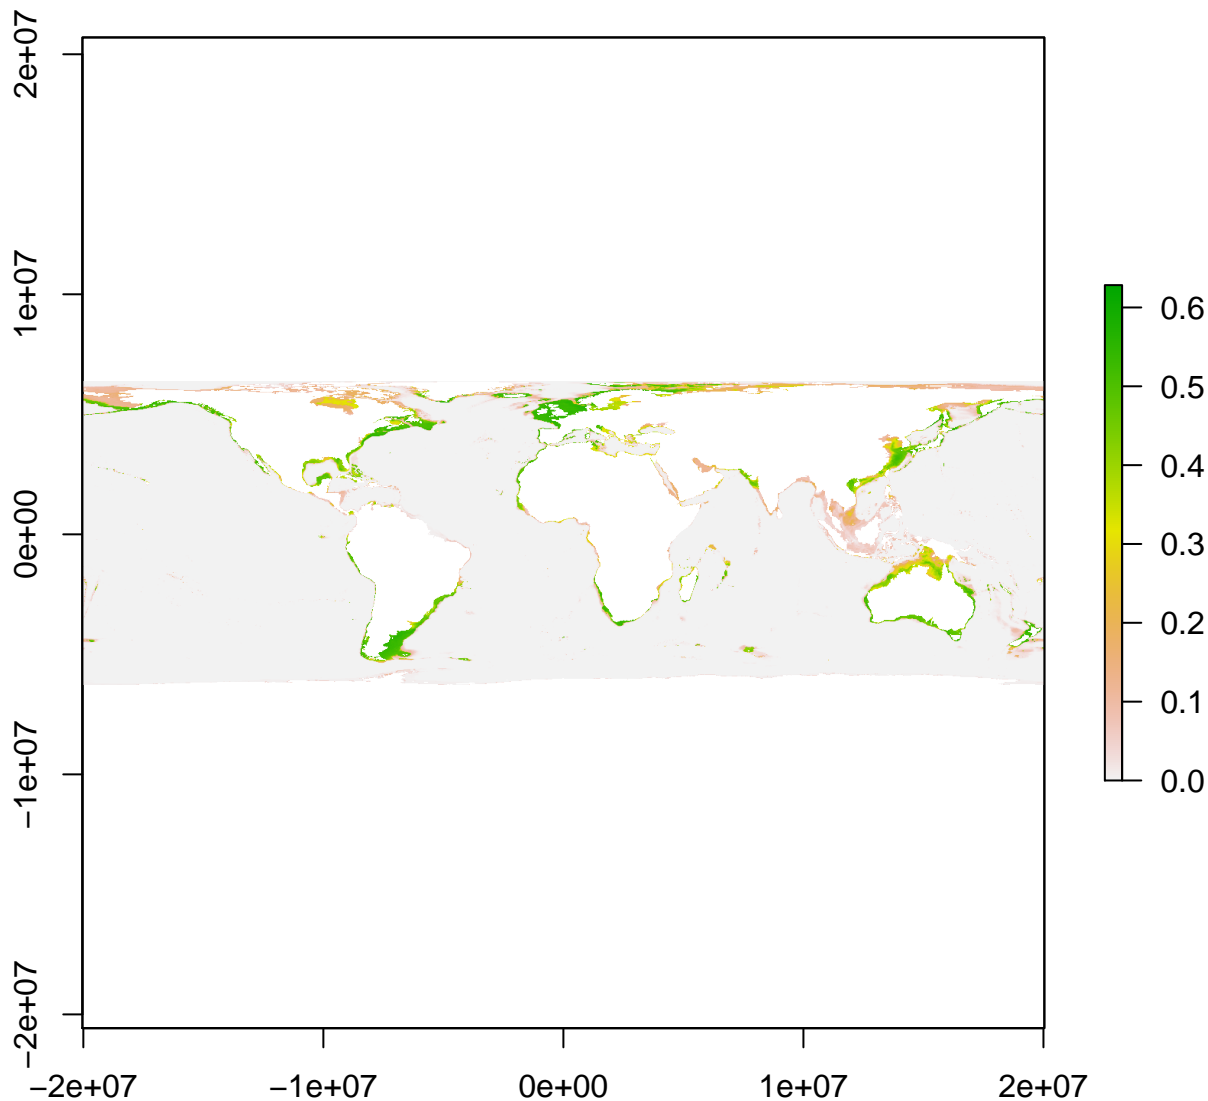

Supplement: s1 [file s1]

# Pseudo\_nitzchia\_fraudulenta\_2050\_RCP2.6

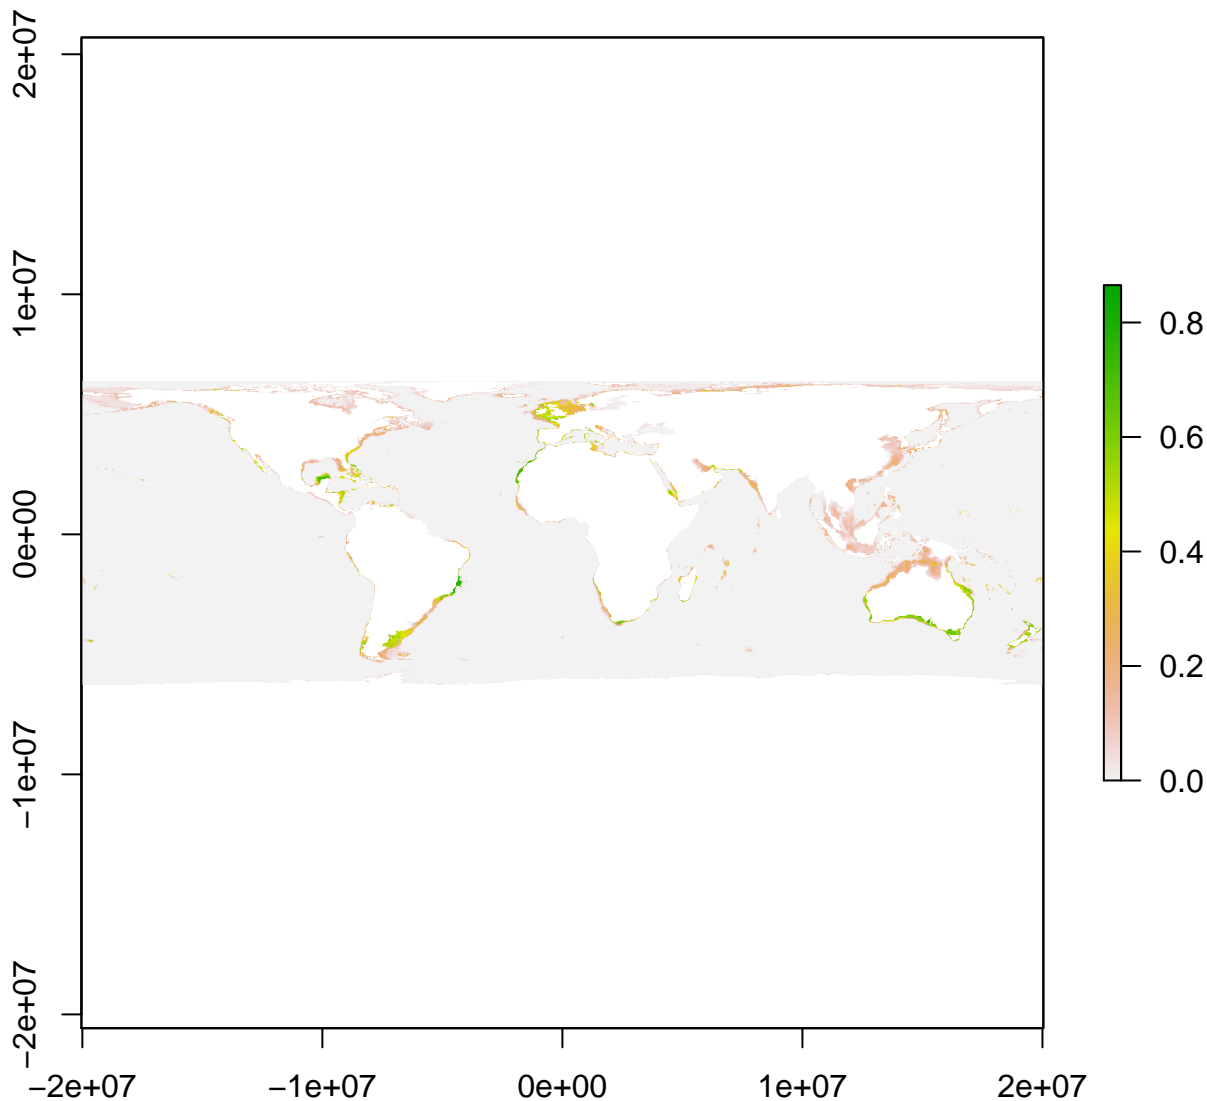

Supplement: s1 [file s1]

# Pseudo\_nitzchia\_fraudulenta\_2050\_RCP6.0

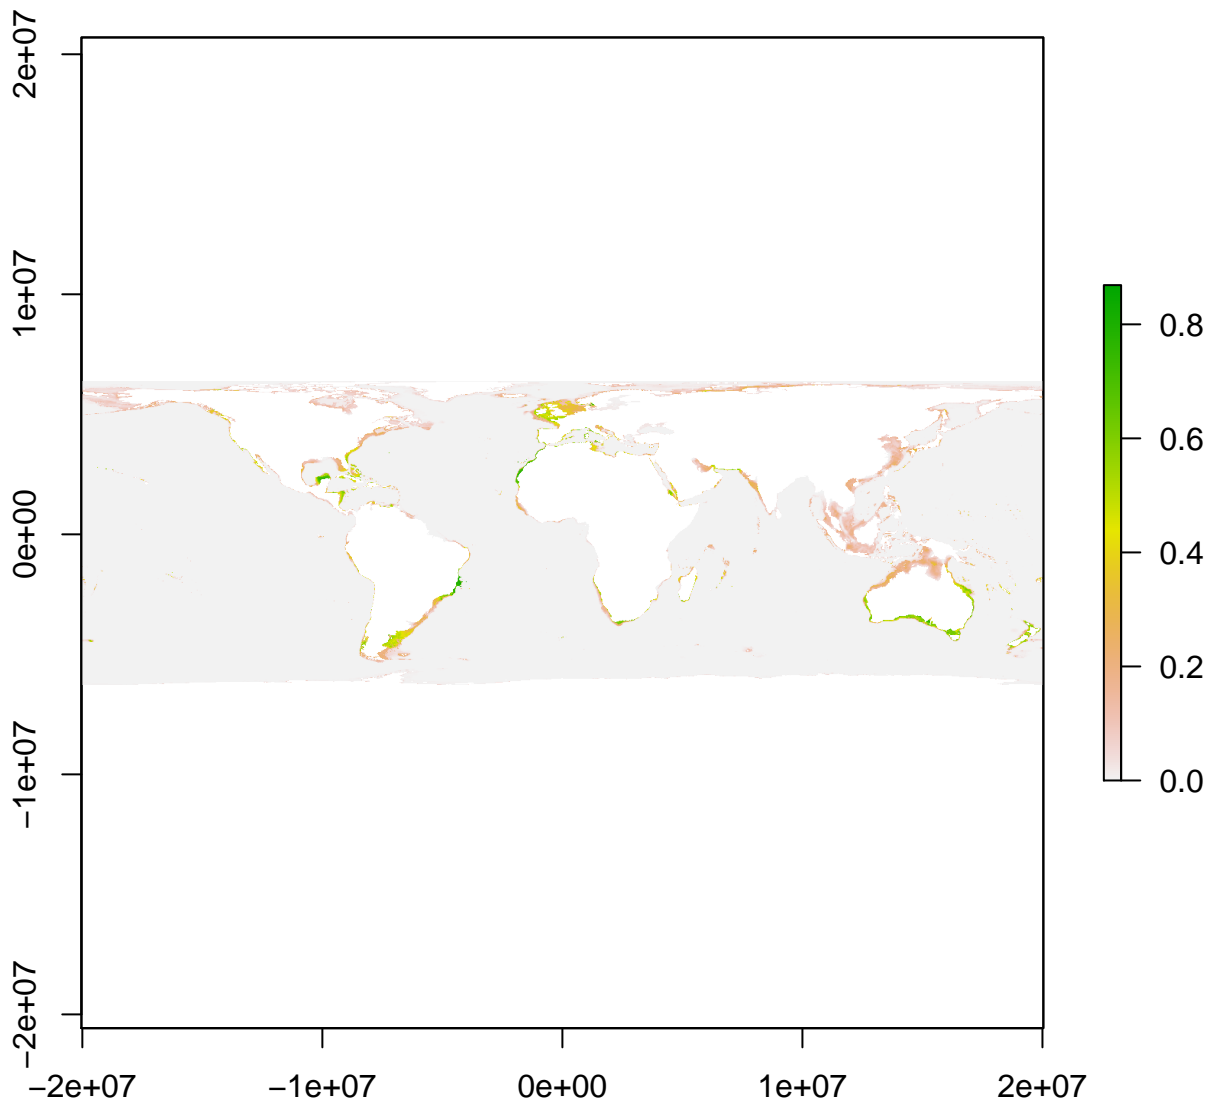

Supplement: s1 [file s1]

# Pseudo\_nitzchia\_fraudulenta\_2100\_RCP6.0\_binary

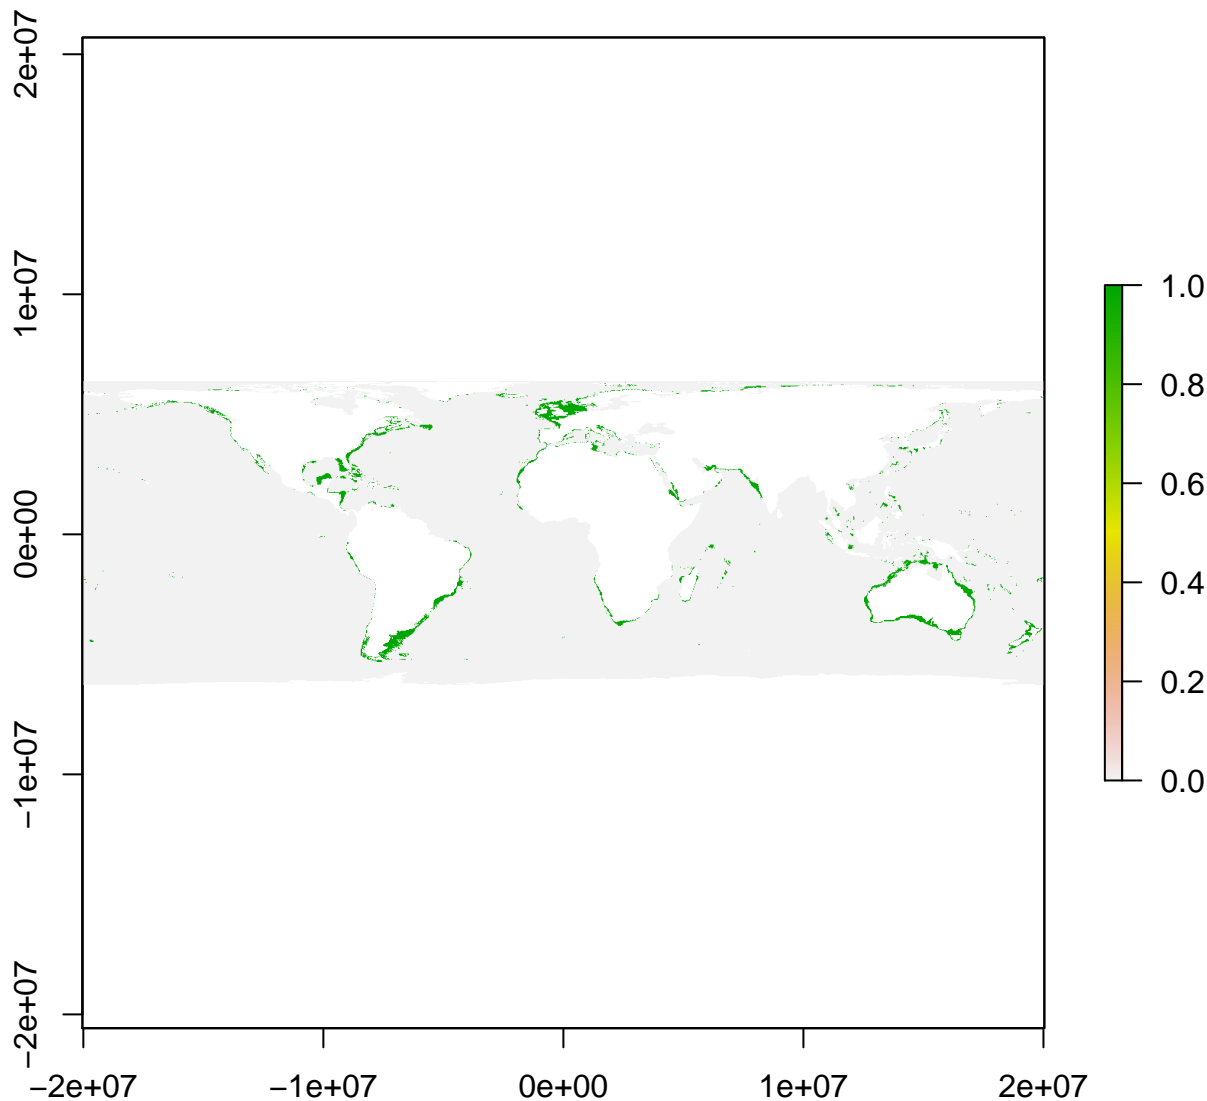

Supplement: s1 [file s1]

# Pseudo\_nitzchia\_serjata\_2100\_RCP4.5\_binary

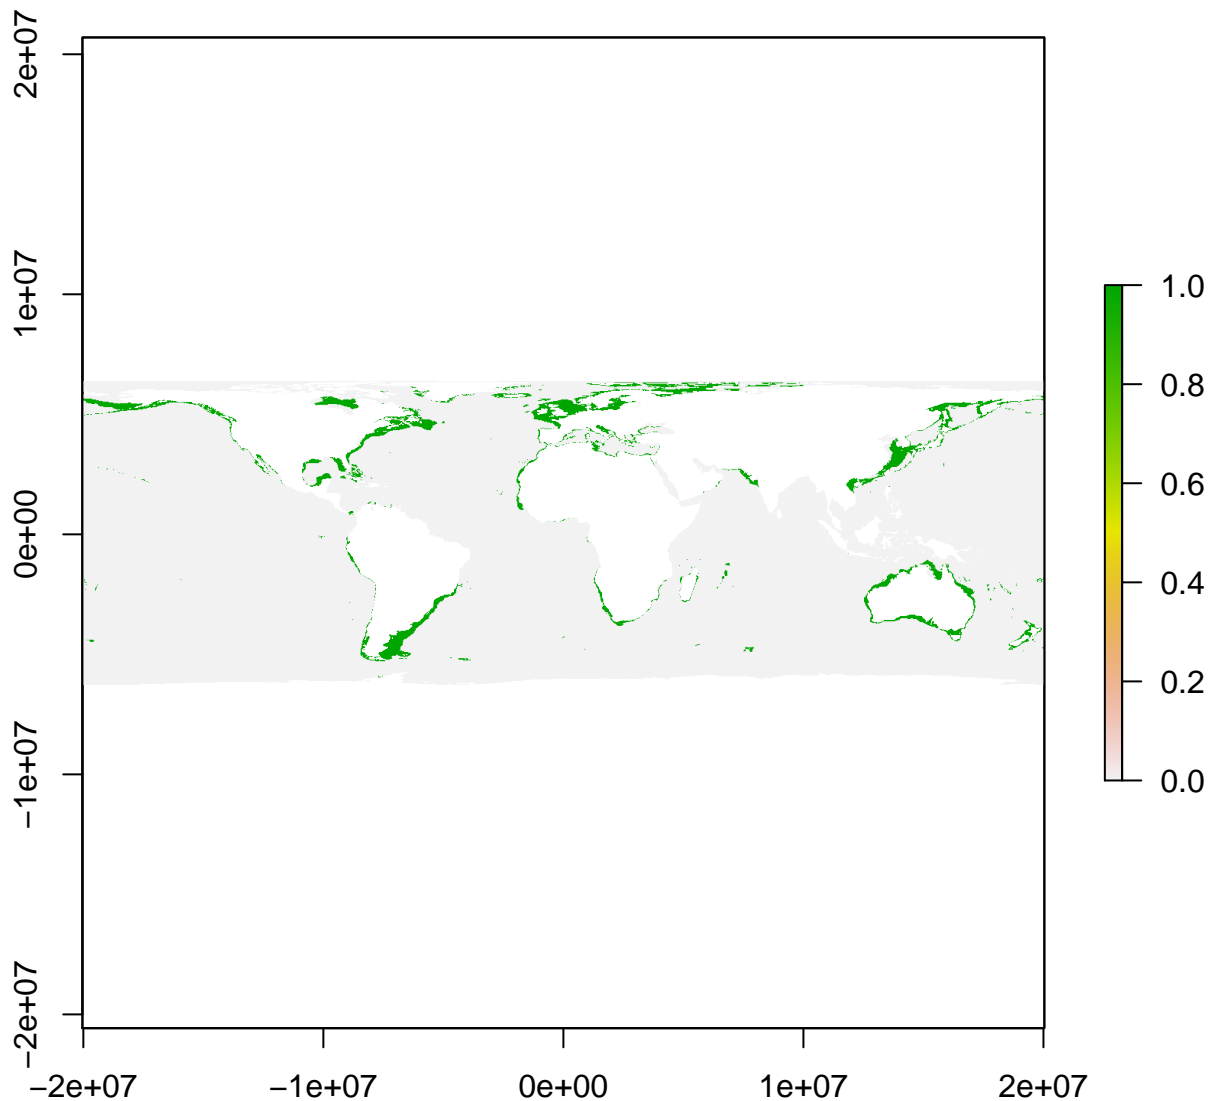

Supplement: s1 [file s1]

**Pseudo\_nitzchia\_serjata\_2050\_RCP4.5\_binary**

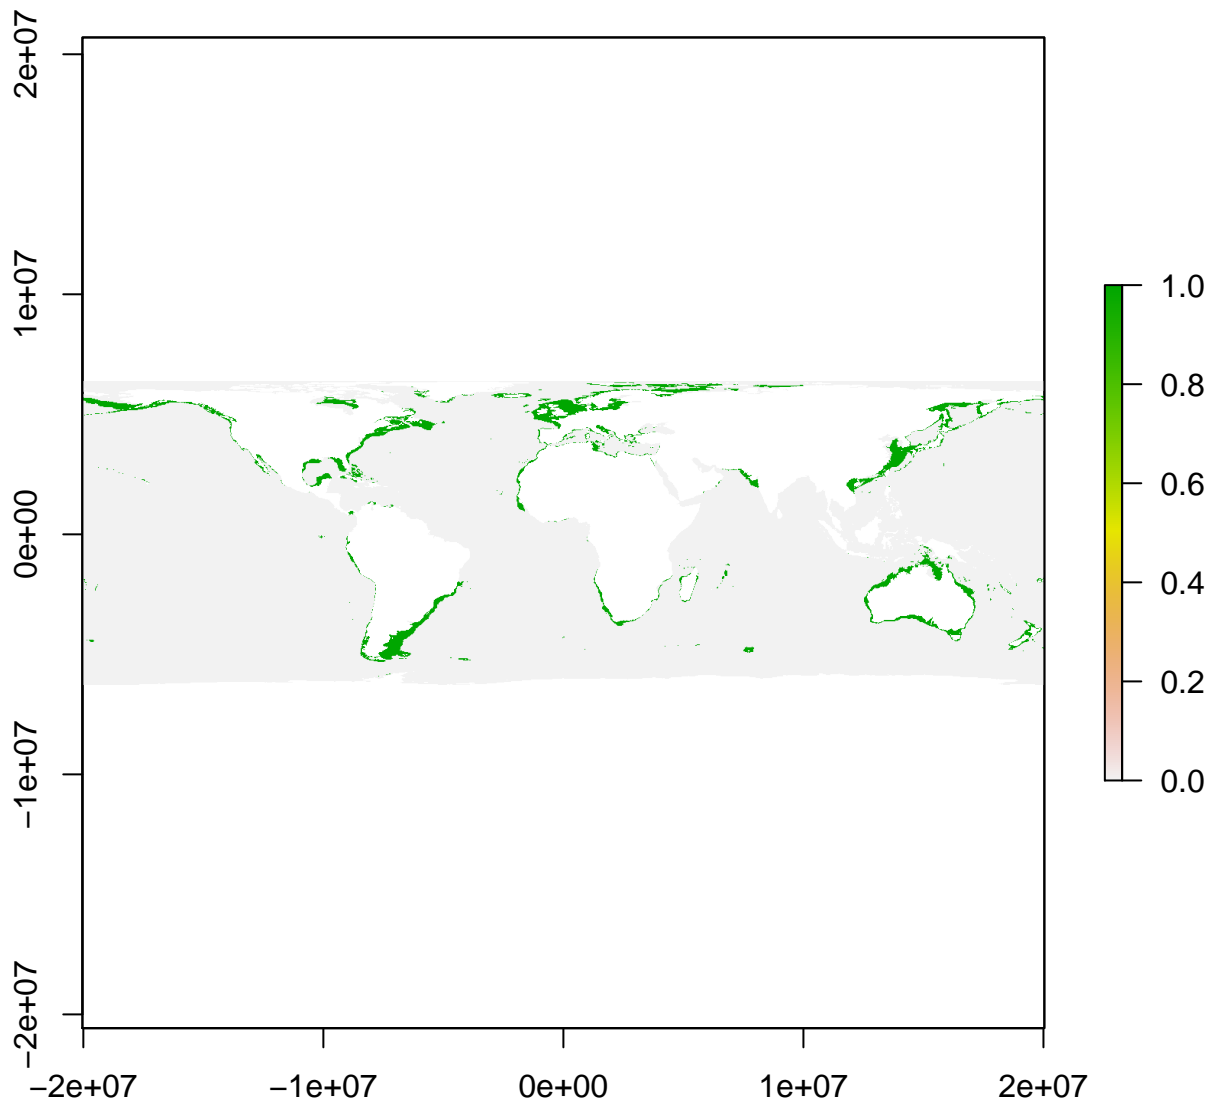

Supplement: s1 [file s1]

# Pseudo\_nitzchia\_fraudulenta\_2100\_RCP2.6\_binary

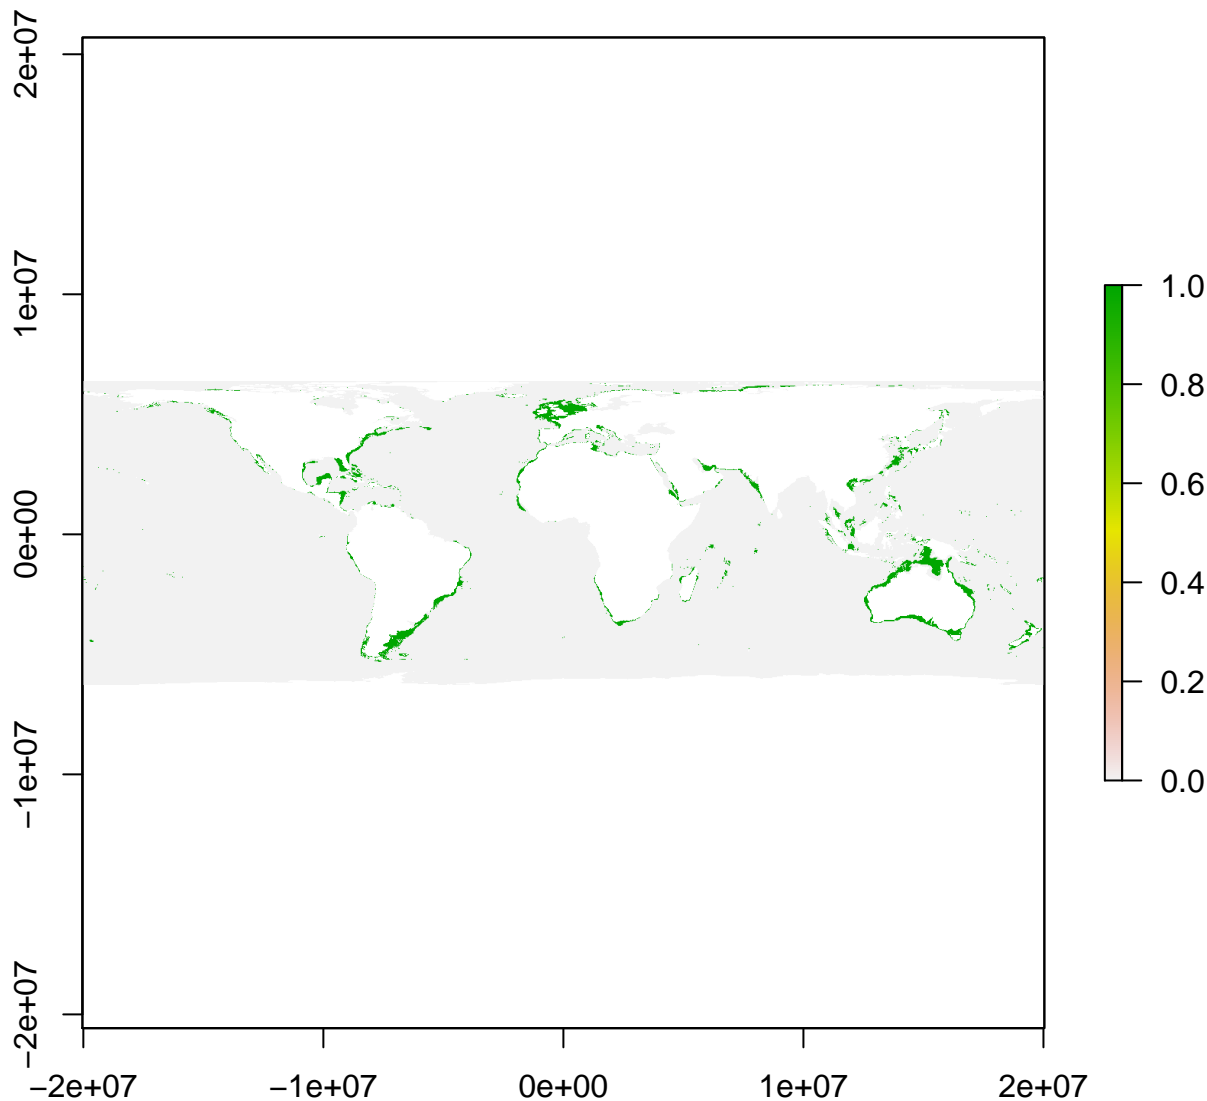

Supplement: s1 [file s1]

# Pseudo-nitzschia\_australis\_present\_binary

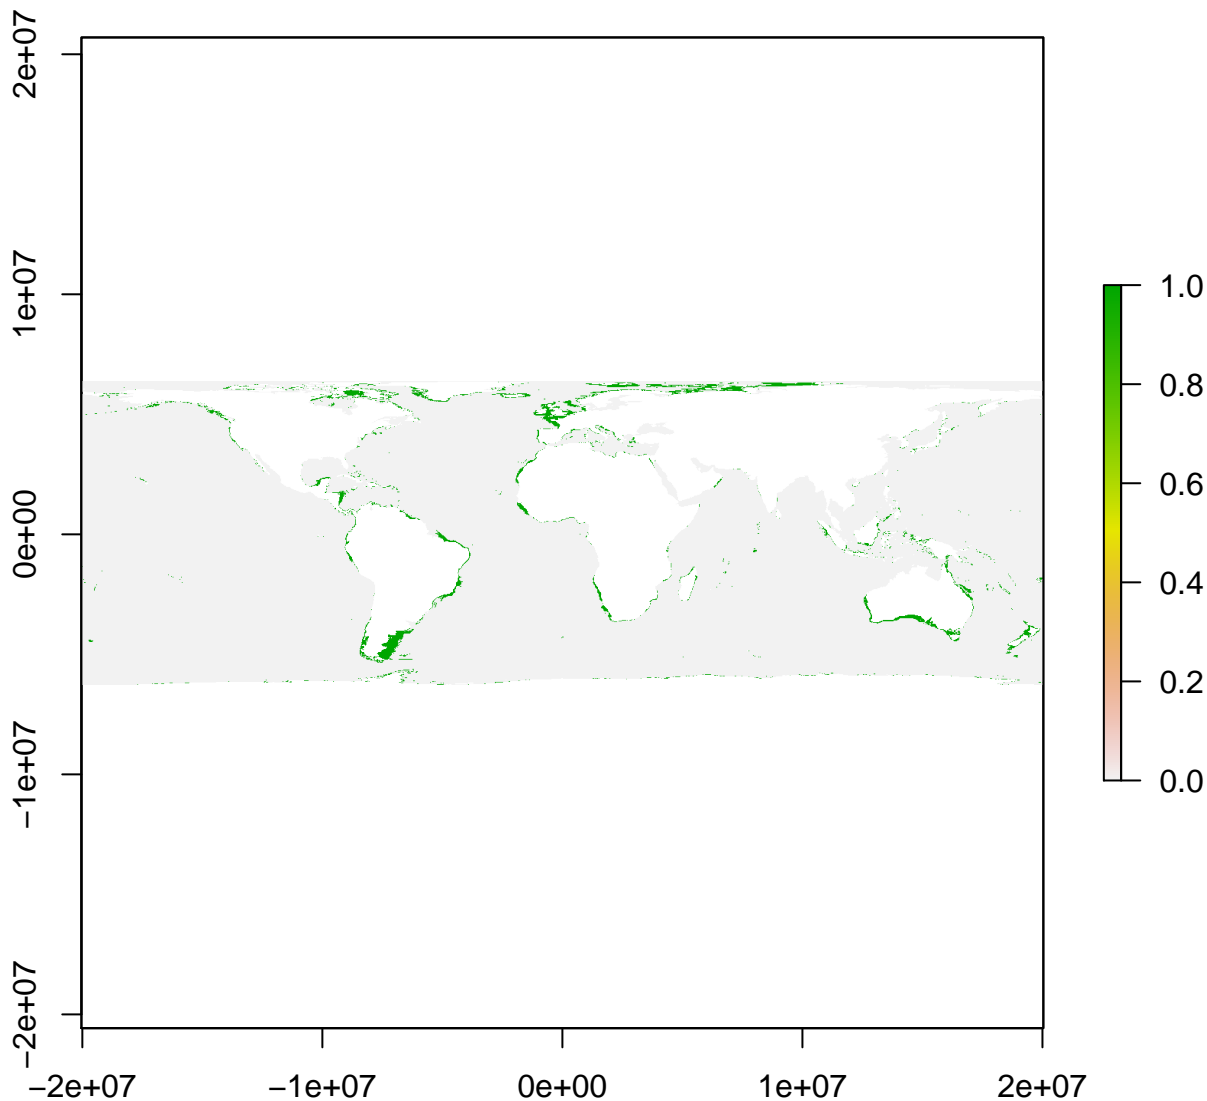

Supplement: s1 [file s1]

# Pseudo\_nitzchia\_seriata\_present

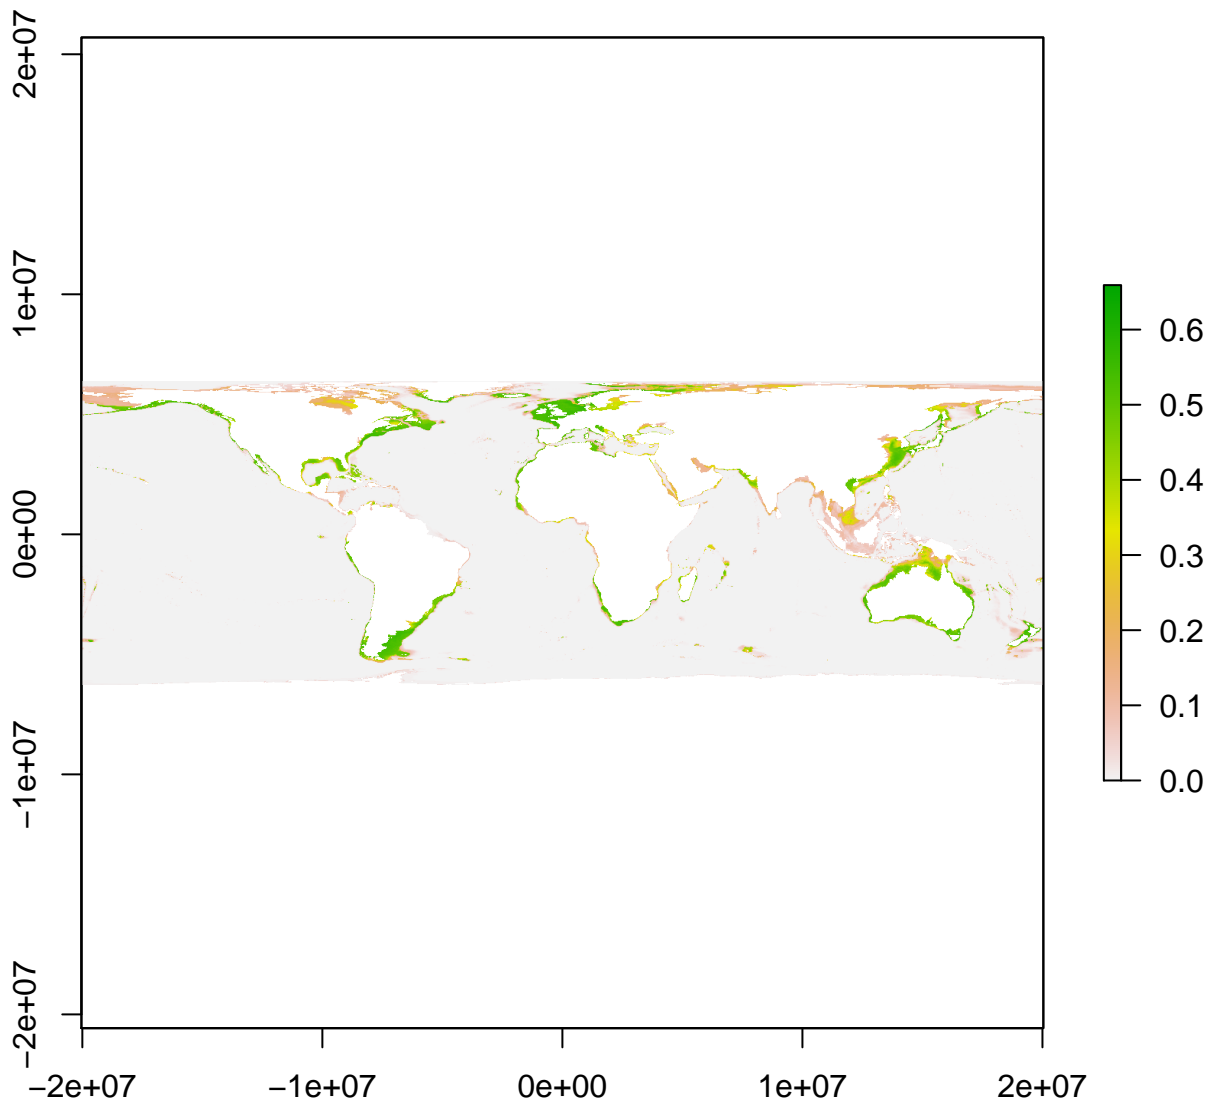

Supplement: s1 [file s1]

# Pseudo\_nitzchia\_seriata\_2050\_RCP8.5

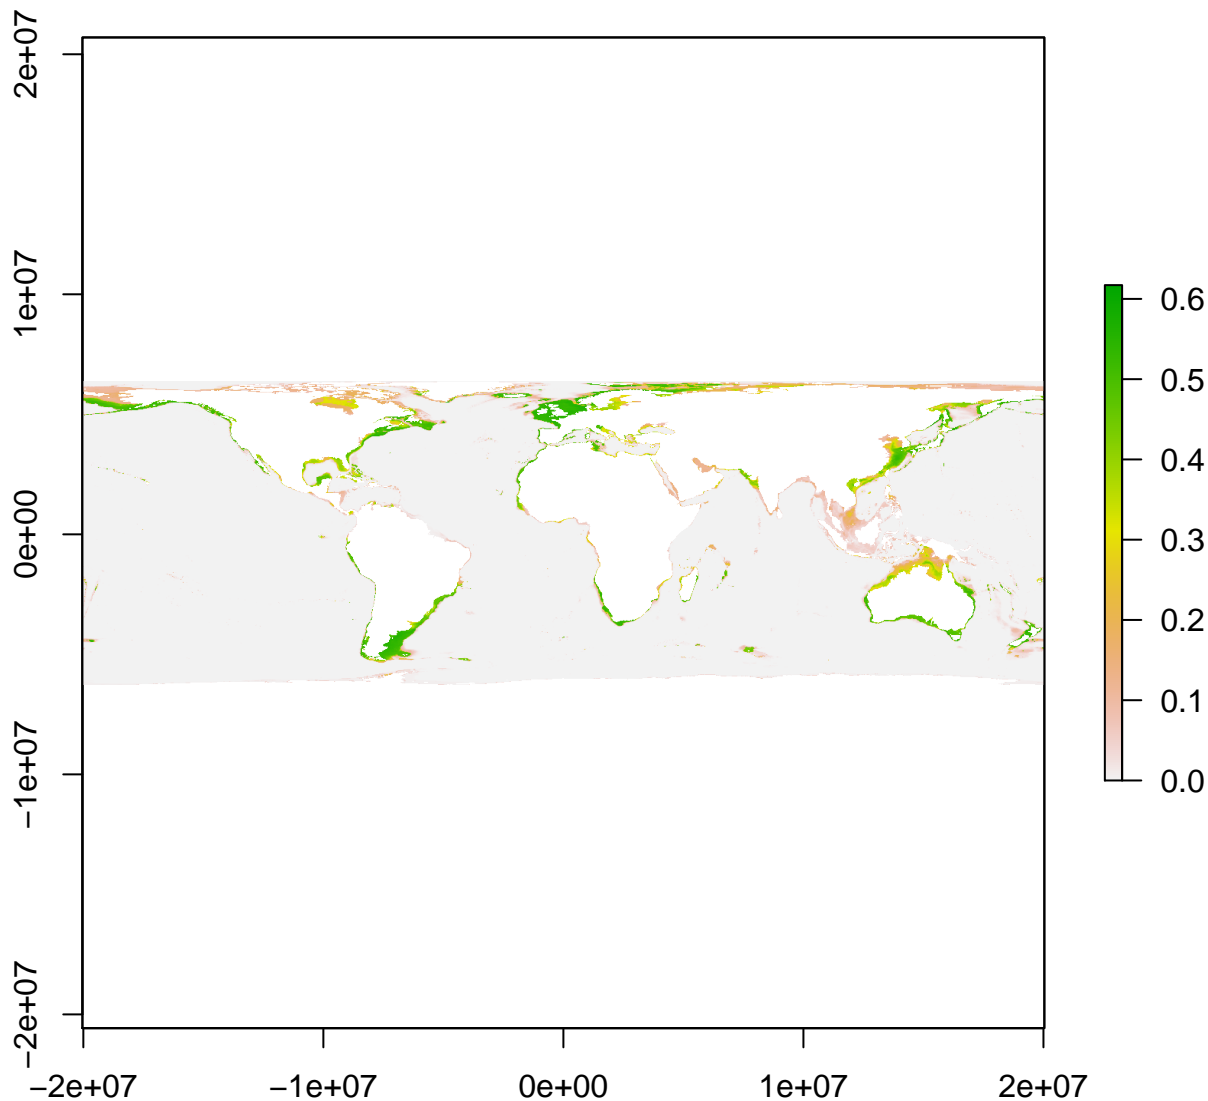

Supplement: s1 [file s1]

# Pseudo\_nitzchia\_fraudulenta\_2050\_RCP6.0\_binary

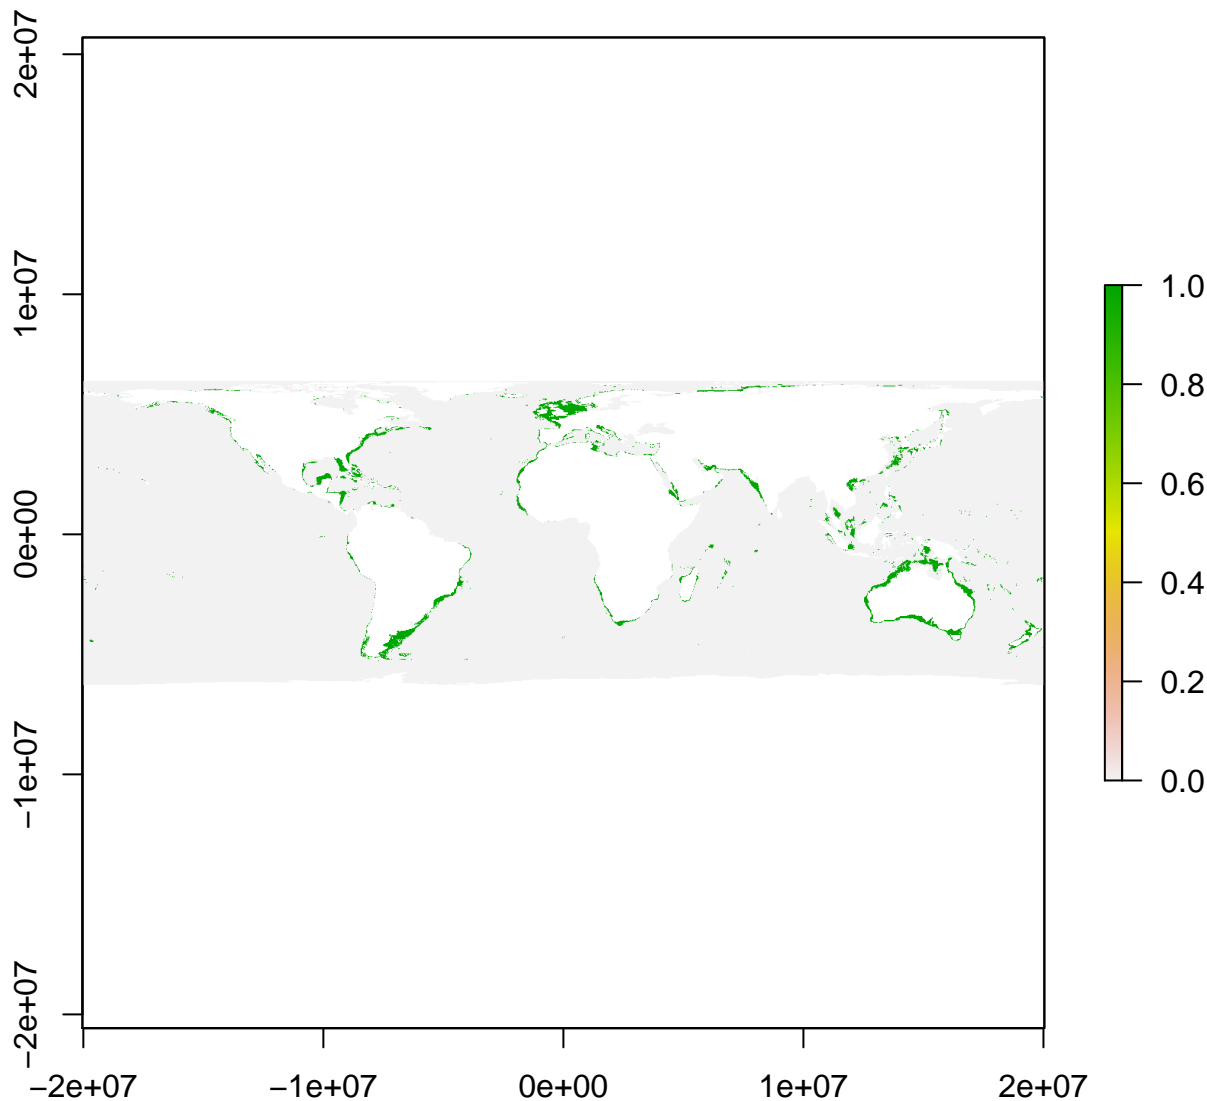

Supplement: s1 [file s1]

# Pseudo\_nitzchia\_seriata\_2050\_RCP4.5

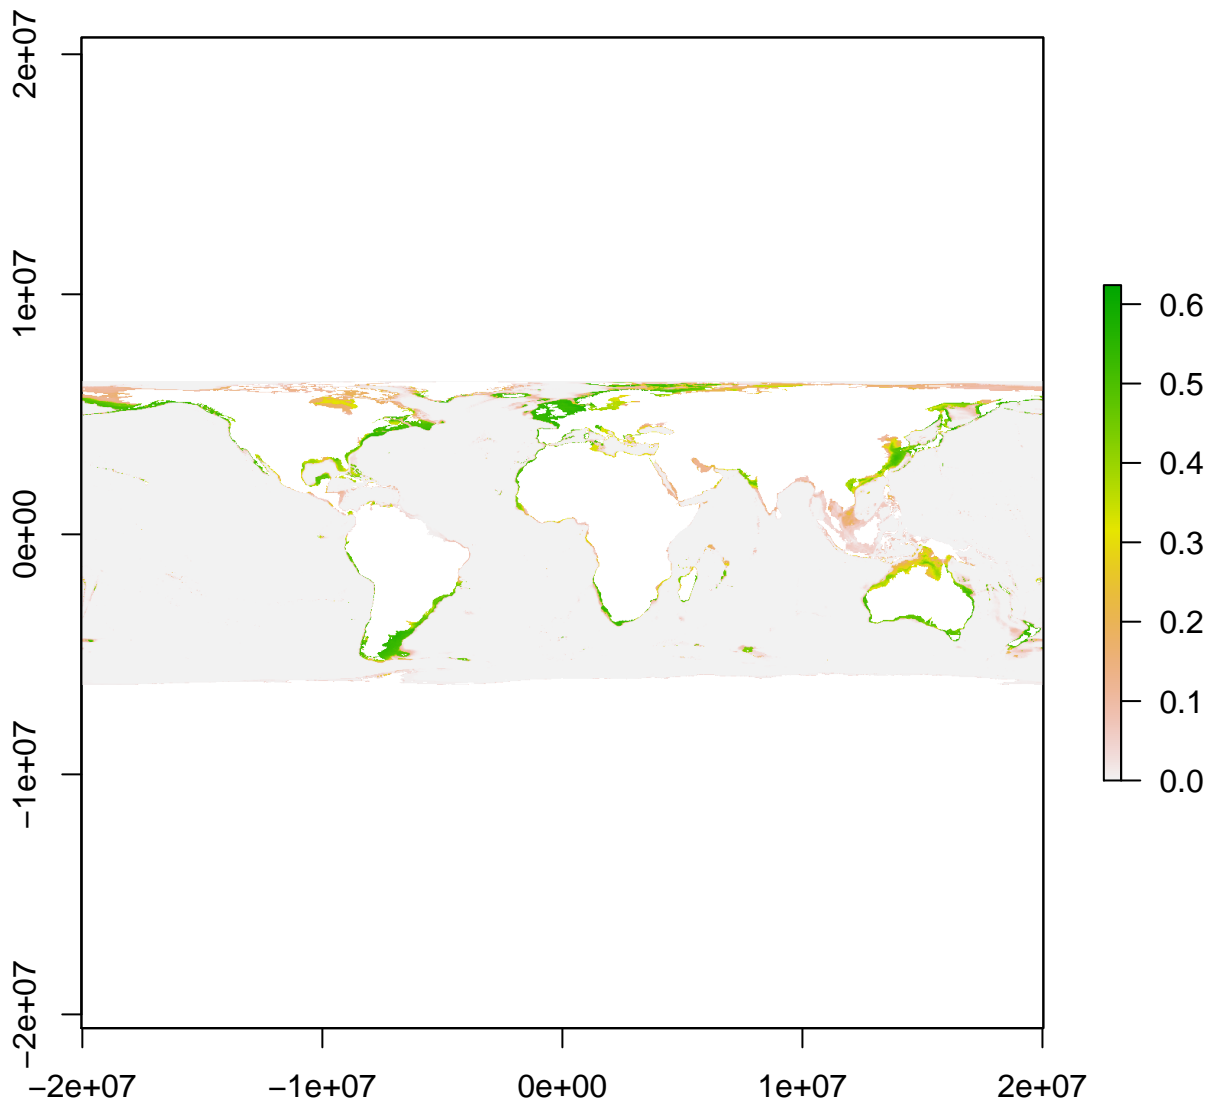

Supplement: s1 [file s1]

# Pseudo-nitzschia\_australis\_2100\_RCP2.6

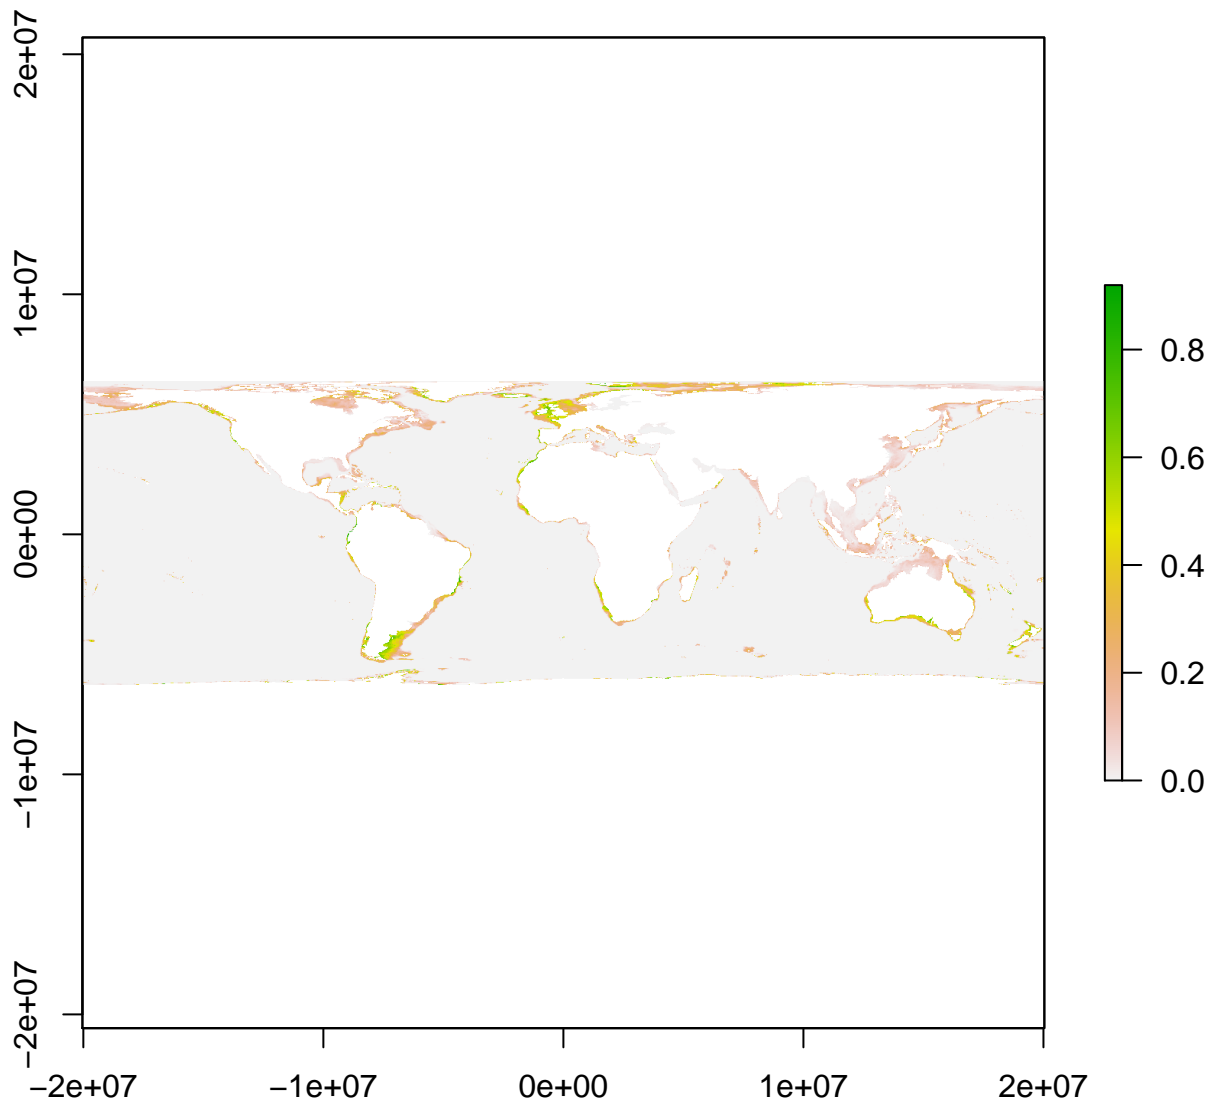

Supplement: s1 [file s1]

# Pseudo-nitzschia\_australis\_2100\_RCP8.5

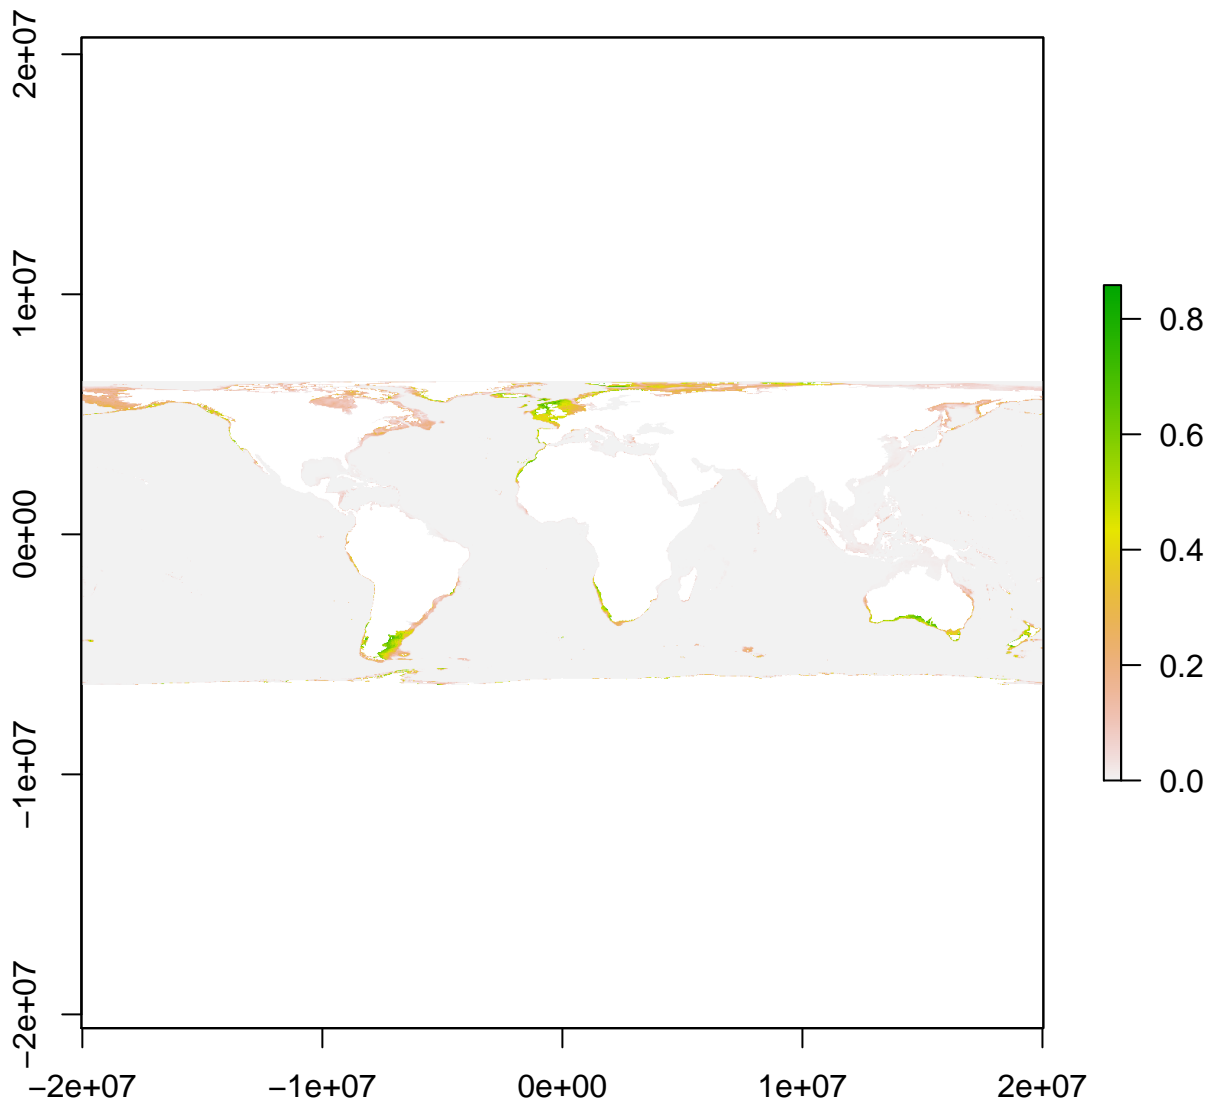

Supplement: s1 [file s1]

# Pseudo\_nitzchia\_fraudulenta\_present\_binary

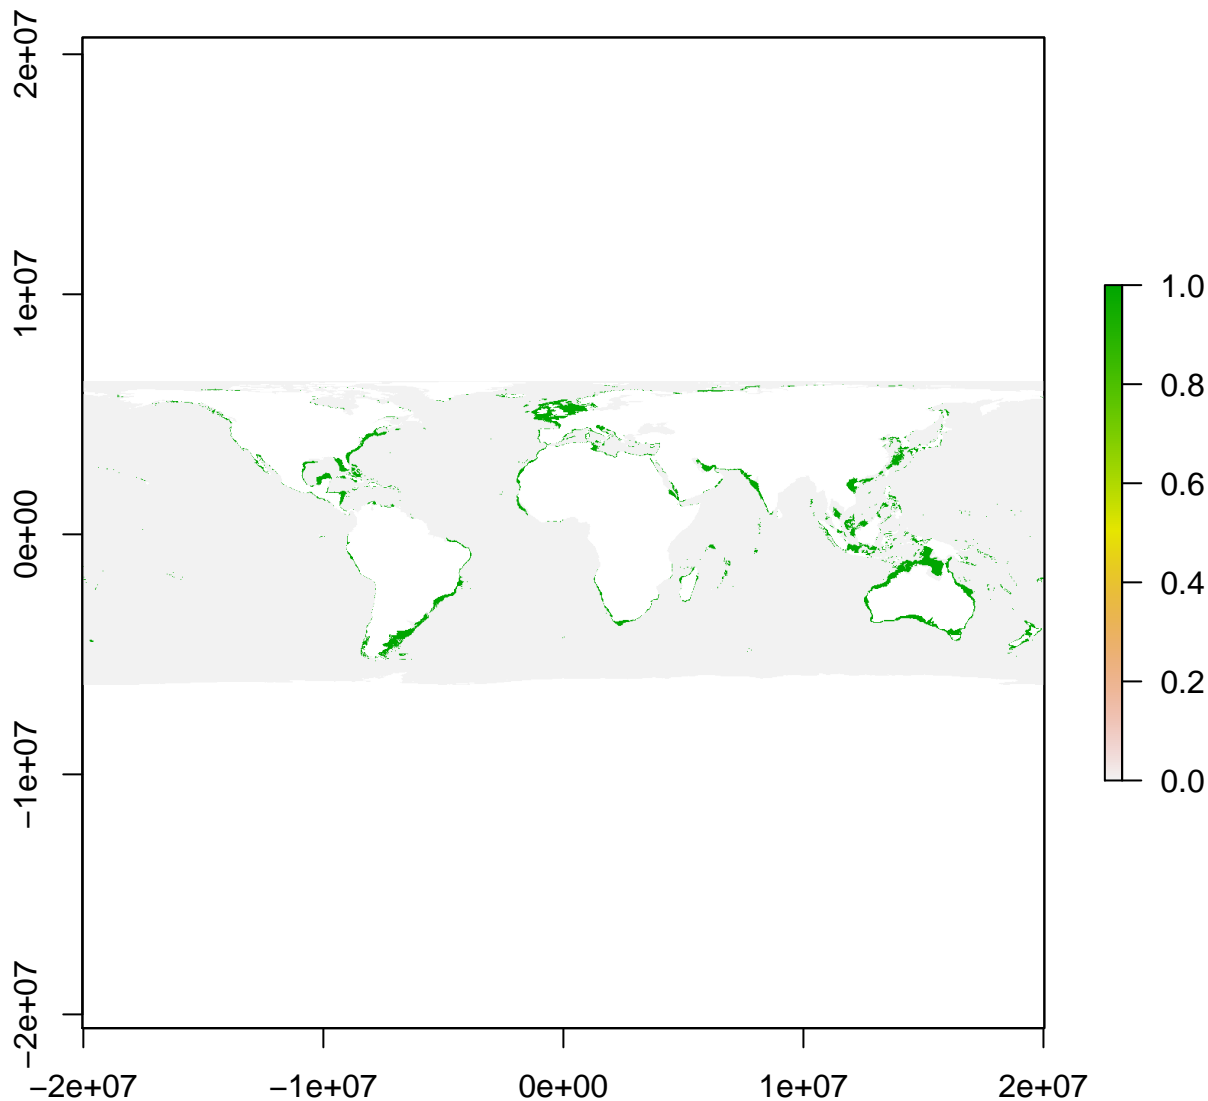

Supplement: s1 [file s1]

# Pseudo-nitzschia\_australis\_2100\_RCP4.5\_binary

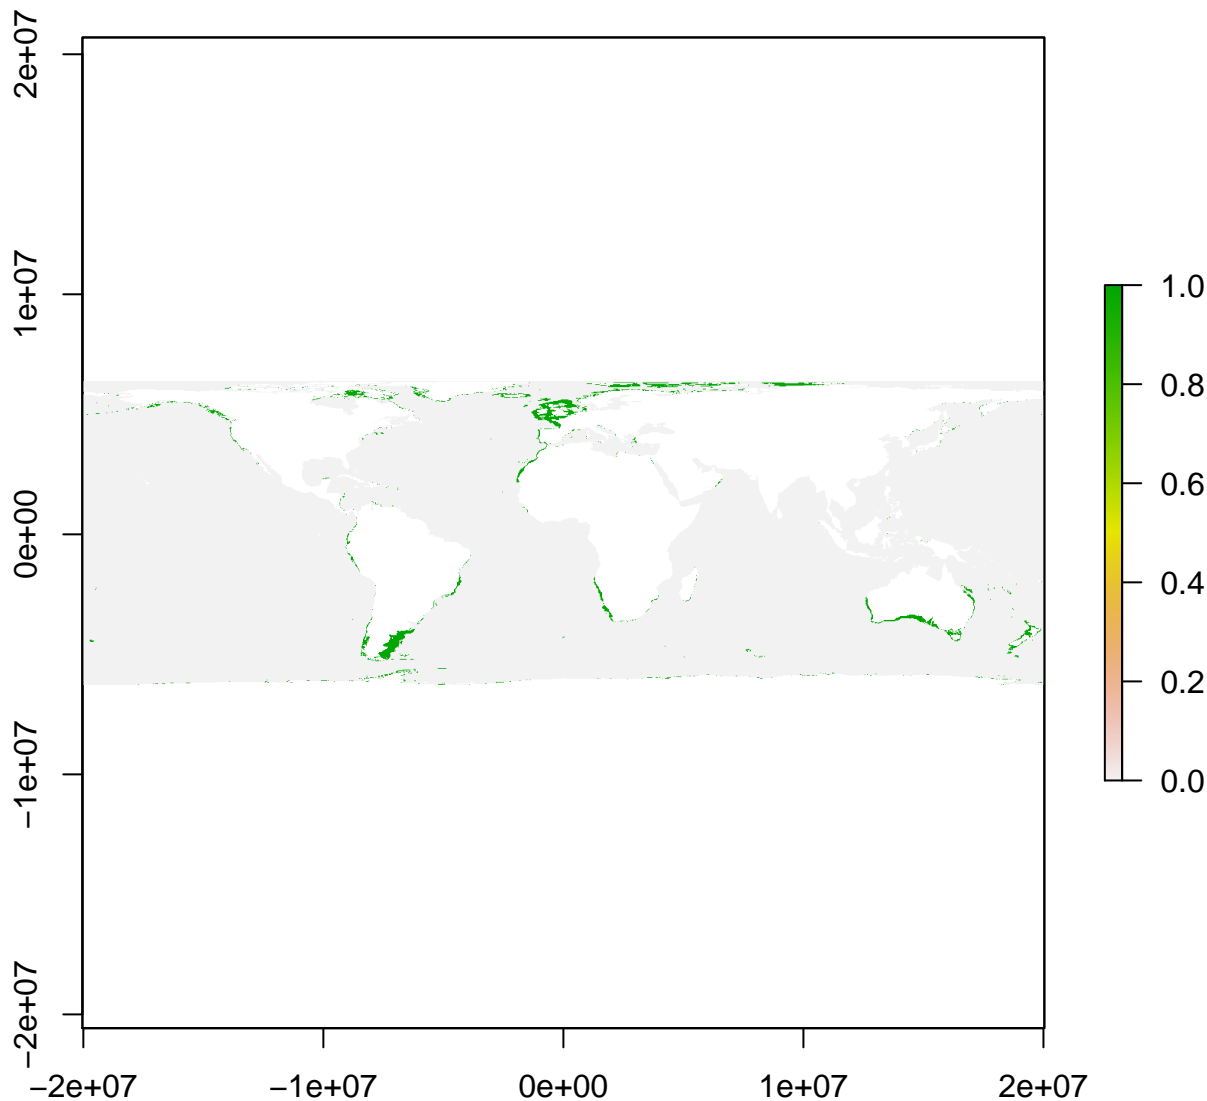

Supplement: s1 [file s1]
